# Supplementary material
Source: Research Square preprint supplement (doi:10.21203/rs.3.rs-9502209/v1)
Supplement: Supplementary file 1 [file 9f442de8360b74b9832c6f78.docx]

**- Supplementary Information -**

**Direct N2O Emissions Constrain the Net Climate Benefits of Anammox Based Nitrogen Removal**

Yuqing Yan1,2, Lin Du1,2, Jun-Jie Zhu1,2, Mark A. Zondlo1, Ruqiao Emma Shen3, Krishna R. Pagilla4, Zhiyong Jason Ren1,2*

1Department of Civil and Environmental Engineering, Princeton University, Princeton, NJ 08544, USA

2Andlinger Center for Energy and the Environment, Princeton University, Princeton, NJ 08544, USA

3 Jacobs Consultancy Canada Inc. Toronto, ON M5H 3T9, Canada

4 Department of Civil and Environmental Engineering, University of Nevada Reno, NV, 89557, USA

*Email: [zjren@princeton.edu](mailto:zjren@princeton.edu)

1. Meta-data structure, *∆CI* calculation parameters and mainstream/side-stream separation

**Table S1**: (a) Keywords used for literature mining; (b) Metadata of literature-based emission factor of novel nitrogen removal processes with operational parameters and process information (see “Supplementary_Tables.xlsx”)

**Table S2**: Energy saving calculation parameters.

(**a**) Stoichiometric change in oxygen demand

| Nitrogen Removal Mechanism | Overall Reaction (methanol as carbon source) | *O2,req* (kgO2/kg TNremoved) | *C,req* (kgC/kg TNremoved) |
| --- | --- | --- | --- |
| Partial Nitrification / Anammox (PNA) | **Partial Nitrification:** NH₄⁺ + 1.5O₂ → NO₂⁻ + 2H⁺ + H₂O  **Anammox:** NH₄⁺ + 1.32NO₂⁻ → 1.02N₂ + 0.26NO₃⁻ + 2.03H₂O | 2.22 | 0 |
| Partial Nitrification (PN) | **Partial Nitrification:** NH₄⁺ + 1.5O₂ → NO₂⁻ + 2H⁺ + H₂O | 3.43 | 0 |
| Anammox (AMX) | **Anammox:** NH₄⁺ + 1.32NO₂⁻ → 1.02N₂ + 0.26NO₃⁻ + 2.03H₂O | 0 | 0 |
| Partial Denitrification / Anammox (PdNA) | **Nitrification:** NH₄⁺ + 2O₂ → NO₃⁻ + 2H⁺ + H₂O  **Partial Denitrification:** CH3OH + 3NO₃⁻ → 3NO2⁻ + CO2 + 2H2O  **Anammox:** NH₄⁺ + 1.32NO₂⁻ → 1.02N₂ + 0.26NO₃⁻ + 2.03H₂O | 2.96 | 0.185 |
| Nitrification / Anammox (NiA) | **Nitrification:** NH₄⁺ + 2O₂ → NO₃⁻ + 2H⁺ + H₂O  **Anammox:** NH₄⁺ + 1.32NO₂⁻ → 1.02N₂ + 0.26NO₃⁻ + 2.03H₂O | 2.96 | 0 |
| Simultaneous Partial Nitrification, ANAMMOX and Denitrification (SNAD) | **Partial Nitrification:** NH₄⁺ + 1.5O₂ → NO₂⁻ + 2H⁺ + H₂O  **Anammox:** NH₄⁺ + 1.32NO₂⁻ → 1.02N₂ + 0.26NO₃⁻ + 2.03H₂O  **Denitrification:** 5CH₃OH + 6NO₃⁻ → 3N₂ + 5CO₂ + 7H₂O + 6OH⁻ | 2.22 | 0.091 |
| Partial Denitrification (PD) | **Partial Denitrification:** CH3OH + 3NO₃⁻ → 3NO2⁻ + CO2 + 2H2O | 0 | 0.185 |
| Thiosulfate-Driven Denitritation-anammox (TDD-AMX) | **Partial Nitrification:** NH₄⁺ + 1.5O₂ → NO₂⁻ + 2H⁺ + H₂O  **Partial Denitrification:** NO₃⁻ + 0.4 S₂O₃²⁻ + 0.8 H⁺ → NO₂⁻ + 0.8 S + 0.4 SO₄²⁻ + 0.4 H₂O  **Anammox:** NH₄⁺ + 1.32NO₂⁻ → 1.02N₂ + 0.26NO₃⁻ + 2.03H₂O | 0 | 0 |
| Partial Nitritation, Anammox and Methane-dependent nitrite/nitrate reduction reactions (PNAM) | **Partial Nitrification:** NH₄⁺ + 1.5O₂ → NO₂⁻ + 2H⁺ + H₂O  **Anammox:** NH₄⁺ + 1.32NO₂⁻ → 1.02N₂ + 0.26NO₃⁻ + 2.03H₂O  **Methane-driven Denitrification:** 5 CH₄ + 8 NO₃⁻ → 4 N₂ + 5 CO₂ + 6 H₂O + 8 OH⁻ | 2.22 | 0 |
| Nitrification / Denitrification (NDN) | **Nitrification:** NH₄⁺ + 2O₂ → NO₃⁻ + 2H⁺ + H₂O  **Denitrification:** 5CH₃OH + 6NO₃⁻ → 3N₂ + 5CO₂ + 7H₂O + 6OH⁻ | 4.57 | 0.71 |

(**b**) Oxygen transfer rate estimated based on aeration technology

| Aeration Type | Reactor | OTR (kgO2/kWh) | Source |
| --- | --- | --- | --- |
| Medium-Bubble Diffuser | Moving Bed Biofilm Reactor (MBBR) | 1.4-1.9 | 1 |
| Integrated Fixed-Film Activated Sludge (IFAS) |
| Fine-Bubble Diffuser | Bubble Column Reactor (BCR) | 2-2.5 | 2 |
| Sequencing Batch Biofilm Reactor (SBBR) |
| Sequencing Batch Reactor (SBR) |
| Completely Stirred Tank Reactor (CSTR) |
| Continuous-Flow Biofilm Reactor (CFBR) |
| Coarse-Bubble Diffuser | Gas Lift Reactor (GLR) | 0.8-1.2 | 2 |
| Attached-Film Expanded Bed (AFEB) |
| Surface Aerator | Rotating Biological Contactor (RBC) | 1.5-2.1 | 3 |
| Non-aerated/Passive Diffusion | Down-flow Hanging Sponge (DHS) | - | - |
| Upflow Fixed-bed Anammox Reactor (UFAR) |
| Upflow Anaerobic Sludge Blanket (UASB) |
| Expanded Granular Sludge Bed (EGSB) |
| Trickling Filter (TF) |
| Membrane Biofilm Reactor (MBfR) |
| Membrane-based | Membrane Aerated Biofilm Reactor (MABR) | 4-6 | 4, 5 |
| Membrane Bioreactor (MBR) | 3.04-4.26 | 3 |

**Table S3**: *EFscope-2*based on region and study year.

| Country | Database | Dated |
| --- | --- | --- |
| Australia | NGAF <https://www.dcceew.gov.au/climate-change/publications/national-greenhouse-accounts-factors-2025> | 2014-2025 |
| Austria | EEA <https://www.eea.europa.eu/en/analysis/indicators/greenhouse-gas-emission-intensity-of-1?activeAccordion=ecdb3bcf-bbe9-4978-b5cf-0b136399d9f8> | 1990, 2000, 2010, 2023 |
| Belgium |
| Denmark |
| France |
| Germany |
| Ireland |
| Italy |
| Netherlands |
| Spain |
| Sweden |
| Brazil | B3 report <https://b3.com.br/data/files/1F/50/2C/57/95DE59109B3D0D59AC094EA8/Inventario> de Emissoes Gases de Efeito Estufa_2024_Eng_v02 _VF_.pdf | 2024 |
| China | MEE <https://www.mee.gov.cn/xxgk2018/xxgk/xxgk01/202412/t20241226_1099413.html> | 2021, 2022 |
| Japan | REI <https://www.renewable-ei.org/en/activities/column/REupdate/20240814_1.php> | 1990-2022 |
| Malaysia | MyEnergyStatus <https://myenergystats.st.gov.my/documents/d/guest/grid-emission-factor-gef-in-malaysia> | 2017-2022 |
| South Korea | Kim et al., 2025 <https://www.eeer.org/journal/view.php?doi=10.4491/eer.2024.596> | 2023 |
| Switzerland | Romano et al., 2024 <https://www.sciencedirect.com/science/article/pii/S0360544224031748#fig1> | 2017-2021 |
| Thailand | TGGO <https://ghgreduction.tgo.or.th/en/premium-t-ver-download/download/6966/3801/32.html>. | 2020, 2021 |
| The United States | eGrid <https://www.epa.gov/egrid/data-explorer> | 2018-2023 |


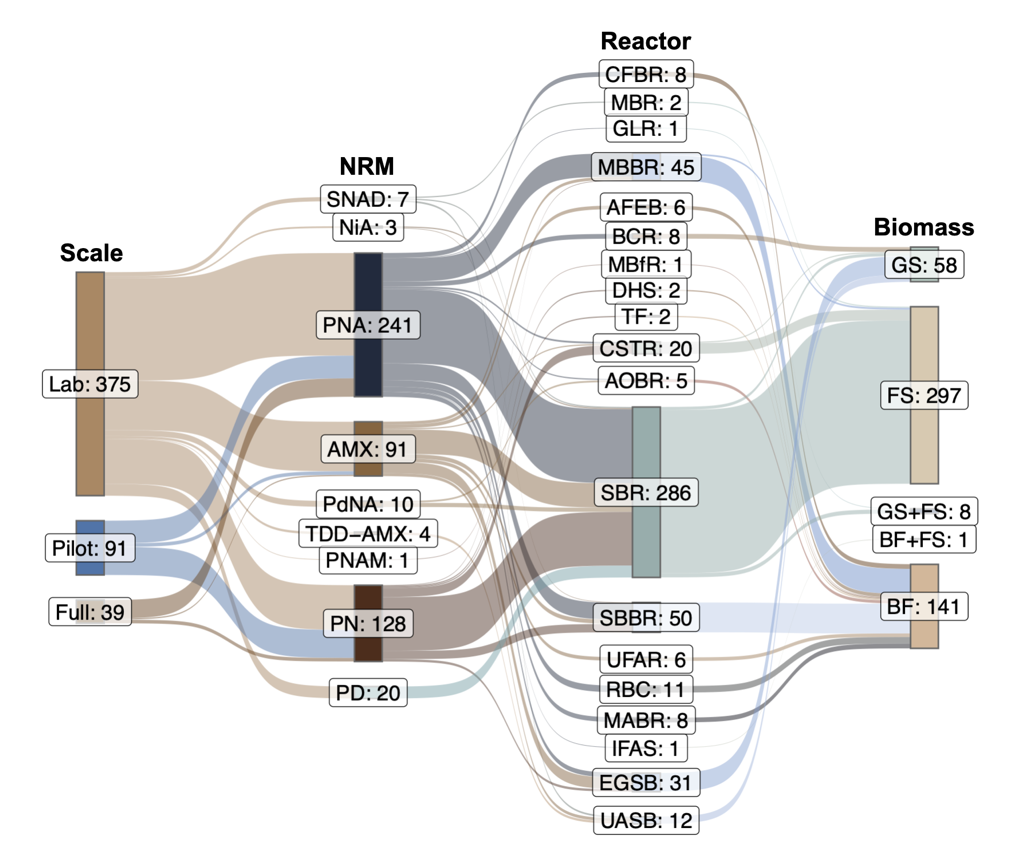


**Figure S1**:Structure of collected data across system scale, nitrogen removal mechanism (NRM), reactor configuration and biomass form. **NRM**: Partial Nitrification / Anammox (PNA), Partial Nitrification (PN), Anammox (AMX), Partial Denitrification / Anammox (PdNA), Nitrification / Anammox (NiA), Simultaneous partial Nitrification, ANAMMOX and Denitrification (SNAD), Partial Denitrification (PD), Thiosulfate-Driven Denitritation-anammox (TDD-AMX), Partial Nitritation, Anammox and Methane-dependent nitrite/nitrate reduction reactions (PNAM). **Reactor**: Sequencing Batch Reactor (SBR), Sequencing Batch Biofilm Reactor (SBBR), Stirred Tank Reactor (CSTR), Attached-Film Expanded Bed (AFEB), Membrane Aerated Biofilm Reactor (MABR), Moving Bed Biofilm Reactor (MBBR), Upflow Anaerobic Sludge Blanket (UASB), Expanded Granular Sludge Bed (EGSB), Down-flow Hanging Sponge (DHS), Gas Lift Reactor (GLR), Integrated Fixed-Film Activated Sludge (IFAS), Rotating Biological Contactor (RBC), Membrane Biofilm Reactor (MBfR), Membrane Bioreactor (MBR), Continuous-Flow Biofilm Reactor (CFBR), Upflow Fixed-bed Anammox Reactor (UFAR), Bubble Column Reactor (BCR). **Biomass**: Flocculent Sludge (FS), Biofilm (BF), Granular Sludge (GS), Granular Sludge + Flocculent Sludge (GS+FS), Biofilm + Flocculent Sludge (BF+FS).


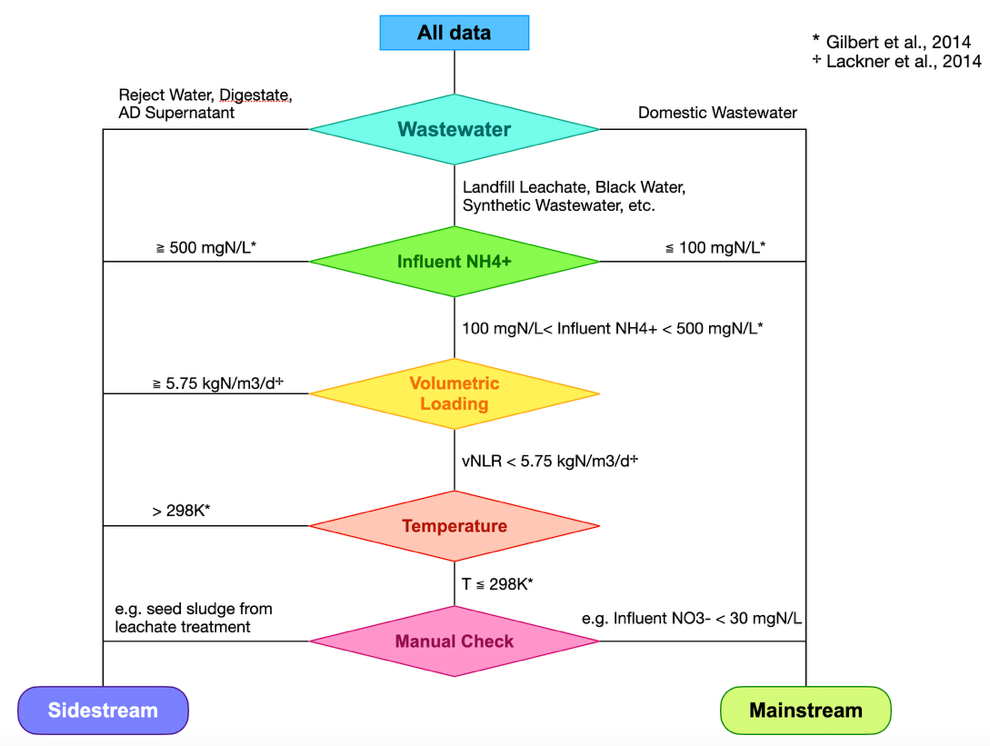


**Figure S2**: Wastewater type differentiation.

2. *EF** summary for PD and AMX


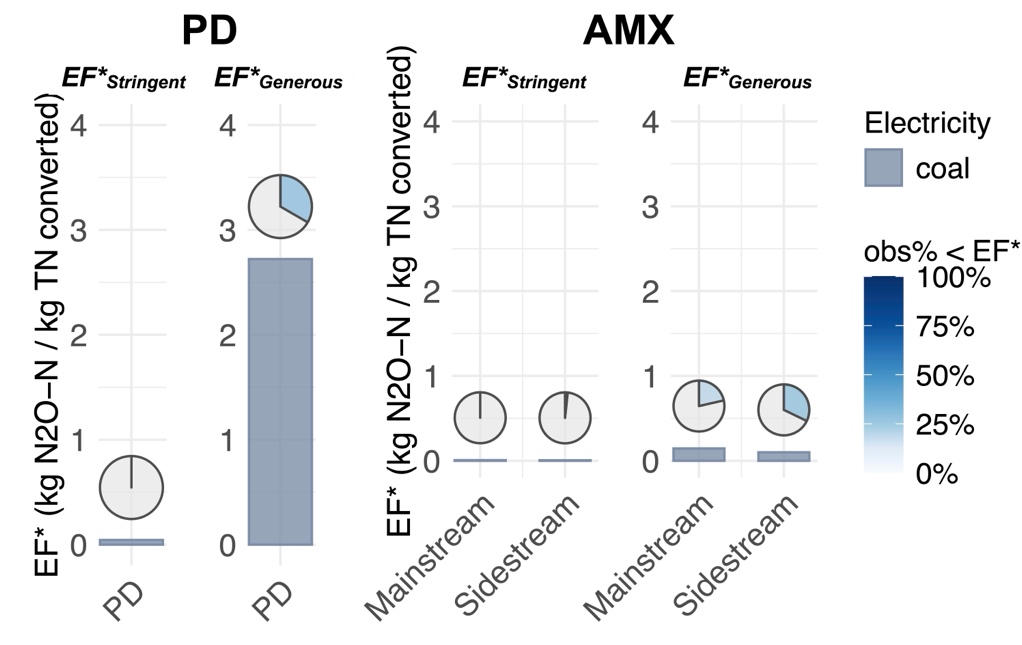


**Figure S3**: *EF** and portions of observations lower than *EF** for PD and AMX.

3. Correlation Analysis


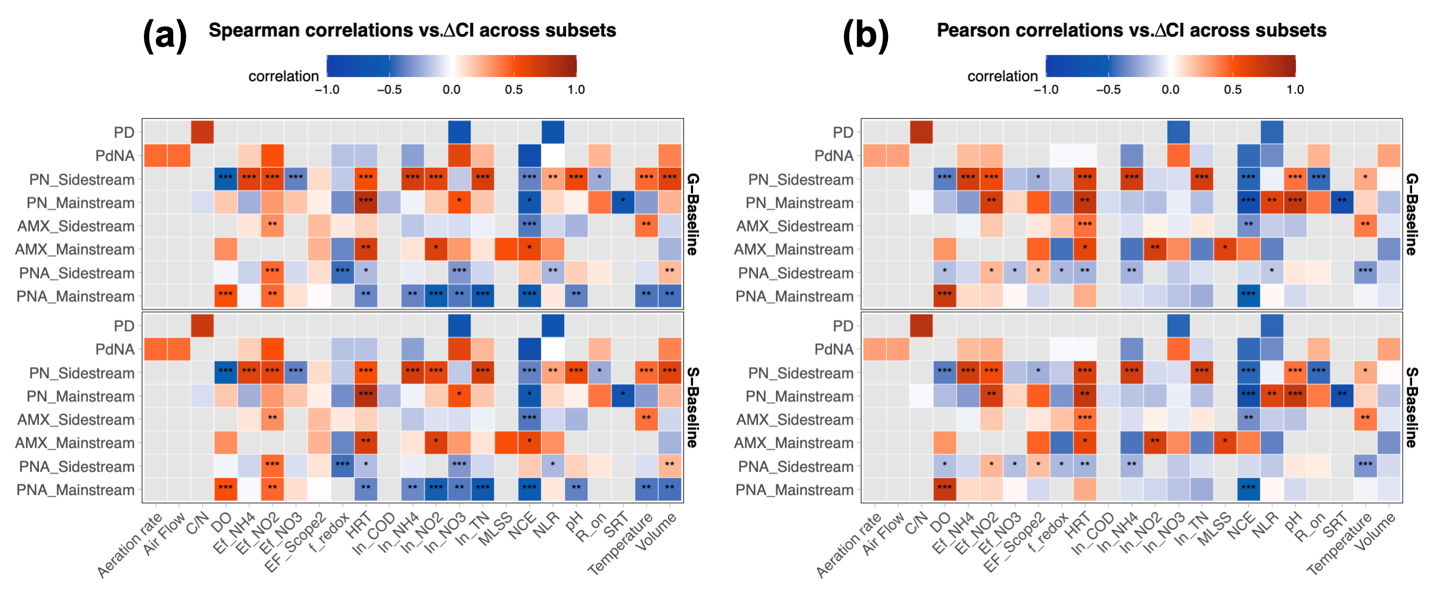


**Figure S4**: Correlation with *∆CI* across processes. (**a**) Pearson’s correlation. (**b**) Spearman’s correlation.

**
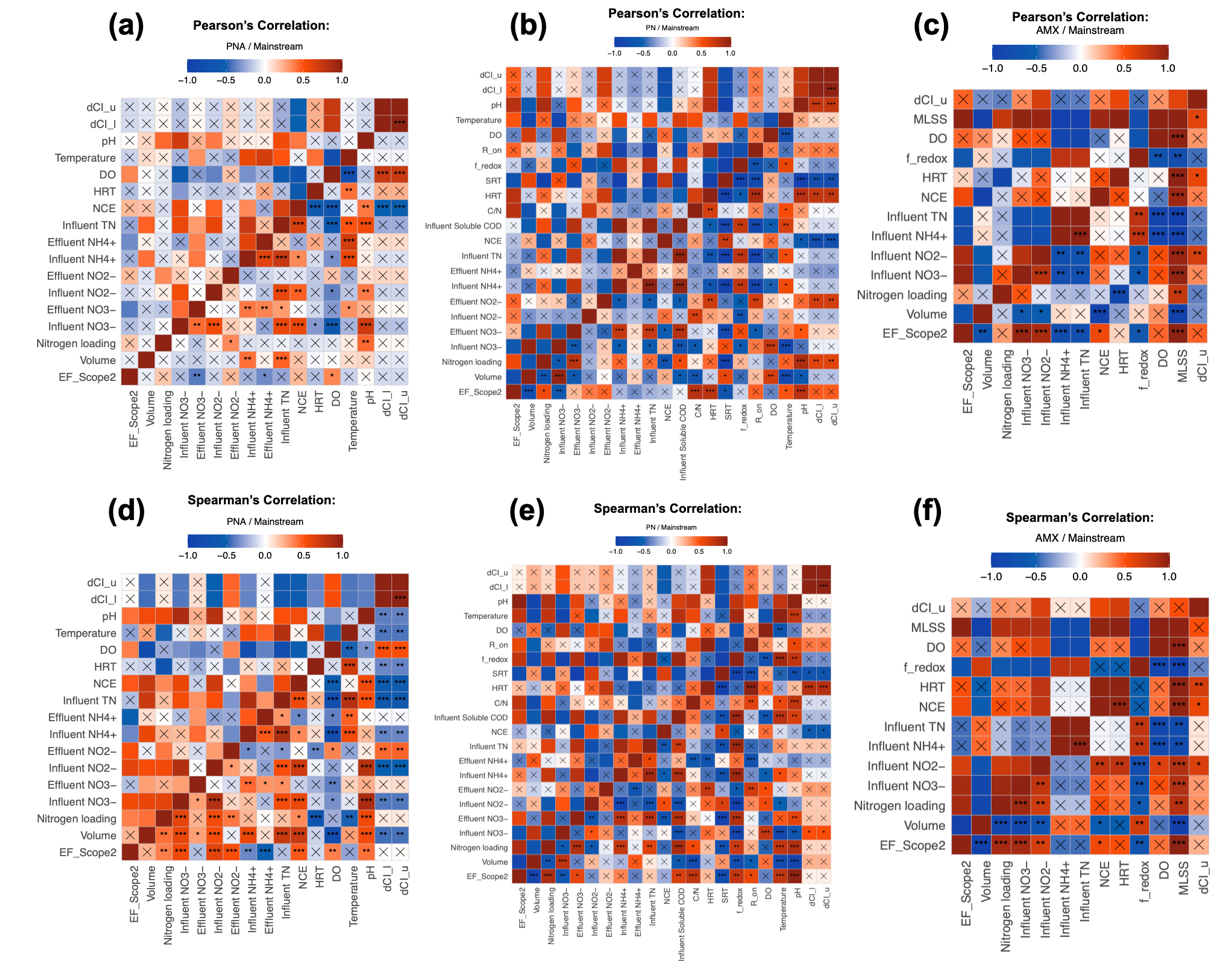
**

**
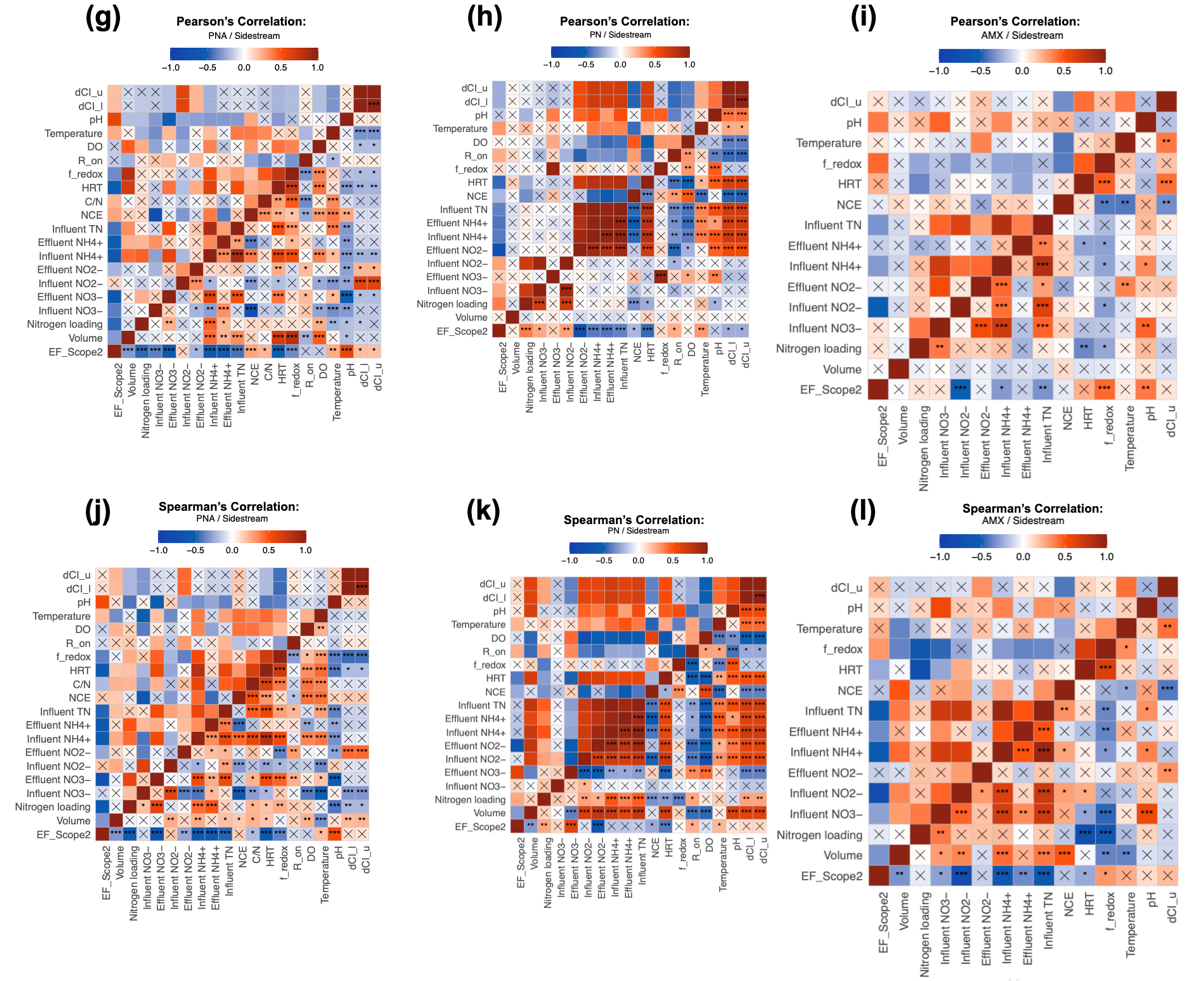
**

**
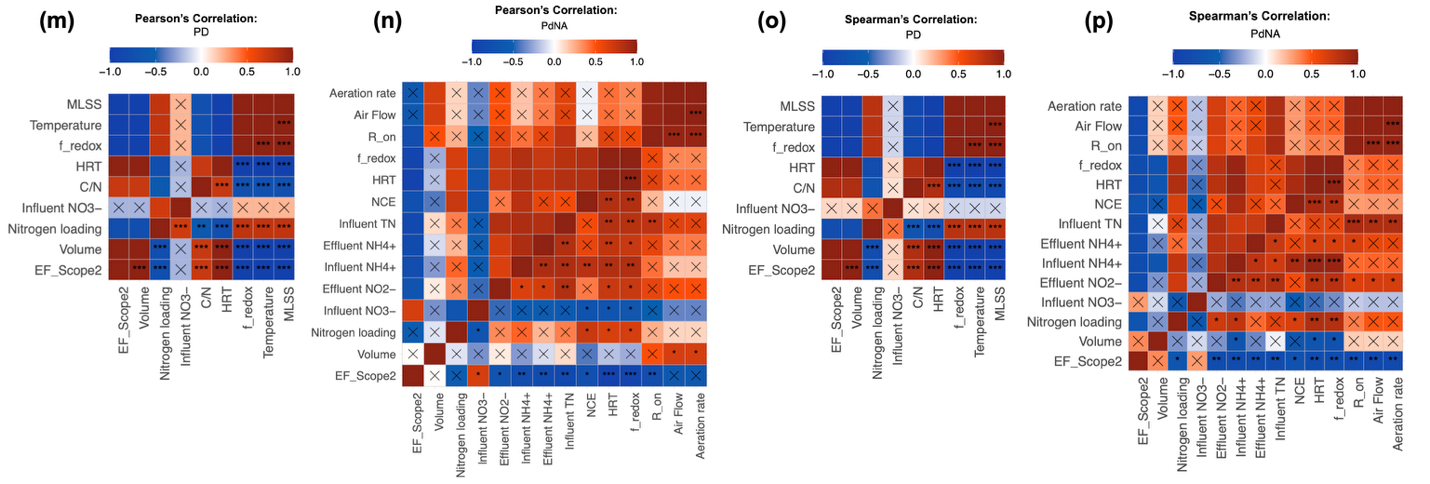
**

**Figure S5**: Pairwise correlation among all the variables with less than 30% missing values for each group of data with both Pearson’s and Spearman’s correlation.

4. Mixed-effects Regression

**
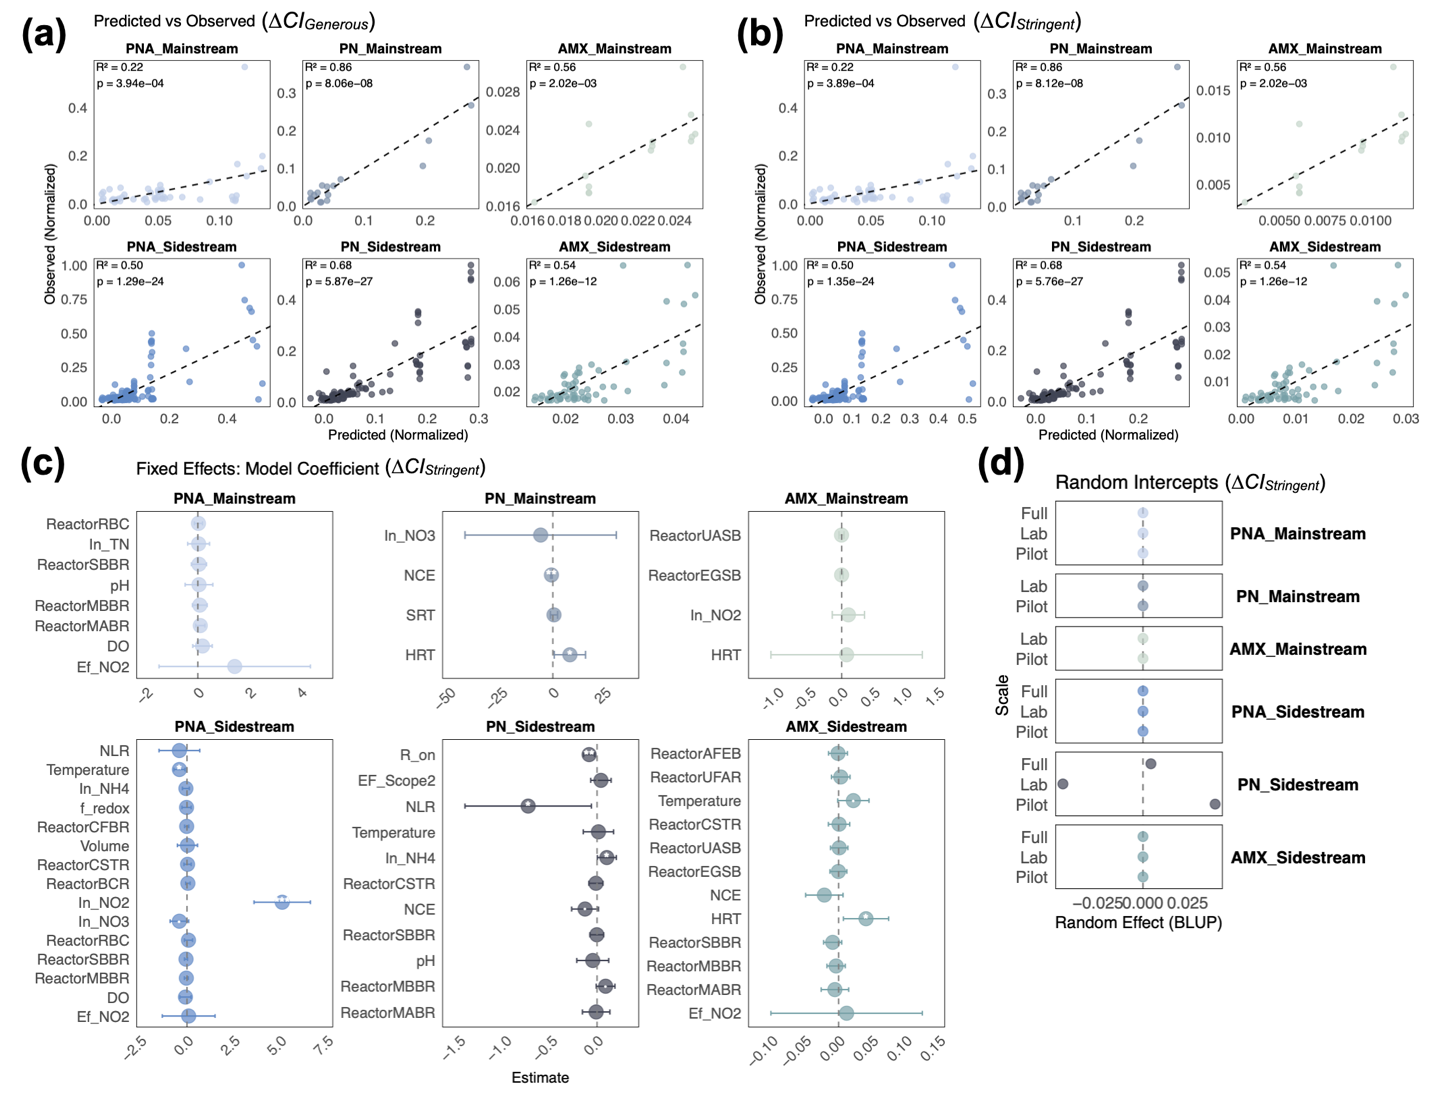
**

**Figure S6**: Mixed effects regression evaluation. (**a**) Group-specific regression performance for *∆CIGenerous*. (**b**) Group-specific regression performance for *∆CIStirngent*. (**c**) Fixed effects for model predictors of *∆CIStirngent*. (**d**) Random effect for the system scale in predicting *∆CIStirngent*.

**
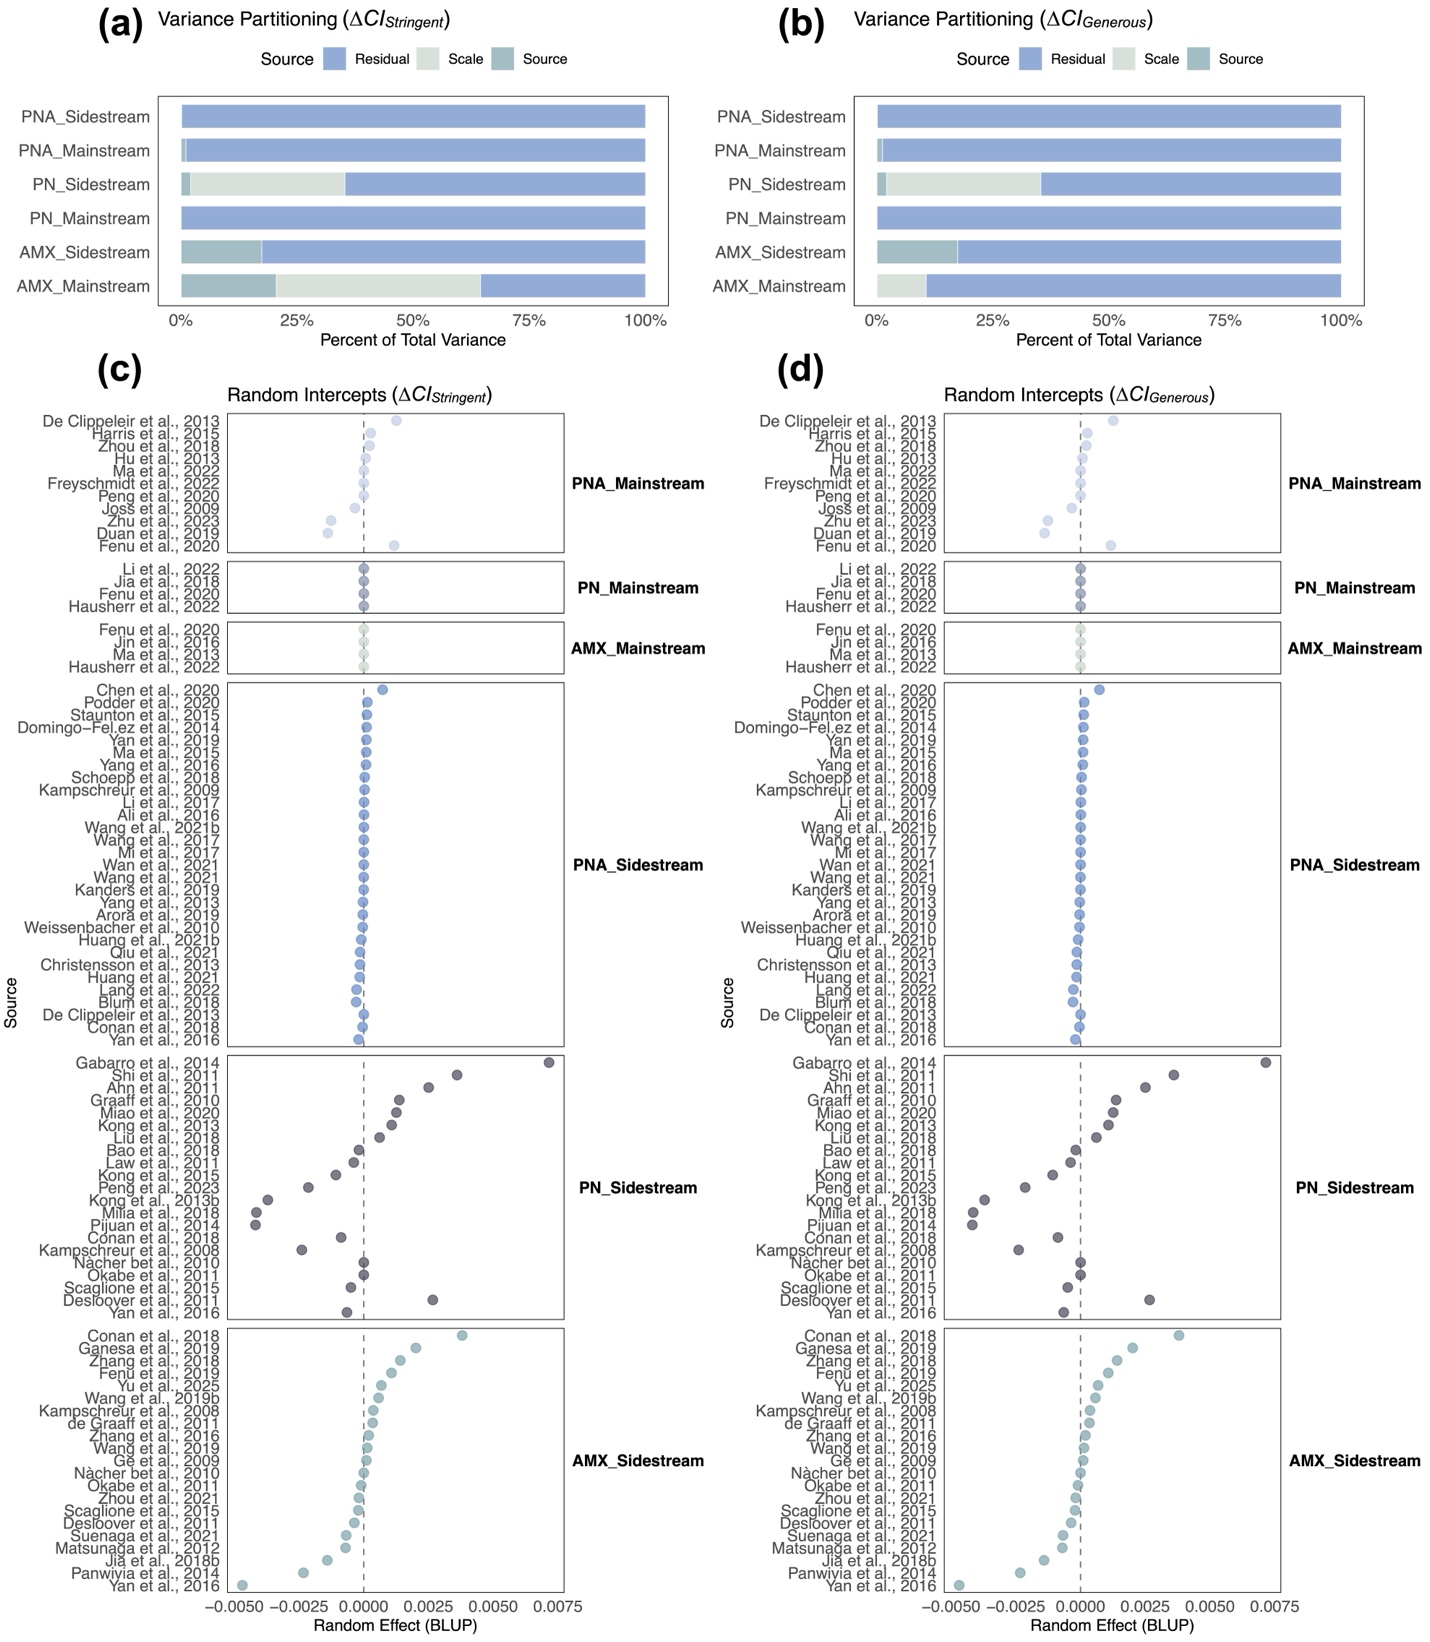
**

**Figure S7**: Variance partitioning of random variables in predicting (a) *∆CIStirngent* and (b) *∆CIGenerous*. Random effect for the system scale in predicting (c) *∆CIStirngent* and (d) *∆CIGenerous*.

1. Daigger GT, Boltz JP. Oxygen Transfer in Moving Bed Biofilm Reactor and Integrated Fixed Film Activated Sludge Processes. *Water Environment Research* **90**, 615-622 (2018).

2. Drewnowski J, Remiszewska-Skwarek A, Duda S, Łagód G. Aeration Process in Bioreactors as the Main Energy Consumer in a Wastewater Treatment Plant. Review of Solutions and Methods of Process Optimization (2019).

3. Bratu I, Stamelaki A. "Reduction of energy consumption by replacing surface aerators with fine bubble aeration in Slobozia Wastewater Treatment Plant, Romania". *Revista Romana de Inginerie Civila/Romanian Journal of Civil Engineering* **14**, 151-167 (2023).

4. Shukla BK, Sharma P, Goel A. Application of Membrane Aerated Biofilm Reactors in Treatment of Municipal and Industrial Wastewater: Present Trends, Challenges and Future Prospects. *Letters in Applied NanoBioScience* **14**, 17 (2024).

5. Guglielmi G, Coutts D, Houweling D, Peeters J. Full-scale application of mabr technology for upgrading and retrofitting an existing WWTP: Performances and process modelling. *Environmental Engineering and Management Journal* **19**, 1781-1789 (2020).
