# Supplementary material
Source: Research Square preprint supplement (doi:10.21203/rs.3.rs-9502209/v1)
Supplement: Supplementary file 1 [file 853fcf8b6a2d45aab7b5e831.xlsx]

## Sheet: Table S1
Keywords for N2O emission from wastewater
Anammox-related	GHG-related
anammox	greenhouse gas
partial nitrification-anammox	GHG
completely autotrophic nitrogen removal	nitrous oxide
deammonification	N2O
nitritation anammox	emission
autotrophic nitrogen removal	climate change
anaerobic ammonia oxidation	global warming
	carbon footprint
	tracer gas dispersion
	online monitoring
	flux chamber
	on site monitoring
	measurement
	float chamber
	off gas
	sensor

## Sheet: Table S2
Source	DOI	Scale	Configuration	Reactor	Reactor_short	Aeration Efficiency (kgO2/kWh)	Biomass	Biomass_short	Location	EF_Scope2 (kgCO2/kWh)	Volume (m3)	Biological Process	BP_short	Stoichiometric Oxygen Demand (kgO2/kgTN-remov)	Type of wastewater	Mitigation strategy	Nitrogen loading (original unit)	Nitrogen loading (kgN d-1)	Nitrogen loading (kgN m-3 d-1)	Influent NO3- (original unit)	Influent NO3- (mg/L)	Effluent NO3- (original unit)	Effluent NO3- (mg/L)	Influent NO2- (original unit)	Influent NO2- (mg/L)	Effluent NO2- (original unit)	Effluent NO2- (mg/L)	Influent NH4+ (original unit)	Influent NH4+ (mg/L)	Effluent NH4+ (original unit)	Effluent NH4+ (mg/L)	Influent TN (original unit)	Influent TN (mg/L)	TN removal (original unit)	Nitrogen Conversion Efficiency, NCE (%)	TN removal (kg)	N2O emission (original unit)	N2O accumulation (original unit)	N2O emission (kg)	N2O emission factor (original unit)	N2O emission factor (%, N2O-N/N removal)	N2O emission factor (%, N2O-N/TN-in)	N2O generation factor (original unit)	N2O generation factor (%, N2O-N/TN-removal)	N2O emission rate (original unit)	N2O emission rate (kg/m3/h)	Influent Alkalinity (mM)	Effluent Alkalinity (mM)	Influent COD (original unit)
Joss et al., 2009	10.1021/es900107w	Full	Single Stage	Sequencing Batch Reactor (SBR)	SBR	2.5	Flocculent Sludge (FS)	FS	Zurich, Switzerland	0.16	1400	Partial Nitrification / Anammox (PNA)	PNA	2.2	Domestic Wastewater	None	625	625	0.446429	0.2 (mg N L-1)	0.885714	5 mgN/L	22.1429	0.2 (mg N L-1)	0.657143	0.2 mgNO2-N/L	0.657143	650	835.714	30 mgN/L	38.5714	650.4	1099.18	output: NO3- 5, NO2- 0.2, NH4+ 30 mg N L-1	0.968	861.28	6.3 gN2O kgN removal -1	NA	5426.06	0.4% N2O-N/notrogen load	0.400909	0.4	NA	NA	0.16149	0.16149	NA	NA	300 mg O2 L-1
Blum et al., 2018	10.1016/j.cej.2017.10.146	Lab	Single Stage	Sequencing Batch Reactor (SBR)	SBR	2.5	Flocculent Sludge (FS)	FS	Lyngby, Denmark	0.076	0.004	Partial Nitrification / Anammox (PNA)	PNA	2.2	Synthetic Wastewater	Intermittent Aeration	900 mg NH4+-N*L‚àí1*d‚àí1	0.0036	0.9	45.1087	199.767	41.8478	185.326	NA	NA	NA	NA	303.371	390.048	288.202	370.546	345.219	345.219	330.05	0.0439	6.07e-05	0.761905	7.62e-07	7.62e-07	0.799102	0.91955	0.040404	NA	NA	2.38e-05	2.38e-05	NA	NA	0
Blum et al., 2018	10.1016/j.cej.2017.10.146	Lab	Single Stage	Sequencing Batch Reactor (SBR)	SBR	2.5	Flocculent Sludge (FS)	FS	Lyngby, Denmark	0.076	0.004	Partial Nitrification / Anammox (PNA)	PNA	2.2	Synthetic Wastewater	Intermittent Aeration	900 mg NH4+-N*L‚àí1*d‚àí1	0.0036	0.9	42.3913	187.733	43.4783	192.547	NA	NA	NA	NA	291.573	374.88	266.292	342.376	335.051	335.051	309.77	0.0755	0.000101124	0.714286	7.14e-07	7.14e-07	0.449495	0.502013	0.0378788	NA	NA	2.23e-05	2.23e-05	NA	NA	0
Blum et al., 2018	10.1016/j.cej.2017.10.146	Lab	Single Stage	Sequencing Batch Reactor (SBR)	SBR	2.5	Flocculent Sludge (FS)	FS	Lyngby, Denmark	0.076	0.004	Partial Nitrification / Anammox (PNA)	PNA	2.2	Synthetic Wastewater	Intermittent Aeration	900 mg NH4+-N*L‚àí1*d‚àí1	0.0036	0.9	42.9348	190.14	44.0217	194.953	NA	NA	NA	NA	269.663	346.709	246.067	316.372	313.685	313.685	290.09	0.0752	9.44e-05	0.707937	7.08e-07	7.08e-07	0.477321	0.499094	0.0375421	NA	NA	2.21e-05	2.21e-05	NA	NA	0
Blum et al., 2018	10.1016/j.cej.2017.10.146	Lab	Single Stage	Sequencing Batch Reactor (SBR)	SBR	2.5	Flocculent Sludge (FS)	FS	Lyngby, Denmark	0.076	0.004	Partial Nitrification / Anammox (PNA)	PNA	2.2	Synthetic Wastewater	Intermittent Aeration	900 mg NH4+-N*L‚àí1*d‚àí1	0.0036	0.9	44.5652	197.36	46.7391	206.988	NA	NA	NA	NA	246.067	316.372	225.843	290.369	292.807	292.807	272.58	0.0691	8.09e-05	0.707937	7.08e-07	7.08e-07	0.556874	0.543521	0.0375421	NA	NA	2.21e-05	2.21e-05	NA	NA	0
Blum et al., 2018	10.1016/j.cej.2017.10.146	Lab	Single Stage	Sequencing Batch Reactor (SBR)	SBR	2.5	Flocculent Sludge (FS)	FS	Lyngby, Denmark	0.076	0.004	Partial Nitrification / Anammox (PNA)	PNA	2.2	Synthetic Wastewater	Intermittent Aeration	900 mg NH4+-N*L‚àí1*d‚àí1	0.0036	0.9	47.2826	209.394	48.3696	214.208	NA	NA	NA	NA	227.528	292.536	208.989	268.7	275.898	275.898	257.36	0.0672	7.42e-05	0.687302	6.87e-07	6.87e-07	0.589792	0.542407	0.0364478	NA	NA	2.15e-05	2.15e-05	NA	NA	0
Blum et al., 2018	10.1016/j.cej.2017.10.146	Lab	Single Stage	Sequencing Batch Reactor (SBR)	SBR	2.5	Flocculent Sludge (FS)	FS	Lyngby, Denmark	0.076	0.004	Partial Nitrification / Anammox (PNA)	PNA	2.2	Synthetic Wastewater	Intermittent Aeration	900 mg NH4+-N*L‚àí1*d‚àí1	0.0036	0.9	48.3696	214.208	50.5435	223.835	NA	NA	NA	NA	210.674	270.867	190.449	244.864	261.218	261.218	240.99	0.0774	8.09e-05	0.64127	6.41e-07	6.41e-07	0.504433	0.439223	0.0340067	NA	NA	2e-05	2e-05	NA	NA	0
Blum et al., 2018	10.1016/j.cej.2017.10.146	Lab	Single Stage	Sequencing Batch Reactor (SBR)	SBR	2.5	Flocculent Sludge (FS)	FS	Lyngby, Denmark	0.076	0.004	Partial Nitrification / Anammox (PNA)	PNA	2.2	Synthetic Wastewater	Intermittent Aeration	900 mg NH4+-N*L‚àí1*d‚àí1	0.0036	0.9	50.5435	223.835	52.7174	233.463	NA	NA	NA	NA	188.764	242.697	168.539	216.693	241.481	241.481	221.26	0.0838	8.09e-05	0.577778	5.78e-07	5.78e-07	0.454489	0.365836	0.0306397	NA	NA	1.81e-05	1.81e-05	NA	NA	0
Blum et al., 2018	10.1016/j.cej.2017.10.146	Lab	Single Stage	Sequencing Batch Reactor (SBR)	SBR	2.5	Flocculent Sludge (FS)	FS	Lyngby, Denmark	0.076	0.004	Partial Nitrification / Anammox (PNA)	PNA	2.2	Synthetic Wastewater	Intermittent Aeration	900 mg NH4+-N*L‚àí1*d‚àí1	0.0036	0.9	53.8043	238.276	54.3478	240.683	NA	NA	NA	NA	170.225	218.86	144.944	186.356	224.573	224.573	199.29	0.1126	0.000101124	0.520635	5.21e-07	5.21e-07	0.327632	0.245257	0.0276094	NA	NA	1.63e-05	1.63e-05	NA	NA	0
Blum et al., 2018	10.1016/j.cej.2017.10.146	Lab	Single Stage	Sequencing Batch Reactor (SBR)	SBR	2.5	Flocculent Sludge (FS)	FS	Lyngby, Denmark	0.076	0.004	Partial Nitrification / Anammox (PNA)	PNA	2.2	Synthetic Wastewater	Intermittent Aeration	900 mg NH4+-N*L‚àí1*d‚àí1	0.0036	0.9	54.8913	243.09	55.4348	245.497	NA	NA	NA	NA	143.258	184.189	128.09	164.687	198.693	198.693	183.52	0.0763	6.07e-05	0.452381	4.52e-07	4.52e-07	0.474467	0.314245	0.0239899	NA	NA	1.41e-05	1.41e-05	NA	NA	0
Blum et al., 2018	10.1016/j.cej.2017.10.146	Lab	Single Stage	Sequencing Batch Reactor (SBR)	SBR	2.5	Flocculent Sludge (FS)	FS	Lyngby, Denmark	0.076	0.004	Partial Nitrification / Anammox (PNA)	PNA	2.2	Synthetic Wastewater	Intermittent Aeration	900 mg NH4+-N*L‚àí1*d‚àí1	0.0036	0.9	57.0652	252.717	57.6087	255.124	NA	NA	NA	NA	129.775	166.854	104.494	134.35	187.384	187.384	162.1	0.1349	0.000101124	0.404762	4.05e-07	4.05e-07	0.254714	0.159098	0.0214646	NA	NA	1.26e-05	1.26e-05	NA	NA	0
Blum et al., 2018	10.1016/j.cej.2017.10.146	Lab	Single Stage	Sequencing Batch Reactor (SBR)	SBR	2.5	Flocculent Sludge (FS)	FS	Lyngby, Denmark	0.076	0.004	Partial Nitrification / Anammox (PNA)	PNA	2.2	Synthetic Wastewater	Intermittent Aeration	900 mg NH4+-N*L‚àí1*d‚àí1	0.0036	0.9	58.1522	257.531	60.8696	269.565	NA	NA	NA	NA	102.809	132.183	80.8989	104.013	163.679	163.679	141.77	0.1339	8.76e-05	0.298413	2.98e-07	2.98e-07	0.21668	0.118219	0.0158249	NA	NA	9.33e-06	9.33e-06	NA	NA	0
Blum et al., 2018	10.1016/j.cej.2017.10.146	Lab	Single Stage	Sequencing Batch Reactor (SBR)	SBR	2.5	Flocculent Sludge (FS)	FS	Lyngby, Denmark	0.076	0.004	Partial Nitrification / Anammox (PNA)	PNA	2.2	Synthetic Wastewater	Intermittent Aeration	900 mg NH4+-N*L‚àí1*d‚àí1	0.0036	0.9	60.8696	269.565	63.0435	279.193	NA	NA	NA	NA	82.5843	106.18	58.9888	75.8427	145.628	145.628	122.03	0.162	9.44e-05	0.179365	1.79e-07	1.79e-07	0.120936	0.0587052	0.00951179	NA	NA	5.61e-06	5.61e-06	NA	NA	0
Blum et al., 2018	10.1016/j.cej.2017.10.146	Lab	Single Stage	Sequencing Batch Reactor (SBR)	SBR	2.5	Flocculent Sludge (FS)	FS	Lyngby, Denmark	0.076	0.004	Partial Nitrification / Anammox (PNA)	PNA	2.2	Synthetic Wastewater	Intermittent Aeration	900 mg NH4+-N*L‚àí1*d‚àí1	0.0036	0.9	63.0435	279.193	65.7609	291.227	NA	NA	NA	NA	57.3034	73.6758	37.0787	47.6726	123.064	123.064	102.84	0.1643	8.09e-05	0.168254	1.68e-07	1.68e-07	0.132351	0.0542924	0.00892256	NA	NA	5.26e-06	5.26e-06	NA	NA	0
Blum et al., 2018	10.1016/j.cej.2017.10.146	Lab	Single Stage	Sequencing Batch Reactor (SBR)	SBR	2.5	Flocculent Sludge (FS)	FS	Lyngby, Denmark	0.076	0.004	Partial Nitrification / Anammox (PNA)	PNA	2.2	Synthetic Wastewater	Intermittent Aeration	900 mg NH4+-N*L‚àí1*d‚àí1	0.0036	0.9	66.3043	293.634	67.9348	300.854	NA	NA	NA	NA	37.0787	47.6726	15.1685	19.5024	105.013	105.013	83.1	0.2086	8.76e-05	0.228571	2.29e-07	2.29e-07	0.165967	0.058096	0.0121212	NA	NA	7.14e-06	7.14e-06	NA	NA	0
Blum et al., 2018	10.1016/j.cej.2017.10.146	Lab	Single Stage	Sequencing Batch Reactor (SBR)	SBR	2.5	Flocculent Sludge (FS)	FS	Lyngby, Denmark	0.076	0.004	Partial Nitrification / Anammox (PNA)	PNA	2.2	Synthetic Wastewater	Intermittent Aeration	900 mg NH4+-N*L‚àí1*d‚àí1	0.0036	0.9	67.9348	300.854	70.6522	312.888	NA	NA	NA	NA	15.1685	19.5024	5.05618	6.5008	85.8207	85.8207	75.71	0.1178	4.04e-05	0.112698	1.13e-07	1.13e-07	0.177301	0.0507203	0.00597643	NA	NA	3.52e-06	3.52e-06	NA	NA	0
Blum et al., 2018	10.1016/j.cej.2017.10.146	Lab	Single Stage	Sequencing Batch Reactor (SBR)	SBR	2.5	Flocculent Sludge (FS)	FS	Lyngby, Denmark	0.076	0.004	Partial Nitrification / Anammox (PNA)	PNA	2.2	Synthetic Wastewater	Intermittent Aeration	900 mg NH4+-N*L‚àí1*d‚àí1	0.0036	0.9	64.3777	285.101	60.0858	266.094	0.208696	0.685714	0.0521739	0.171429	11.1111	14.2857	72.2222	92.8571	71.4056	71.4056	132.36	-0.8536	0.000243818	1.31173	1.31e-06	1.31e-06	0.34236	-0.244465	0.208684	NA	NA	0.000122975	0.000122975	NA	NA	0
Blum et al., 2018	10.1016/j.cej.2017.10.146	Lab	Single Stage	Sequencing Batch Reactor (SBR)	SBR	2.5	Flocculent Sludge (FS)	FS	Lyngby, Denmark	0.076	0.004	Partial Nitrification / Anammox (PNA)	PNA	2.2	Synthetic Wastewater	Intermittent Aeration	900 mg NH4+-N*L‚àí1*d‚àí1	0.0036	0.9	60.0858	266.094	60.515	267.995	0.104348	0.342857	0.313043	1.02857	72.2222	92.8571	61.5385	79.1209	132.842	132.842	122.37	0.0789	4.19e-05	1.11672	1.12e-06	1.12e-06	1.69602	2.25302	0.177659	NA	NA	0.000104692	0.000104692	NA	NA	0
Blum et al., 2018	10.1016/j.cej.2017.10.146	Lab	Single Stage	Sequencing Batch Reactor (SBR)	SBR	2.5	Flocculent Sludge (FS)	FS	Lyngby, Denmark	0.076	0.004	Partial Nitrification / Anammox (PNA)	PNA	2.2	Synthetic Wastewater	Intermittent Aeration	900 mg NH4+-N*L‚àí1*d‚àí1	0.0036	0.9	60.515	267.995	61.8026	273.697	0.313043	1.02857	0.286957	0.942857	61.9658	79.6703	44.4444	57.1429	124.081	124.081	106.53	0.1414	7.02e-05	0.708211	7.08e-07	7.08e-07	0.642087	0.796711	0.11267	NA	NA	6.64e-05	6.64e-05	NA	NA	0
Blum et al., 2018	10.1016/j.cej.2017.10.146	Lab	Single Stage	Sequencing Batch Reactor (SBR)	SBR	2.5	Flocculent Sludge (FS)	FS	Lyngby, Denmark	0.076	0.004	Partial Nitrification / Anammox (PNA)	PNA	2.2	Synthetic Wastewater	Intermittent Aeration	900 mg NH4+-N*L‚àí1*d‚àí1	0.0036	0.9	61.8026	273.697	62.6609	277.498	0.313043	1.02857	0.234783	0.771429	44.4444	57.1429	25.641	32.967	107.418	107.418	88.54	0.1758	7.55e-05	0.332551	3.33e-07	3.33e-07	0.280197	0.300983	0.0529059	NA	NA	3.12e-05	3.12e-05	NA	NA	0
Blum et al., 2018	10.1016/j.cej.2017.10.146	Lab	Single Stage	Sequencing Batch Reactor (SBR)	SBR	2.5	Flocculent Sludge (FS)	FS	Lyngby, Denmark	0.076	0.004	Partial Nitrification / Anammox (PNA)	PNA	2.2	Synthetic Wastewater	Intermittent Aeration	900 mg NH4+-N*L‚àí1*d‚àí1	0.0036	0.9	63.5193	281.3	65.6652	290.803	0.208696	0.685714	0.234783	0.771429	26.0684	33.5165	10.6838	13.7363	91.9423	91.9423	76.58	0.167	6.14e-05	0.0533724	5.34e-08	5.34e-08	0.0552857	0.0508309	0.00849107	NA	NA	5e-06	5e-06	NA	NA	0
Liu et al., 2018	10.1039/c8ra03032d	Lab	Single Stage	Sequencing Batch Reactor (SBR)	SBR	2.5	Flocculent Sludge (FS)	FS	Jinan, China	0.6838	0.006	Partial Nitrification (PN)	PN	3.43	Synthetic Wastewater	None	450 mg NH4 /L, 12 h HRT, 50% fresh exchange ratio	0.00315	0.525	0	0	53	53	0	0	250	250	450 mg/L	450	225	225	450 mg/L NH4+	350	effluent: NH4 225 mg/L, NO2- 250 mg/L, NO3- 53 mg/L	0.5	0.000521672	8.9325	19.3243	5.36e-08	0.0370429	3.45945	1.72972	NA	NA	4.51e-10	0.000594593	NA	NA	0
de Graaff et al., 2011	10.1016/j.watres.2010.08.010	Lab	Single Stage	Sequencing Batch Reactor (SBR)	SBR	2.5	Flocculent Sludge (FS)	FS	Leeuwarden, The Netherlands	0.442	0.005	Anammox (AMX)	AMX	0	Black Water	None	0.3799308 gN/L/d	0.0018995	0.3799	6	6	0.11 NO3-N/NH4-N produced (mol/mol)	48.1872	483	483	25.6410256 mgNO2-N/L	84.2491	408	408	94% removal	383.52	897	897	0.32802768 gN/L/d	0.8634	0.00082	3.06e-05	3.06e-05	3.06e-05	1.02418605 (N2O%of TN load)	1.18603	1.024	NA	NA	0.000509428	0.000509428	NA	NA	459
de Graaff et al., 2011	10.1016/j.watres.2010.08.010	Lab	Single Stage	Sequencing Batch Reactor (SBR)	SBR	2.5	Flocculent Sludge (FS)	FS	Leeuwarden, The Netherlands	0.442	0.005	Anammox (AMX)	AMX	0	Black Water	None	0.313495	0.00156747	0.313495	6	6	0.11	48.1872	483	483	19.7669	64.9484	408	408	0.94	383.52	897	897	0.276125	0.8808	0.000690311	2.19e-05	5.25e-05	2.19e-05	0.890233	1.01072	0.890233	NA	NA	0.000365466	0.000365466	NA	NA	459
de Graaff et al., 2011	10.1016/j.watres.2010.08.010	Lab	Single Stage	Sequencing Batch Reactor (SBR)	SBR	2.5	Flocculent Sludge (FS)	FS	Leeuwarden, The Netherlands	0.442	0.005	Anammox (AMX)	AMX	0	Black Water	None	0.266782	0.00133391	0.266782	6	6	0.11	48.1872	483	483	1.95804	6.43357	408	408	0.94	383.52	897	897	0.239792	0.8988	0.000599481	8.25e-06	6.07e-05	8.25e-06	0.393488	0.437777	0.393488	NA	NA	0.000137468	0.000137468	NA	NA	459
de Graaff et al., 2011	10.1016/j.watres.2010.08.010	Lab	Single Stage	Sequencing Batch Reactor (SBR)	SBR	2.5	Flocculent Sludge (FS)	FS	Leeuwarden, The Netherlands	0.442	0.005	Anammox (AMX)	AMX	0	Black Water	None	0.343599	0.00171799	0.343599	6	6	0.11	48.1872	483	483	0.745921	2.45088	408	408	0.94	383.52	897	897	0.313495	0.9124	0.000783737	1.96e-06	6.27e-05	1.96e-06	0.0725581	0.0795256	0.0725581	NA	NA	3.26e-05	3.26e-05	NA	NA	459
de Graaff et al., 2011	10.1016/j.watres.2010.08.010	Lab	Single Stage	Sequencing Batch Reactor (SBR)	SBR	2.5	Flocculent Sludge (FS)	FS	Leeuwarden, The Netherlands	0.442	0.005	Anammox (AMX)	AMX	0	Black Water	None	0.0861592	0.000430796	0.0861592	6	6	0.11	48.1872	483	483	6.15385	20.2198	408	408	0.94	383.52	897	897	0.0778547	0.9036	0.000194637	5.48e-06	6.82e-05	5.48e-06	0.809302	0.895628	0.809302	NA	NA	9.13e-05	9.13e-05	NA	NA	459
de Graaff et al., 2011	10.1016/j.watres.2010.08.010	Lab	Single Stage	Sequencing Batch Reactor (SBR)	SBR	2.5	Flocculent Sludge (FS)	FS	Leeuwarden, The Netherlands	0.442	0.005	Anammox (AMX)	AMX	0	Black Water	None	0.110035	0.000550173	0.110035	6	6	0.11	49.9824	483	483	2.98368	9.80353	408	408	0.98	399.84	897	897	0.102768	0.934	0.00025692	4.9e-06	7.31e-05	4.9e-06	0.566512	0.606568	0.566512	NA	NA	8.16e-05	8.16e-05	NA	NA	459
de Graaff et al., 2011	10.1016/j.watres.2010.08.010	Lab	Single Stage	Sequencing Batch Reactor (SBR)	SBR	2.5	Flocculent Sludge (FS)	FS	Leeuwarden, The Netherlands	0.442	0.005	Anammox (AMX)	AMX	0	Black Water	None	0.1391	0.000695502	0.1391	6	6	0.11	49.9824	483	483	0.37296	1.22544	408	408	0.98	399.84	897	897	0.126644	0.9104	0.000316609	2.1e-06	7.52e-05	2.1e-06	0.192558	0.211498	0.192558	NA	NA	3.51e-05	3.51e-05	NA	NA	459
de Graaff et al., 2011	10.1016/j.watres.2010.08.010	Lab	Single Stage	Sequencing Batch Reactor (SBR)	SBR	2.5	Flocculent Sludge (FS)	FS	Leeuwarden, The Netherlands	0.442	0.005	Anammox (AMX)	AMX	0	Black Water	None	0.174394	0.000871972	0.174394	6	6	0.11	49.9824	483	483	0.839161	2.75724	408	408	0.98	399.84	897	897	0.157785	0.9048	0.000394464	9.94e-07	7.62e-05	9.94e-07	0.0725581	0.0801958	0.0725581	NA	NA	1.66e-05	1.66e-05	NA	NA	459
de Graaff et al., 2011	10.1016/j.watres.2010.08.010	Lab	Single Stage	Sequencing Batch Reactor (SBR)	SBR	2.5	Flocculent Sludge (FS)	FS	Leeuwarden, The Netherlands	0.442	0.005	Anammox (AMX)	AMX	0	Black Water	None	0.207612	0.00103806	0.207612	6	6	0.11	49.9824	483	483	1.30536	4.28904	408	408	0.98	399.84	897	897	0.189965	0.915	0.000474914	3.19e-07	7.65e-05	3.19e-07	0.0195349	0.0213496	0.0195349	NA	NA	5.31e-06	5.31e-06	NA	NA	459
de Graaff et al., 2011	10.1016/j.watres.2010.08.010	Lab	Single Stage	Sequencing Batch Reactor (SBR)	SBR	2.5	Flocculent Sludge (FS)	FS	Leeuwarden, The Netherlands	0.442	0.004	Anammox (AMX)	AMX	0	Black Water	None	0.441176	0.00176471	0.441176	6	6	0.15	62.304	483	483	0.263158	0.864662	408	408	0.92	375.36	897	897	0.392017	0.8886	0.000784034	1.09e-07	1.09e-07	1.09e-07	0.00392157	0.00441334	0.00392157	NA	NA	2.27e-06	2.27e-06	NA	NA	459
de Graaff et al., 2011	10.1016/j.watres.2010.08.010	Lab	Single Stage	Sequencing Batch Reactor (SBR)	SBR	2.5	Flocculent Sludge (FS)	FS	Leeuwarden, The Netherlands	0.442	0.004	Anammox (AMX)	AMX	0	Black Water	None	0.341597	0.00136639	0.341597	6	6	0.15	62.304	483	483	0.902256	2.96455	408	408	0.92	375.36	897	897	0.291176	0.8524	0.000582353	8.42e-08	1.93e-07	8.42e-08	0.00392157	0.00460063	0.00392157	NA	NA	1.75e-06	1.75e-06	NA	NA	459
de Graaff et al., 2011	10.1016/j.watres.2010.08.010	Lab	Single Stage	Sequencing Batch Reactor (SBR)	SBR	2.5	Flocculent Sludge (FS)	FS	Leeuwarden, The Netherlands	0.442	0.004	Anammox (AMX)	AMX	0	Black Water	None	0.390756	0.00156303	0.390756	6	6	0.15	62.304	483	483	6.16541	20.2578	408	408	0.92	375.36	897	897	0.340336	0.871	0.000680672	5.78e-06	NA	5.78e-06	0.235294	0.270153	0.235294	NA	NA	0.000120401	0.000120401	NA	NA	459
Chen et al., 2020	10.1016/j.jclepro.2020.120667	Lab	Single Stage	Sequencing Batch Reactor (SBR)	SBR	2.5	Flocculent Sludge (FS)	FS	Xiamen, China	0.4711	0.012	Partial Nitrification / Anammox (PNA)	PNA	2.2	Synthetic Wastewater	None	0.2 gN/L/d	0.0024	0.2	17.3743	17.3743	26.925	26.925	164.179	164.179	100.329	100.329	68.014	68.014	59.0207	59.0207	249.568	249.568	0.08 gN/L/d	0.4	0.00024	0.32085561 ppm	NA	5.28e-07	0.22	0.601604	0.240642	NA	NA	0.32085561 ppm	3.15e-05	NA	NA	0
Chen et al., 2020	10.1016/j.jclepro.2020.120667	Lab	Single Stage	Sequencing Batch Reactor (SBR)	SBR	2.5	Flocculent Sludge (FS)	FS	Xiamen, China	0.4711	0.012	Partial Nitrification / Anammox (PNA)	PNA	2.2	Synthetic Wastewater	None	0.2	0.0024	0.2	11.706	11.706	26.925	26.925	137.025	137.025	100.329	100.329	86.3856	86.3856	59.0207	59.0207	235.117	235.117	0.08	0.4	0.00024	52.8342	NA	5.28e-07	0.22	99.0642	39.6257	NA	NA	52.8342	0.00518908	NA	NA	0
Chen et al., 2020	10.1016/j.jclepro.2020.120667	Lab	Single Stage	Sequencing Batch Reactor (SBR)	SBR	2.5	Flocculent Sludge (FS)	FS	Xiamen, China	0.4711	0.012	Partial Nitrification / Anammox (PNA)	PNA	2.2	Synthetic Wastewater	None	0.2	0.0024	0.2	12.6422	12.6422	26.925	26.925	141.032	141.032	100.329	100.329	77.0939	77.0939	59.0207	59.0207	230.768	230.768	0.08	0.4	0.00024	39.1444	NA	5.28e-07	0.22	73.3957	29.3583	NA	NA	39.1444	0.00384454	NA	NA	0
Chen et al., 2020	10.1016/j.jclepro.2020.120667	Lab	Single Stage	Sequencing Batch Reactor (SBR)	SBR	2.5	Flocculent Sludge (FS)	FS	Xiamen, China	0.4711	0.012	Partial Nitrification / Anammox (PNA)	PNA	2.2	Synthetic Wastewater	None	0.2	0.0024	0.2	16.6498	16.6498	26.925	26.925	149.643	149.643	100.329	100.329	67.801	67.801	59.0207	59.0207	234.094	234.094	0.08	0.4	0.00024	36.0428	NA	5.28e-07	0.22	67.5802	27.0321	NA	NA	36.0428	0.00353992	NA	NA	0
Chen et al., 2020	10.1016/j.jclepro.2020.120667	Lab	Single Stage	Sequencing Batch Reactor (SBR)	SBR	2.5	Flocculent Sludge (FS)	FS	Xiamen, China	0.4711	0.012	Partial Nitrification / Anammox (PNA)	PNA	2.2	Synthetic Wastewater	None	0.2	0.0024	0.2	15.0725	15.0725	26.925	26.925	152.158	152.158	100.329	100.329	62.1316	62.1316	59.0207	59.0207	229.362	229.362	0.08	0.4	0.00024	34.6524	NA	5.28e-07	0.22	64.9733	25.9893	NA	NA	34.6524	0.00340336	NA	NA	0
Chen et al., 2020	10.1016/j.jclepro.2020.120667	Lab	Single Stage	Sequencing Batch Reactor (SBR)	SBR	2.5	Flocculent Sludge (FS)	FS	Xiamen, China	0.4711	0.012	Partial Nitrification / Anammox (PNA)	PNA	2.2	Synthetic Wastewater	None	0.2	0.0024	0.2	14.5181	14.5181	26.925	26.925	154.161	154.161	100.329	100.329	64.6451	64.6451	59.0207	59.0207	233.324	233.324	0.08	0.4	0.00024	23.5294	NA	5.28e-07	0.22	44.1176	17.6471	NA	NA	23.5294	0.00231092	NA	NA	0
Chen et al., 2020	10.1016/j.jclepro.2020.120667	Lab	Single Stage	Sequencing Batch Reactor (SBR)	SBR	2.5	Flocculent Sludge (FS)	FS	Xiamen, China	0.4711	0.012	Partial Nitrification / Anammox (PNA)	PNA	2.2	Synthetic Wastewater	None	0.2	0.0024	0.2	16.5214	16.5214	26.925	26.925	160.769	160.769	100.329	100.329	55.909	55.909	59.0207	59.0207	233.199	233.199	0.08	0.4	0.00024	21.0695	NA	5.28e-07	0.22	39.5053	15.8021	NA	NA	21.0695	0.00206933	NA	NA	0
Chen et al., 2020	10.1016/j.jclepro.2020.120667	Lab	Single Stage	Sequencing Batch Reactor (SBR)	SBR	2.5	Flocculent Sludge (FS)	FS	Xiamen, China	0.4711	0.012	Partial Nitrification / Anammox (PNA)	PNA	2.2	Synthetic Wastewater	None	0.2	0.0024	0.2	20.0163	20.0163	26.925	26.925	170.401	170.401	100.329	100.329	55.8221	55.8221	59.0207	59.0207	246.239	246.239	0.08	0.4	0.00024	6.52406	NA	5.28e-07	0.22	12.2326	4.89305	NA	NA	6.52406	0.000640756	NA	NA	0
Chen et al., 2020	10.1016/j.jclepro.2020.120667	Lab	Single Stage	Sequencing Batch Reactor (SBR)	SBR	2.5	Flocculent Sludge (FS)	FS	Xiamen, China	0.4711	0.012	Partial Nitrification / Anammox (PNA)	PNA	2.2	Synthetic Wastewater	None	0.2	0.0024	0.2	16.9231	16.9231	29.8888	29.8888	1.53846	1.53846	4.16667	4.16667	62.5641	62.5641	61.15	61.15	81.0256	81.0256	0.11	0.55	0.00033	2.13904	NA	3.3e-08	0.01	1.45843	0.802139	NA	NA	2.13904	0.000105042	NA	NA	0
Chen et al., 2020	10.1016/j.jclepro.2020.120667	Lab	Single Stage	Sequencing Batch Reactor (SBR)	SBR	2.5	Flocculent Sludge (FS)	FS	Xiamen, China	0.4711	0.012	Partial Nitrification / Anammox (PNA)	PNA	2.2	Synthetic Wastewater	None	0.2	0.0024	0.2	14.359	14.359	29.8888	29.8888	1.53846	1.53846	4.16667	4.16667	94.8718	94.8718	61.15	61.15	110.769	110.769	0.11	0.55	0.00033	1.17647	NA	3.3e-08	0.01	0.802139	0.441176	NA	NA	1.17647	5.78e-05	NA	NA	0
Chen et al., 2020	10.1016/j.jclepro.2020.120667	Lab	Single Stage	Sequencing Batch Reactor (SBR)	SBR	2.5	Flocculent Sludge (FS)	FS	Xiamen, China	0.4711	0.012	Partial Nitrification / Anammox (PNA)	PNA	2.2	Synthetic Wastewater	None	0.2	0.0024	0.2	18.9744	18.9744	29.8888	29.8888	1.53846	1.53846	4.16667	4.16667	90.7692	90.7692	61.15	61.15	111.282	111.282	0.11	0.55	0.00033	1.06952	NA	3.3e-08	0.01	0.729217	0.40107	NA	NA	1.06952	5.25e-05	NA	NA	0
Chen et al., 2020	10.1016/j.jclepro.2020.120667	Lab	Single Stage	Sequencing Batch Reactor (SBR)	SBR	2.5	Flocculent Sludge (FS)	FS	Xiamen, China	0.4711	0.012	Partial Nitrification / Anammox (PNA)	PNA	2.2	Synthetic Wastewater	None	0.2	0.0024	0.2	25.1282	25.1282	29.8888	29.8888	1.02564	1.02564	4.16667	4.16667	84.6154	84.6154	61.15	61.15	110.769	110.769	0.11	0.55	0.00033	1.60428	NA	3.3e-08	0.01	1.09383	0.601604	NA	NA	1.60428	7.88e-05	NA	NA	0
Chen et al., 2020	10.1016/j.jclepro.2020.120667	Lab	Single Stage	Sequencing Batch Reactor (SBR)	SBR	2.5	Flocculent Sludge (FS)	FS	Xiamen, China	0.4711	0.012	Partial Nitrification / Anammox (PNA)	PNA	2.2	Synthetic Wastewater	None	0.2	0.0024	0.2	16.9231	16.9231	29.8888	29.8888	1.02564	1.02564	4.16667	4.16667	75.8974	75.8974	61.15	61.15	93.8462	93.8462	0.11	0.55	0.00033	2.03209	NA	3.3e-08	0.01	1.38551	0.762032	NA	NA	2.03209	9.98e-05	NA	NA	0
Chen et al., 2020	10.1016/j.jclepro.2020.120667	Lab	Single Stage	Sequencing Batch Reactor (SBR)	SBR	2.5	Flocculent Sludge (FS)	FS	Xiamen, China	0.4711	0.012	Partial Nitrification / Anammox (PNA)	PNA	2.2	Synthetic Wastewater	None	0.2	0.0024	0.2	18.9744	18.9744	29.8888	29.8888	2.5641	2.5641	4.16667	4.16667	76.4103	76.4103	61.15	61.15	97.9487	97.9487	0.11	0.55	0.00033	1.49733	NA	3.3e-08	0.01	1.0209	0.561497	NA	NA	1.49733	7.35e-05	NA	NA	0
Chen et al., 2020	10.1016/j.jclepro.2020.120667	Lab	Single Stage	Sequencing Batch Reactor (SBR)	SBR	2.5	Flocculent Sludge (FS)	FS	Xiamen, China	0.4711	0.012	Partial Nitrification / Anammox (PNA)	PNA	2.2	Synthetic Wastewater	None	0.2	0.0024	0.2	20.5128	20.5128	29.8888	29.8888	1.02564	1.02564	4.16667	4.16667	74.8718	74.8718	61.15	61.15	96.4103	96.4103	0.11	0.55	0.00033	1.28342	NA	3.3e-08	0.01	0.875061	0.481283	NA	NA	1.28342	6.3e-05	NA	NA	0
Chen et al., 2020	10.1016/j.jclepro.2020.120667	Lab	Single Stage	Sequencing Batch Reactor (SBR)	SBR	2.5	Flocculent Sludge (FS)	FS	Xiamen, China	0.4711	0.012	Partial Nitrification / Anammox (PNA)	PNA	2.2	Synthetic Wastewater	None	0.2	0.0024	0.2	20.5128	20.5128	29.8888	29.8888	1.02564	1.02564	4.16667	4.16667	68.2051	68.2051	61.15	61.15	89.7436	89.7436	0.11	0.55	0.00033	1.28342	NA	3.3e-08	0.01	0.875061	0.481283	NA	NA	1.28342	6.3e-05	NA	NA	0
Chen et al., 2020	10.1016/j.jclepro.2020.120667	Lab	Single Stage	Sequencing Batch Reactor (SBR)	SBR	2.5	Flocculent Sludge (FS)	FS	Xiamen, China	0.4711	0.012	Partial Nitrification / Anammox (PNA)	PNA	2.2	Synthetic Wastewater	None	0.2	0.0024	0.2	17.4359	17.4359	29.8888	29.8888	0.512821	0.512821	4.16667	4.16667	65.641	65.641	61.15	61.15	83.5897	83.5897	0.11	0.55	0.00033	2.24599	NA	3.3e-08	0.01	1.53136	0.842246	NA	NA	2.24599	0.000110294	NA	NA	0
Chen et al., 2020	10.1016/j.jclepro.2020.120667	Lab	Single Stage	Sequencing Batch Reactor (SBR)	SBR	2.5	Flocculent Sludge (FS)	FS	Xiamen, China	0.4711	0.012	Partial Nitrification / Anammox (PNA)	PNA	2.2	Synthetic Wastewater	None	0.2	0.0024	0.2	21.5385	21.5385	29.8888	29.8888	1.02564	1.02564	4.16667	4.16667	63.0769	63.0769	61.15	61.15	85.641	85.641	0.11	0.55	0.00033	1.81818	NA	3.3e-08	0.01	1.23967	0.681818	NA	NA	1.81818	8.93e-05	NA	NA	0
Chen et al., 2020	10.1016/j.jclepro.2020.120667	Lab	Single Stage	Sequencing Batch Reactor (SBR)	SBR	2.5	Flocculent Sludge (FS)	FS	Xiamen, China	0.4711	0.012	Partial Nitrification / Anammox (PNA)	PNA	2.2	Synthetic Wastewater	None	0.2	0.0024	0.2	16.9231	16.9231	29.8888	29.8888	1.02564	1.02564	4.16667	4.16667	59.4872	59.4872	61.15	61.15	77.4359	77.4359	0.11	0.55	0.00033	1.71123	NA	3.3e-08	0.01	1.16675	0.641711	NA	NA	1.71123	8.4e-05	NA	NA	0
Chen et al., 2020	10.1016/j.jclepro.2020.120667	Lab	Single Stage	Sequencing Batch Reactor (SBR)	SBR	2.5	Flocculent Sludge (FS)	FS	Xiamen, China	0.4711	0.012	Partial Nitrification / Anammox (PNA)	PNA	2.2	Synthetic Wastewater	None	0.2	0.0024	0.2	23.5897	23.5897	29.8888	29.8888	0.512821	0.512821	4.16667	4.16667	60.5128	60.5128	61.15	61.15	84.6154	84.6154	0.11	0.55	0.00033	1.06952	NA	3.3e-08	0.01	0.729217	0.40107	NA	NA	1.06952	5.25e-05	NA	NA	0
Chen et al., 2020	10.1016/j.jclepro.2020.120667	Lab	Single Stage	Sequencing Batch Reactor (SBR)	SBR	2.5	Flocculent Sludge (FS)	FS	Xiamen, China	0.4711	0.012	Partial Nitrification / Anammox (PNA)	PNA	2.2	Synthetic Wastewater	None	0.2	0.0024	0.2	23.5897	23.5897	29.8888	29.8888	0.512821	0.512821	4.16667	4.16667	59.4872	59.4872	61.15	61.15	83.5897	83.5897	0.11	0.55	0.00033	1.60428	NA	3.3e-08	0.01	1.09383	0.601604	NA	NA	1.60428	7.88e-05	NA	NA	0
Chen et al., 2020	10.1016/j.jclepro.2020.120667	Lab	Single Stage	Sequencing Batch Reactor (SBR)	SBR	2.5	Flocculent Sludge (FS)	FS	Xiamen, China	0.4711	0.012	Partial Nitrification / Anammox (PNA)	PNA	2.2	Synthetic Wastewater	None	0.2	0.0024	0.2	45.4545	45.4545	46.2258	46.2258	1.51515	1.51515	4.85197	4.85197	33.3333	33.3333	43.79	43.79	80.303	80.303	0.13	0.65	0.00039	20.7487	NA	6.63e-07	0.17	16.7585	10.893	NA	NA	20.7487	0.00142647	NA	NA	0
Chen et al., 2020	10.1016/j.jclepro.2020.120667	Lab	Single Stage	Sequencing Batch Reactor (SBR)	SBR	2.5	Flocculent Sludge (FS)	FS	Xiamen, China	0.4711	0.012	Partial Nitrification / Anammox (PNA)	PNA	2.2	Synthetic Wastewater	None	0.2	0.0024	0.2	38.3838	38.3838	46.2258	46.2258	1.51515	1.51515	4.85197	4.85197	59.0909	59.0909	43.79	43.79	98.9899	98.9899	0.13	0.65	0.00039	43.5294	NA	6.63e-07	0.17	35.1584	22.8529	NA	NA	43.5294	0.00299265	NA	NA	0
Chen et al., 2020	10.1016/j.jclepro.2020.120667	Lab	Single Stage	Sequencing Batch Reactor (SBR)	SBR	2.5	Flocculent Sludge (FS)	FS	Xiamen, China	0.4711	0.012	Partial Nitrification / Anammox (PNA)	PNA	2.2	Synthetic Wastewater	None	0.2	0.0024	0.2	38.3838	38.3838	46.2258	46.2258	0.505051	0.505051	4.85197	4.85197	55.0505	55.0505	43.79	43.79	93.9394	93.9394	0.13	0.65	0.00039	60.6417	NA	6.63e-07	0.17	48.9798	31.8369	NA	NA	60.6417	0.00416912	NA	NA	0
Chen et al., 2020	10.1016/j.jclepro.2020.120667	Lab	Single Stage	Sequencing Batch Reactor (SBR)	SBR	2.5	Flocculent Sludge (FS)	FS	Xiamen, China	0.4711	0.012	Partial Nitrification / Anammox (PNA)	PNA	2.2	Synthetic Wastewater	None	0.2	0.0024	0.2	38.3838	38.3838	46.2258	46.2258	0	0	4.85197	4.85197	51.0101	51.0101	43.79	43.79	89.3939	89.3939	0.13	0.65	0.00039	53.262	NA	6.63e-07	0.17	43.0193	27.9626	NA	NA	53.262	0.00366176	NA	NA	0
Chen et al., 2020	10.1016/j.jclepro.2020.120667	Lab	Single Stage	Sequencing Batch Reactor (SBR)	SBR	2.5	Flocculent Sludge (FS)	FS	Xiamen, China	0.4711	0.012	Partial Nitrification / Anammox (PNA)	PNA	2.2	Synthetic Wastewater	None	0.2	0.0024	0.2	40.404	40.404	46.2258	46.2258	0.505051	0.505051	4.85197	4.85197	48.4848	48.4848	43.79	43.79	89.3939	89.3939	0.13	0.65	0.00039	54.1176	NA	6.63e-07	0.17	43.7104	28.4118	NA	NA	54.1176	0.00372059	NA	NA	0
Chen et al., 2020	10.1016/j.jclepro.2020.120667	Lab	Single Stage	Sequencing Batch Reactor (SBR)	SBR	2.5	Flocculent Sludge (FS)	FS	Xiamen, China	0.4711	0.012	Partial Nitrification / Anammox (PNA)	PNA	2.2	Synthetic Wastewater	None	0.2	0.0024	0.2	42.4242	42.4242	46.2258	46.2258	0	0	4.85197	4.85197	44.4444	44.4444	43.79	43.79	86.8687	86.8687	0.13	0.65	0.00039	52.9412	NA	6.63e-07	0.17	42.7602	27.7941	NA	NA	52.9412	0.00363971	NA	NA	0
Chen et al., 2020	10.1016/j.jclepro.2020.120667	Lab	Single Stage	Sequencing Batch Reactor (SBR)	SBR	2.5	Flocculent Sludge (FS)	FS	Xiamen, China	0.4711	0.012	Partial Nitrification / Anammox (PNA)	PNA	2.2	Synthetic Wastewater	None	0.2	0.0024	0.2	42.4242	42.4242	46.2258	46.2258	0.505051	0.505051	4.85197	4.85197	41.4141	41.4141	43.79	43.79	84.3434	84.3434	0.13	0.65	0.00039	51.4439	NA	6.63e-07	0.17	41.5508	27.008	NA	NA	51.4439	0.00353676	NA	NA	0
Chen et al., 2020	10.1016/j.jclepro.2020.120667	Lab	Single Stage	Sequencing Batch Reactor (SBR)	SBR	2.5	Flocculent Sludge (FS)	FS	Xiamen, China	0.4711	0.012	Partial Nitrification / Anammox (PNA)	PNA	2.2	Synthetic Wastewater	None	0.2	0.0024	0.2	42.9293	42.9293	46.2258	46.2258	0	0	4.85197	4.85197	37.3737	37.3737	43.79	43.79	80.303	80.303	0.13	0.65	0.00039	39.6791	NA	6.63e-07	0.17	32.0485	20.8316	NA	NA	39.6791	0.00272794	NA	NA	0
Chen et al., 2020	10.1016/j.jclepro.2020.120667	Lab	Single Stage	Sequencing Batch Reactor (SBR)	SBR	2.5	Flocculent Sludge (FS)	FS	Xiamen, China	0.4711	0.012	Partial Nitrification / Anammox (PNA)	PNA	2.2	Synthetic Wastewater	None	0.2	0.0024	0.2	43.9394	43.9394	46.2258	46.2258	0.505051	0.505051	4.85197	4.85197	32.8283	32.8283	43.79	43.79	77.2727	77.2727	0.13	0.65	0.00039	31.9786	NA	6.63e-07	0.17	25.8289	16.7888	NA	NA	31.9786	0.00219853	NA	NA	0
Chen et al., 2020	10.1016/j.jclepro.2020.120667	Lab	Single Stage	Sequencing Batch Reactor (SBR)	SBR	2.5	Flocculent Sludge (FS)	FS	Xiamen, China	0.4711	0.012	Partial Nitrification / Anammox (PNA)	PNA	2.2	Synthetic Wastewater	None	0.2	0.0024	0.2	44.9495	44.9495	46.2258	46.2258	1.51515	1.51515	4.85197	4.85197	25.2525	25.2525	43.79	43.79	71.7172	71.7172	0.13	0.65	0.00039	9.83957	NA	6.63e-07	0.17	7.94735	5.16578	NA	NA	9.83957	0.000676471	NA	NA	0
Hu et al., 2013	10.1128/AEM.03987-12	Lab	Single Stage	Sequencing Batch Reactor (SBR)	SBR	2.5	Flocculent Sludge (FS)	FS	Nijmegen, The Netherlands	0.442	0.005	Partial Nitrification / Anammox (PNA)	PNA	2.2	Synthetic Wastewater	None	84.48 mgN/L/d	0.4224	0.08448	0	0	0	0	0	0	0	0	84.48 mgN/L/d	54.3086	5.26 mgN/L/d	3.38143	84.48 mgN/L/d	42.24	79.22	0.9377	3.961e-05	2.4% NR	9.51e-07	9.51e-07	2.4	2.4	2.25057	NA	NA	1.5844e-05	1.5844e-05	NA	NA	0
Yan et al., 2016	10.1039/c6ra24109c	Lab	Single Stage	Sequencing Batch Reactor (SBR)	SBR	2.5	Flocculent Sludge (FS)	FS	Shanghai, China	0.5834	0.002	Partial Nitrification / Anammox (PNA)	PNA	2.2	Synthetic Wastewater	Intermittent Aeration	0.19 kgN m-3 d-1	0.00038	0.19	0	0	28.6269	28.6269	0	0	2.75821	2.75821	99.9224	99.9224	31.1761	31.1761	77.7174	77.7174	46.1657	0.406	9.23e-05	0.6% of removed N	NA	1.74e-06	0.6	0.6	0.43	NA	NA	5.44e-05	5.44e-05	NA	NA	0
Yan et al., 2016	10.1039/c6ra24109c	Lab	Single Stage	Sequencing Batch Reactor (SBR)	SBR	2.5	Flocculent Sludge (FS)	FS	Shanghai, China	0.5834	0.002	Partial Nitrification / Anammox (PNA)	PNA	2.2	Synthetic Wastewater	Intermittent Aeration	0.18	0.00036	0.18	0	0	26.8553	26.8553	0	0	7.40841	7.40841	100.776	100.776	32.3582	32.3582	78.3814	78.3814	44.8951	0.4272	8.98e-05	0.0096	NA	2.71e-06	0.96	0.96	0.75	NA	NA	8.47e-05	8.47e-05	NA	NA	0
Yan et al., 2016	10.1039/c6ra24109c	Lab	Single Stage	Sequencing Batch Reactor (SBR)	SBR	2.5	Flocculent Sludge (FS)	FS	Shanghai, China	0.5834	0.002	Partial Nitrification / Anammox (PNA)	PNA	2.2	Synthetic Wastewater	Intermittent Aeration	0.22	0.00044	0.22	0	0	28.8637	28.8637	0	0	1.55224	1.55224	103.976	103.976	24.6045	24.6045	80.8703	80.8703	54.7435	0.3231	0.000109487	0.0088	NA	3.03e-06	0.88	0.88	0.52	NA	NA	9.46e-05	9.46e-05	NA	NA	0
Yan et al., 2016	10.1039/c6ra24109c	Lab	Single Stage	Sequencing Batch Reactor (SBR)	SBR	2.5	Flocculent Sludge (FS)	FS	Shanghai, China	0.5834	0.002	Partial Nitrification / Anammox (PNA)	PNA	2.2	Synthetic Wastewater	Intermittent Aeration	0.18	0.00036	0.18	0	0	23.0815	23.0815	0	0	1.46269	1.46269	117.294	117.294	49.442	49.442	91.2283	91.2283	47.1163	0.4835	9.42e-05	0.0041	NA	1.21e-06	0.41	0.41	0.23	NA	NA	3.79e-05	3.79e-05	NA	NA	0
Yan et al., 2016	10.1039/c6ra24109c	Lab	Single Stage	Sequencing Batch Reactor (SBR)	SBR	2.5	Flocculent Sludge (FS)	FS	Shanghai, China	0.5834	0.002	Partial Nitrification / Anammox (PNA)	PNA	2.2	Synthetic Wastewater	Intermittent Aeration	0.15	0.0003	0.15	0	0	26.997	26.997	0	0	1.4859	1.4859	130.388	130.388	75.1403	75.1403	101.413	101.413	36.4221	0.6409	7.28e-05	0.0037	NA	8.47e-07	0.37	0.37	0.16	NA	NA	2.65e-05	2.65e-05	NA	NA	0
Yan et al., 2016	10.1039/c6ra24109c	Lab	Aerated	Sequencing Batch Reactor (SBR)	SBR	2.5	Flocculent Sludge (FS)	FS	Shanghai, China	0.5834	0.002	Partial Nitrification (PN)	PN	3.43	Synthetic Wastewater	Intermittent Aeration	0.19 kgN m-3 d-1	0.00038	0.19	0	0	28.6269	28.6269	0	0	2.75821	2.75821	99.9224	99.9224	31.1761	31.1761	77.7174	77.7174	46.1657	0.406	9.23e-05	0.32	NA	1.74e-06	0.32	0.32	0.129913	NA	NA	5.44e-05	5.44e-05	NA	NA	0
Yan et al., 2016	10.1039/c6ra24109c	Lab	Aerated	Sequencing Batch Reactor (SBR)	SBR	2.5	Flocculent Sludge (FS)	FS	Shanghai, China	0.5834	0.002	Partial Nitrification (PN)	PN	3.43	Synthetic Wastewater	Intermittent Aeration	0.18	0.00036	0.18	0	0	26.8553	26.8553	0	0	7.40841	7.40841	100.776	100.776	32.3582	32.3582	78.3814	78.3814	44.8951	0.4272	8.98e-05	0.45	NA	0.000126989	0.45	0.45	0.19225	NA	NA	0.00396841	0.00396841	NA	NA	0
Yan et al., 2016	10.1039/c6ra24109c	Lab	Aerated	Sequencing Batch Reactor (SBR)	SBR	2.5	Flocculent Sludge (FS)	FS	Shanghai, China	0.5834	0.002	Partial Nitrification (PN)	PN	3.43	Synthetic Wastewater	Intermittent Aeration	0.22	0.00044	0.22	0	0	28.8637	28.8637	0	0	1.55224	1.55224	103.976	103.976	24.6045	24.6045	80.8703	80.8703	54.7435	0.3231	0.000109487	0.36	NA	0.000123877	0.36	0.36	0.116306	NA	NA	0.00387115	0.00387115	NA	NA	0
Yan et al., 2016	10.1039/c6ra24109c	Lab	Aerated	Sequencing Batch Reactor (SBR)	SBR	2.5	Flocculent Sludge (FS)	FS	Shanghai, China	0.5834	0.002	Partial Nitrification (PN)	PN	3.43	Synthetic Wastewater	Intermittent Aeration	0.18	0.00036	0.18	0	0	23.0815	23.0815	0	0	1.46269	1.46269	117.294	117.294	49.442	49.442	91.2283	91.2283	47.1163	0.4835	9.42e-05	0.15	NA	4.44e-05	0.15	0.15	0.0725302	NA	NA	0.00138825	0.00138825	NA	NA	0
Yan et al., 2016	10.1039/c6ra24109c	Lab	Aerated	Sequencing Batch Reactor (SBR)	SBR	2.5	Flocculent Sludge (FS)	FS	Shanghai, China	0.5834	0.002	Partial Nitrification (PN)	PN	3.43	Synthetic Wastewater	Intermittent Aeration	0.15	0.0003	0.15	0	0	26.997	26.997	0	0	1.4859	1.4859	130.388	130.388	75.1403	75.1403	101.413	101.413	36.4221	0.6409	7.28e-05	0.11	NA	2.52e-05	0.11	0.11	0.0704938	NA	NA	0.000786979	0.000786979	NA	NA	0
Yan et al., 2016	10.1039/c6ra24109c	Lab	Non-aerated	Sequencing Batch Reactor (SBR)	SBR	2.5	Flocculent Sludge (FS)	FS	Shanghai, China	0.5834	0.002	Anammox (AMX)	AMX	0	Synthetic Wastewater	Intermittent Aeration	0.19 kgN m-3 d-1	0.00038	0.19	0	0	28.6269	28.6269	0	0	2.75821	2.75821	99.9224	99.9224	31.1761	31.1761	77.7174	77.7174	46.1657	0.406	9.23e-05	0.11	NA	1.74e-06	0.11	0.11	0.0446577	NA	NA	5.44e-05	5.44e-05	NA	NA	0
Yan et al., 2016	10.1039/c6ra24109c	Lab	Non-aerated	Sequencing Batch Reactor (SBR)	SBR	2.5	Flocculent Sludge (FS)	FS	Shanghai, China	0.5834	0.002	Anammox (AMX)	AMX	0	Synthetic Wastewater	Intermittent Aeration	0.18	0.00036	0.18	0	0	26.8553	26.8553	0	0	7.40841	7.40841	100.776	100.776	32.3582	32.3582	78.3814	78.3814	44.8951	0.4272	8.98e-05	0.3	NA	8.47e-05	0.3	0.3	0.128167	NA	NA	0.0026456	0.0026456	NA	NA	0
Yan et al., 2016	10.1039/c6ra24109c	Lab	Non-aerated	Sequencing Batch Reactor (SBR)	SBR	2.5	Flocculent Sludge (FS)	FS	Shanghai, China	0.5834	0.002	Anammox (AMX)	AMX	0	Synthetic Wastewater	Intermittent Aeration	0.22	0.00044	0.22	0	0	28.8637	28.8637	0	0	1.55224	1.55224	103.976	103.976	24.6045	24.6045	80.8703	80.8703	54.7435	0.3231	0.000109487	0.16	NA	5.51e-05	0.16	0.16	0.0516913	NA	NA	0.00172051	0.00172051	NA	NA	0
Yan et al., 2016	10.1039/c6ra24109c	Lab	Non-aerated	Sequencing Batch Reactor (SBR)	SBR	2.5	Flocculent Sludge (FS)	FS	Shanghai, China	0.5834	0.002	Anammox (AMX)	AMX	0	Synthetic Wastewater	Intermittent Aeration	0.18	0.00036	0.18	0	0	23.0815	23.0815	0	0	1.46269	1.46269	117.294	117.294	49.442	49.442	91.2283	91.2283	47.1163	0.4835	9.42e-05	0.07	NA	2.07e-05	0.07	0.07	0.0338474	NA	NA	0.000647849	0.000647849	NA	NA	0
Yan et al., 2016	10.1039/c6ra24109c	Lab	Non-aerated	Sequencing Batch Reactor (SBR)	SBR	2.5	Flocculent Sludge (FS)	FS	Shanghai, China	0.5834	0.002	Anammox (AMX)	AMX	0	Synthetic Wastewater	Intermittent Aeration	0.15	0.0003	0.15	0	0	26.997	26.997	0	0	1.4859	1.4859	130.388	130.388	75.1403	75.1403	101.413	101.413	36.4221	0.6409	7.28e-05	0.05	NA	1.14e-05	0.05	0.05	0.0320427	NA	NA	0.000357718	0.000357718	NA	NA	0
Domingo-FelÃÅez et al., 2014	10.1021/es501819n	Lab	Single Stage	Sequencing Batch Reactor (SBR)	SBR	2.5	Flocculent Sludge (FS)	FS	Lyngby, Denmark	0.373	0.004	Partial Nitrification / Anammox (PNA)	PNA	2.2	Synthetic Wastewater	Intermittent Aeration	0.75 gNH4+-N/L¬∑d	0.003	0.75	0	0	NA	NA	0	0	NA	NA	0.75 gNH4-N/L/d	642.857	NA	NA	0.75 gNH4-N/L/d	0.5	674 mgN L-1 d-1	0.8987	0.00179733	0.061	NA	0.000344574	6.1	6.1	5.48187	NA	NA	0.66742857 mgN2O-N/gVSS/h	5.66e-06	NA	NA	0
Domingo-FelÃÅez et al., 2014	10.1021/es501819n	Lab	Single Stage	Sequencing Batch Reactor (SBR)	SBR	2.5	Flocculent Sludge (FS)	FS	Lyngby, Denmark	0.373	0.004	Partial Nitrification / Anammox (PNA)	PNA	2.2	Synthetic Wastewater	Intermittent Aeration	0.75	0.003	0.75	0	0	34.2	151.457	0	0	0.168	0.552	0.75 gNH4-N/L/d	642.857	88.8	114.171	0.75 gNH4-N/L/d	0.5	638	0.8507	0.00170133	0.07	NA	0.000374293	6.5	6.5	5.52933	NA	NA	0.608	5.16e-06	NA	NA	0
Domingo-FelÃÅez et al., 2014	10.1021/es501819n	Lab	Single Stage	Sequencing Batch Reactor (SBR)	SBR	2.5	Flocculent Sludge (FS)	FS	Lyngby, Denmark	0.373	0.004	Partial Nitrification / Anammox (PNA)	PNA	2.2	Synthetic Wastewater	Intermittent Aeration	0.75	0.003	0.75	0	0	NA	NA	0	0	NA	NA	0.75 gNH4-N/L/d	642.857	NA	NA	0.75 gNH4-N/L/d	0.5	632	0.8427	0.00168533	0.065	NA	0.00034429	6.5	6.5	5.47733	NA	NA	0.56	4.752e-06	NA	NA	0
Domingo-FelÃÅez et al., 2014	10.1021/es501819n	Lab	Single Stage	Sequencing Batch Reactor (SBR)	SBR	2.5	Flocculent Sludge (FS)	FS	Lyngby, Denmark	0.373	0.004	Partial Nitrification / Anammox (PNA)	PNA	2.2	Synthetic Wastewater	Intermittent Aeration	0.75	0.003	0.75	0	0	NA	NA	0	0	NA	NA	0.75 gNH4-N/L/d	642.857	NA	NA	0.75 gNH4-N/L/d	0.5	592	0.7893	0.00157867	0.029	NA	0.000143884	2.9	2.9	2.28907	NA	NA	0.242286	2.06e-06	NA	NA	0
Domingo-FelÃÅez et al., 2014	10.1021/es501819n	Lab	Single Stage	Sequencing Batch Reactor (SBR)	SBR	2.5	Flocculent Sludge (FS)	FS	Lyngby, Denmark	0.373	0.004	Partial Nitrification / Anammox (PNA)	PNA	2.2	Synthetic Wastewater	Intermittent Aeration	0.75	0.003	0.75	0	0	NA	NA	0	0	NA	NA	0.75 gNH4-N/L/d	642.857	NA	NA	0.75 gNH4-N/L/d	0.5	641	0.8547	0.00170933	0.017	NA	9.13e-05	1.7	1.7	1.45293	NA	NA	0.150857	1.28e-06	NA	NA	0
Domingo-FelÃÅez et al., 2014	10.1021/es501819n	Lab	Single Stage	Sequencing Batch Reactor (SBR)	SBR	2.5	Flocculent Sludge (FS)	FS	Lyngby, Denmark	0.373	0.004	Partial Nitrification / Anammox (PNA)	PNA	2.2	Synthetic Wastewater	Intermittent Aeration	0.75	0.003	0.75	0	0	NA	NA	0	0	NA	NA	0.75 gNH4-N/L/d	642.857	NA	NA	0.75 gNH4-N/L/d	0.5	669	0.892	0.001784	0.103	NA	0.000577506	10.3	10.3	9.1876	NA	NA	1.23832	1.09e-05	NA	NA	0
Domingo-FelÃÅez et al., 2014	10.1021/es501819n	Lab	Single Stage	Sequencing Batch Reactor (SBR)	SBR	2.5	Flocculent Sludge (FS)	FS	Lyngby, Denmark	0.373	0.004	Partial Nitrification / Anammox (PNA)	PNA	2.2	Synthetic Wastewater	Intermittent Aeration	0.75	0.003	0.75	0	0	44.88	147.463	0	0	0.389	1.72271	0.75 gNH4-N/L/d	642.857	22.13	28.4529	0.75 gNH4-N/L/d	0.5	678	0.904	0.001808	0.139	NA	0.000789838	13.9	13.9	12.5656	NA	NA	1.55607	1.37e-05	NA	NA	0
Domingo-FelÃÅez et al., 2014	10.1021/es501819n	Lab	Single Stage	Sequencing Batch Reactor (SBR)	SBR	2.5	Flocculent Sludge (FS)	FS	Lyngby, Denmark	0.373	0.004	Partial Nitrification / Anammox (PNA)	PNA	2.2	Synthetic Wastewater	Intermittent Aeration	0.75	0.003	0.75	0	0	NA	NA	0	0	NA	NA	0.75 gNH4-N/L/d	642.857	NA	NA	0.75 gNH4-N/L/d	0.5	641	0.8547	0.00170933	0.126	NA	0.000676896	12.6	12.6	10.7688	NA	NA	1.21495	1.07e-05	NA	NA	0
Domingo-FelÃÅez et al., 2014	10.1021/es501819n	Lab	Single Stage	Sequencing Batch Reactor (SBR)	SBR	2.5	Flocculent Sludge (FS)	FS	Lyngby, Denmark	0.373	0.004	Partial Nitrification / Anammox (PNA)	PNA	2.2	Synthetic Wastewater	Intermittent Aeration	0.75	0.003	0.75	0	0	NA	NA	0	0	NA	NA	0.75 gNH4-N/L/d	642.857	NA	NA	0.75 gNH4-N/L/d	0.5	693	0.924	0.001848	0.106	NA	0.000615648	10.6	10.6	9.7944	NA	NA	0.78972	6.95e-06	NA	NA	0
Domingo-FelÃÅez et al., 2014	10.1021/es501819n	Lab	Single Stage	Sequencing Batch Reactor (SBR)	SBR	2.5	Flocculent Sludge (FS)	FS	Lyngby, Denmark	0.373	0.004	Partial Nitrification / Anammox (PNA)	PNA	2.2	Synthetic Wastewater	Intermittent Aeration	0.75	0.003	0.75	0	0	NA	NA	0	0	NA	NA	0.75 gNH4-N/L/d	642.857	NA	NA	0.75 gNH4-N/L/d	0.5	632	0.8427	0.00168533	0.086	NA	0.000455522	8.6	8.6	7.24693	NA	NA	0.836449	7.36e-06	NA	NA	0
Cao et al., 2019	10.1016/j.cej.2018.12.160	Lab	Single Stage	Sequencing Batch Reactor (SBR)	SBR	2.5	Flocculent Sludge (FS)	FS	Rennes, France	0.048	0.0055	Partial Denitrification / Anammox (PdNA)	PdNA	2.96	Anaerobic Digester Supernatant	None	0.83 gN/L/d	0.004565	0.83	2	8.85714	56	248	476	1564	50	164.286	458	588.857	88	113.143	936	936	0.31 gN/L/d	0.3735	0.00432795	1.1 % Nloaded	NA	6.48e-05	0.0149672	2.94516	1.1	NA	NA	0.000380417	0.000380417	68.391	NA	510
Cao et al., 2019	10.1016/j.cej.2018.12.160	Lab	Single Stage	Sequencing Batch Reactor (SBR)	SBR	2.5	Flocculent Sludge (FS)	FS	Rennes, France	0.048	0.0058	Partial Denitrification / Anammox (PdNA)	PdNA	2.96	Anaerobic Digester Supernatant	None	0.69	0.00418	0.72069	2	8.85714	35	155	246	808.286	3	9.85714	243	312.429	45	57.8571	491	491	0.31	0.4493	0.0016709	0.008	NA	3.28e-05	0.0196129	1.78065	0.8	NA	NA	0.00024023	0.00024023	68.391	NA	510
Cao et al., 2019	10.1016/j.cej.2018.12.160	Lab	Single Stage	Sequencing Batch Reactor (SBR)	SBR	2.5	Flocculent Sludge (FS)	FS	Rennes, France	0.048	0.0057	Partial Denitrification / Anammox (PdNA)	PdNA	2.96	Anaerobic Digester Supernatant	None	0.75	0.004408	0.773333	2	8.85714	31	137.286	296	972.571	22	72.2857	317	407.571	116	149.143	615	615	0.23	0.3067	0.00137402	0.021	NA	9.53e-05	0.0693913	6.84783	2.1	NA	NA	0.000676667	0.000676667	68.391	NA	510
Cao et al., 2019	10.1016/j.cej.2018.12.160	Lab	Single Stage	Sequencing Batch Reactor (SBR)	SBR	2.5	Flocculent Sludge (FS)	FS	Rennes, France	0.048	0.0026	Partial Denitrification / Anammox (PdNA)	PdNA	2.96	Anaerobic Digester Supernatant	None	0.33	0.004332	1.66615	1	4.42857	26	115.143	1	3.28571	17	55.8571	459	590.143	47	60.4286	461	461	0.27	0.8182	0.00226233	0.004	NA	2.55e-05	0.0112593	0.488889	0.4	NA	NA	0.000277692	0.000277692	59.2296	NA	410
Cao et al., 2019	10.1016/j.cej.2018.12.160	Lab	Single Stage	Sequencing Batch Reactor (SBR)	SBR	2.5	Flocculent Sludge (FS)	FS	Rennes, France	0.048	0.0026	Partial Denitrification / Anammox (PdNA)	PdNA	2.96	Anaerobic Digester Supernatant	None	0.67	0.001976	0.76	2	8.85714	60	265.714	1	3.28571	23	75.5714	911	1171.29	142	182.571	914	914	0.5	0.7463	0.001781	0.008	NA	2.17e-05	0.01216	1.072	0.8	NA	NA	0.000253333	0.000253333	59.2296	NA	410
Cao et al., 2019	10.1016/j.cej.2018.12.160	Lab	Single Stage	Sequencing Batch Reactor (SBR)	SBR	2.5	Flocculent Sludge (FS)	FS	Rennes, France	0.048	0.0029	Partial Denitrification / Anammox (PdNA)	PdNA	2.96	Anaerobic Digester Supernatant	None	0.42	0.001976	0.681379	2	8.85714	25	110.714	1	3.28571	18	59.1429	442	568.286	118	151.714	445	445	0.27	0.6429	0.00075816	0.012	NA	2.56e-05	0.0337778	1.86667	1.2	NA	NA	0.00034069	0.00034069	59.2296	NA	410
Cao et al., 2019	10.1016/j.cej.2018.12.160	Lab	Single Stage	Sequencing Batch Reactor (SBR)	SBR	2.5	Flocculent Sludge (FS)	FS	Rennes, France	0.048	0.0026	Partial Denitrification / Anammox (PdNA)	PdNA	2.96	Anaerobic Digester Supernatant	None	0.34	0.002204	0.847692	2	8.85714	21	93	3	9.85714	26	85.4286	461	592.714	86	110.571	466	466	0.24	0.7059	0.0010788	0.046	NA	0.000157145	0.145667	6.51667	4.6	NA	NA	0.00162474	0.00162474	59.2296	NA	410
Staunton et al., 2015	10.1089/ees.2015.0063	Lab	Single Stage	Sequencing Batch Reactor (SBR)	SBR	2.5	Flocculent Sludge (FS)	FS	North Carolina, US	0.362679	0.00687883	Partial Nitrification / Anammox (PNA)	PNA	2.2	Digestate	None	67 gm-3d-1	0.000460881	0.067	0	0	24.5	24.5	0	0	27.3	27.3	2080	2080	98	98	67.0 g/m3/d	2610	90% removal	0.9	0.0161584	11.4% removed TN	0.00184205	0.00184205	11.4	11.4	10.26	NA	NA	0.00557887	0.00557887	496	119.4	60.1 g/m3/d
Zhou et al., 2018	10.1016/j.biortech.2018.01.131	Lab	Single Stage	Sequencing Batch Reactor (SBR)	SBR	2.5	Flocculent Sludge (FS)	FS	Beijing, China	0.5688	0.022	Partial Nitrification / Anammox (PNA)	PNA	2.2	Domestic Wastewater	None	0.951986	0.951986	43.2721	0.782123	3.46369	0	0	0.391061	1.28492	20.7263	68.1006	43.7989	56.3128	11.3408	14.581	44.9721	44.9721	0.3886	0.3886	0.000384475	0.06	3.63e-05	3.63e-05	6	6	2.3316	NA	NA	6.61e-05	6.61e-05	NA	NA	103.613
Zhou et al., 2018	10.1016/j.biortech.2018.01.131	Lab	Single Stage	Sequencing Batch Reactor (SBR)	SBR	2.5	Flocculent Sludge (FS)	FS	Beijing, China	0.5688	0.022	Nitrification / Anammox (NiA)	NiA	2.96	Domestic Wastewater	None	0.546357	0.546357	24.8344	0.391061	1.73184	21.1173	93.5196	0.391061	1.28492	0.391061	1.28492	25.0279	32.1788	4.30168	5.53073	25.8101	25.8101	0.0082	0.0082	4.66e-06	0	0	0	0	0	0	NA	NA	0	0	NA	NA	69.3277
Zhou et al., 2018	10.1016/j.biortech.2018.01.131	Lab	Single Stage	Sequencing Batch Reactor (SBR)	SBR	2.5	Flocculent Sludge (FS)	FS	Beijing, China	0.5688	0.022	Nitrification / Anammox (NiA)	NiA	2.96	Domestic Wastewater	None	0.951986	0.951986	43.2721	0.391061	1.73184	31.676	140.279	0.782123	2.56983	0	0	43.7989	56.3128	1.95531	2.51397	44.9721	44.9721	0.2163	0.2163	0.000214004	0.029	9.75e-06	9.75e-06	2.9	2.9	0.62727	NA	NA	1.78e-05	1.78e-05	NA	NA	90.5042
Wang et al., 2021	10.1016/j.biortech.2021.125762	Lab	Single Stage	Sequencing Batch Reactor (SBR)	SBR	2.5	Flocculent Sludge (FS)	FS	Shenzhen, China	0.4715	0.0024	Partial Nitrification / Anammox (PNA)	PNA	2.2	Synthetic Wastewater	Intermittent Aeration	0.78	0.001872	0.78	42.0635	186.281	69.0476	305.782	3.1746	10.4308	0	0	244.444	314.286	20.6349	26.5306	289.683	289.683	0.76	0.76	1.824e-06	0.1919	0.0138168	4.34e-05	1.15	1.15	0.874	NA	NA	0.0180935	0.0180935	NA	NA	0
Wang et al., 2021	10.1016/j.biortech.2021.125762	Lab	Single Stage	Sequencing Batch Reactor (SBR)	SBR	2.5	Flocculent Sludge (FS)	FS	Shenzhen, China	0.4715	0.0024	Partial Nitrification / Anammox (PNA)	PNA	2.2	Reject Water	Intermittent Aeration	0.75	0.0018	0.75	20.4657	90.6338	75.3274	333.593	1.69348	5.56428	0.22652	0.29124	235.159	302.348	9.20598	11.8363	257.319	257.319	0.81	0.81	1.944e-06	0.11761	0.00846792	2.66e-05	0.95	0.95	0.7695	NA	NA	0.0110889	0.0110889	NA	NA	468.832
Duan et al., 2019	10.1021/acs.est.8b06148	Lab	Single Stage	Sequencing Batch Reactor (SBR)	SBR	2.5	Flocculent Sludge (FS)	FS	Queensland, Australia	0.81	0.008	Partial Nitrification / Anammox (PNA)	PNA	2.2	Synthetic Wastewater	None	0.0004	0.0004	0.05	16.36	72.4514	15.3	67.7571	0	0	0	0	0	0	0.1	0.128571	69.2% removal	50	eff: 15.4 mgN/L	0.692	0.0002768	4.74e-06	4.74e-06	4.74e-06	1.18590998 %loading	1.71374	1.18591	NA	NA	0.000118591	0.000118591	NA	NA	300
Duan et al., 2019	10.1021/acs.est.8b06148	Lab	Single Stage	Sequencing Batch Reactor (SBR)	SBR	2.5	Flocculent Sludge (FS)	FS	Queensland, Australia	0.81	0.008	Partial Nitrification / Anammox (PNA)	PNA	2.2	Synthetic Wastewater	None	0.000401569	0.000401569	0.0501961	1.06	4.69429	9	39.8571	8.45	27.7643	3.6	11.8286	0	0	0.2	0.257143	0.745	50.1961	12.8	0.745	0.000299169	1.34e-05	1.34e-05	1.34e-05	3.33464	4.47602	3.33464	NA	NA	0.000334771	0.000334771	NA	NA	300
Duan et al., 2019	10.1021/acs.est.8b06148	Lab	Single Stage	Sequencing Batch Reactor (SBR)	SBR	2.5	Flocculent Sludge (FS)	FS	Queensland, Australia	0.81	0.008	Partial Nitrification / Anammox (PNA)	PNA	2.2	Synthetic Wastewater	None	0.0004	0.0004	0.05	1.06	4.69429	1.1	4.87143	10.77	35.3871	10.8	35.4857	0	0	0.1	0.128571	0.76	50	12	0.76	0.000304	8.36e-06	8.36e-06	8.36e-06	2.09002	2.75003	2.09002	NA	NA	0.000209002	0.000209002	NA	NA	300
Duan et al., 2019	10.1021/acs.est.8b06148	Lab	Single Stage	Sequencing Batch Reactor (SBR)	SBR	2.5	Flocculent Sludge (FS)	FS	Queensland, Australia	0.81	0.008	Partial Nitrification / Anammox (PNA)	PNA	2.2	Synthetic Wastewater	None	0.0004	0.0004	0.05	8.36	37.0229	6.5	28.7857	3.38	11.1057	6.2	20.3714	0	0	0.1	0.128571	0.744	50	12.8	0.744	0.0002976	4.88e-06	4.88e-06	4.88e-06	1.22114	1.64131	1.22114	NA	NA	0.000122114	0.000122114	NA	NA	300
Duan et al., 2019	10.1021/acs.est.8b06148	Lab	Single Stage	Sequencing Batch Reactor (SBR)	SBR	2.5	Flocculent Sludge (FS)	FS	Queensland, Australia	0.81	0.008	Partial Nitrification / Anammox (PNA)	PNA	2.2	Synthetic Wastewater	None	0.0004	0.0004	0.05	0.31	1.37286	0.6	2.65714	9.4	30.8857	9.7	31.8714	0	0	0.2	0.257143	0.79	50	10.5	0.79	0.000316	6.9e-06	6.9e-06	6.9e-06	1.72603	2.18484	1.72603	NA	NA	0.000172603	0.000172603	NA	NA	300
Duan et al., 2019	10.1021/acs.est.8b06148	Lab	Single Stage	Sequencing Batch Reactor (SBR)	SBR	2.5	Flocculent Sludge (FS)	FS	Queensland, Australia	0.81	0.008	Partial Nitrification / Anammox (PNA)	PNA	2.2	Synthetic Wastewater	None	0.000401646	0.000401646	0.0502058	0	0	0.5	2.21429	10.99	36.11	11.4	37.4571	0.53	0.681429	0.2	0.257143	0.757	50.2058	12.2	0.757	0.000304046	6.23e-06	6.23e-06	6.23e-06	1.5499	2.04743	1.5499	NA	NA	0.000155628	0.000155628	NA	NA	300
Harris et al., 2015	10.1016/j.watres.2015.06.040	Pilot	Single Stage	Sequencing Batch Reactor (SBR)	SBR	2.5	Flocculent Sludge (FS)	FS	DuÃàbendorf, Switzerland	0.16	0.4	Partial Nitrification / Anammox (PNA)	PNA	2.2	Domestic Wastewater	Intermittent Feeding	0.205247	0.205247	0.513117	46.1538	204.396	5.12820513 % NO3/NH4 removed	131.163	1.15384615 mgN/L/h	124.669	1.15385	3.79121	333.301	428.53	9.7983871 removal rate mgN/L/h	10.3252	417.397	705.402	38.8021	0.945	0.26664	0.000897745	0.000897745	0.000897745	0.69105691 % removed NH4	0.819764	0.260718	NA	NA	6.8e-05	6.8e-05	NA	NA	300
Harris et al., 2015	10.1016/j.watres.2015.06.040	Pilot	Single Stage	Sequencing Batch Reactor (SBR)	SBR	2.5	Flocculent Sludge (FS)	FS	DuÃàbendorf, Switzerland	0.16	0.4	Partial Nitrification / Anammox (PNA)	PNA	2.2	Domestic Wastewater	Intermittent Feeding	0.205187	0.205187	0.512968	42.6923	189.066	6.41026	94.7218	1.15385	127.019	0	0	342.375	440.197	9.91935	10.0407	423.726	716.096	29.1982	0.9592	0.274759	0.00116418	0.00116418	0.00116418	0.869919	1.04718	0.332536	NA	NA	8.69e-05	8.69e-05	NA	NA	300
Harris et al., 2015	10.1016/j.watres.2015.06.040	Pilot	Single Stage	Sequencing Batch Reactor (SBR)	SBR	2.5	Flocculent Sludge (FS)	FS	DuÃàbendorf, Switzerland	0.16	0.4	Partial Nitrification / Anammox (PNA)	PNA	2.2	Domestic Wastewater	Intermittent Feeding	0.325474	0.325474	0.813685	45	199.286	0	199.286	1.15385	49.6971	2.30769	7.58242	202.848	260.804	15.0323	5.79747	262.973	444.424	51.8168	0.8834	0.157043	0.00121681	0.00121681	0.00121681	1.53376	1.76359	0.560035	NA	NA	0.000232065	0.000232065	NA	NA	300
Harris et al., 2015	10.1016/j.watres.2015.06.040	Pilot	Single Stage	Sequencing Batch Reactor (SBR)	SBR	2.5	Flocculent Sludge (FS)	FS	DuÃàbendorf, Switzerland	0.16	0.4	Partial Nitrification / Anammox (PNA)	PNA	2.2	Domestic Wastewater	Intermittent Feeding	1.01893	1.01893	2.54732	36.9231	163.516	7.69231	146.496	13.0455	98.2297	47.3077	155.44	77.1062	99.1366	21.8022	27.1429	143.925	243.234	101.499	0.5827	0.0566941	0.0005579	0.0005579	0.0005579	2.49084	1.47742	0.469162	NA	NA	0.000608618	0.000608618	NA	NA	300
Harris et al., 2015	10.1016/j.watres.2015.06.040	Pilot	Single Stage	Sequencing Batch Reactor (SBR)	SBR	2.5	Flocculent Sludge (FS)	FS	DuÃàbendorf, Switzerland	0.16	0.4	Partial Nitrification / Anammox (PNA)	PNA	2.2	Domestic Wastewater	Intermittent Feeding	0.531735	0.531735	1.32934	35.7692	158.407	33.3333	93.4267	1.15384615 mgN/L/h	11.8868	2.30769	7.58242	63.7164	81.9211	13.9927	19.6978	103.103	174.245	38.7246	0.7778	0.054208	0.0015352	0.0015352	0.0015352	7.9304	5.67514	1.80216	NA	NA	0.00122002	0.00122002	NA	NA	300
Harris et al., 2015	10.1016/j.watres.2015.06.040	Pilot	Single Stage	Sequencing Batch Reactor (SBR)	SBR	2.5	Flocculent Sludge (FS)	FS	DuÃàbendorf, Switzerland	0.16	0.4	Partial Nitrification / Anammox (PNA)	PNA	2.2	Domestic Wastewater	Intermittent Feeding	0.955425	0.955425	2.38856	34.6154	153.297	10.2564	141.984	0	0	2.30769	7.58242	70.8951	91.1509	13.9011	45.989	105.511	178.313	70.1378	0.6067	0.04327	0.00174086	0.00174086	0.00174086	12.3901	6.28857	1.99696	NA	NA	0.0024291	0.0024291	NA	NA	300
Harris et al., 2015	10.1016/j.watres.2015.06.040	Pilot	Single Stage	Sequencing Batch Reactor (SBR)	SBR	2.5	Flocculent Sludge (FS)	FS	DuÃàbendorf, Switzerland	0.16	0.4	Partial Nitrification / Anammox (PNA)	PNA	2.2	Domestic Wastewater	Intermittent Feeding	0.329832	0.329832	0.82458	26.5385	117.527	10.2564	52.9946	1.62687	53.4542	2.30769	7.58242	160.492	206.347	14.2077	18.4153	203.299	343.575	28.5972	0.9168	0.125991	0.000841336	0.000841336	0.000841336	1.43898	1.57732	0.500884	NA	NA	0.000210334	0.000210334	NA	NA	300
Harris et al., 2015	10.1016/j.watres.2015.06.040	Pilot	Single Stage	Sequencing Batch Reactor (SBR)	SBR	2.5	Flocculent Sludge (FS)	FS	DuÃàbendorf, Switzerland	0.16	0.4	Partial Nitrification / Anammox (PNA)	PNA	2.2	Domestic Wastewater	Intermittent Feeding	0.357789	0.357789	0.894472	30	132.857	0	132.857	3.85075	101.22	2.30769	7.58242	115.618	148.652	9.82116	37.0492	176.424	298.157	61.1237	0.795	0.0948134	0.00053125	0.00053125	0.00053125	1.53005	1.14769	0.364454	NA	NA	0.000166016	0.000166016	NA	NA	300
Harris et al., 2015	10.1016/j.watres.2015.06.040	Pilot	Single Stage	Sequencing Batch Reactor (SBR)	SBR	2.5	Flocculent Sludge (FS)	FS	DuÃàbendorf, Switzerland	0.16	0.4	Partial Nitrification / Anammox (PNA)	PNA	2.2	Domestic Wastewater	Intermittent Feeding	0.315649	0.315649	0.789123	27.6923	122.637	21.7949	0	5.64179	296.597	2.30769	7.58242	193.33	248.567	11.2459	13.3958	311.291	526.082	12.7266	0.9758	0.205342	0.000799612	0.000799612	0.000799612	1.0929	0.979034	0.310896	NA	NA	0.000124939	0.000124939	NA	NA	300
Harris et al., 2015	10.1016/j.watres.2015.06.040	Pilot	Single Stage	Sequencing Batch Reactor (SBR)	SBR	2.5	Flocculent Sludge (FS)	FS	DuÃàbendorf, Switzerland	0.16	0.4	Partial Nitrification / Anammox (PNA)	PNA	2.2	Domestic Wastewater	Intermittent Feeding	0.507512	0.507512	1.26878	27.6923	122.637	21.7949	22.9526	7.75906	152.964	1.15385	3.79121	113.443	145.855	17.2131	10.1639	187.689	317.195	14.242	0.9551	0.121181	0.000692048	0.000692048	0.000692048	1.63934	1.40534	0.446272	NA	NA	0.000288353	0.000288353	NA	NA	300
Harris et al., 2015	10.1016/j.watres.2015.06.040	Pilot	Single Stage	Sequencing Batch Reactor (SBR)	SBR	2.5	Flocculent Sludge (FS)	FS	DuÃàbendorf, Switzerland	0.16	0.4	Partial Nitrification / Anammox (PNA)	PNA	2.2	Domestic Wastewater	Intermittent Feeding	0.641037	0.641037	1.60259	41.5385	183.956	0	183.956	10.4851	241.157	1.15385	3.79121	161.648	207.833	20.4508	18.4918	276.582	467.423	57.0748	0.8779	0.164139	0.000901294	0.000901294	0.000901294	1.53005	1.24202	0.394409	NA	NA	0.000321891	0.000321891	NA	NA	300
Harris et al., 2015	10.1016/j.watres.2015.06.040	Pilot	Single Stage	Sequencing Batch Reactor (SBR)	SBR	2.5	Flocculent Sludge (FS)	FS	DuÃàbendorf, Switzerland	0.16	0.4	Partial Nitrification / Anammox (PNA)	PNA	2.2	Domestic Wastewater	Intermittent Feeding	0.409719	0.409719	1.0243	40.3846	178.846	3.84615	147.835	12.8955	762.678	2.30769	7.58242	182.066	234.084	10.1148	0	454.57	768.223	35.6898	0.9535	0.293013	0.00412345	0.00412345	0.00412345	5.66204	3.45737	1.0979	NA	NA	0.000572702	0.000572702	NA	NA	300
Harris et al., 2015	10.1016/j.watres.2015.06.040	Pilot	Single Stage	Sequencing Batch Reactor (SBR)	SBR	2.5	Flocculent Sludge (FS)	FS	DuÃàbendorf, Switzerland	0.16	0.4	Partial Nitrification / Anammox (PNA)	PNA	2.2	Domestic Wastewater	Intermittent Feeding	1.16881	1.16881	2.92203	32.3077	143.077	38.1004	39.0777	54.2307692 mgN/L/h	1069.11	3.46154	11.3736	74.5657	95.8701	10.2727	12.9293	432.253	730.508	22.3417	0.9694	0.283267	0.00124848	0.00124848	0.00124848	4.83834	1.10085	0.349579	NA	NA	0.000520199	0.000520199	NA	NA	300
Harris et al., 2015	10.1016/j.watres.2015.06.040	Pilot	Single Stage	Sequencing Batch Reactor (SBR)	SBR	2.5	Flocculent Sludge (FS)	FS	DuÃàbendorf, Switzerland	0.16	0.4	Partial Nitrification / Anammox (PNA)	PNA	2.2	Domestic Wastewater	Intermittent Feeding	1.12648	1.12648	2.81619	31.1538	137.967	39.6773	44.7774	51.9231	1023.63	20.7692	68.2418	73.9037	95.019	8.83916	20.8687	416.596	704.047	47.1115	0.9331	0.262774	0.00206423	0.00206423	0.00206423	8.94809	1.88855	0.599717	NA	NA	0.000860097	0.000860097	NA	NA	300
Harris et al., 2015	10.1016/j.watres.2015.06.040	Pilot	Single Stage	Sequencing Batch Reactor (SBR)	SBR	2.5	Flocculent Sludge (FS)	FS	DuÃàbendorf, Switzerland	0.16	0.4	Partial Nitrification / Anammox (PNA)	PNA	2.2	Domestic Wastewater	Intermittent Feeding	1.53853	1.53853	3.84632	35.7692	158.407	39.4444	61.4639	66.9231	879.56	0	0	75.8601	97.5345	13.8741	20.3636	379.322	641.054	29.7173	0.9536	0.244535	0.000325006	0.000325006	0.000325006	1.3537	0.326564	0.103702	NA	NA	0.000203129	0.000203129	NA	NA	300
Scaglione et al., 2015	10.1016/j.biortech.2014.11.019	Pilot	Single Stage	Sequencing Batch Reactor (SBR)	SBR	2.5	Flocculent Sludge (FS)	FS	Milano, Italy	0.338	0.65	Partial Nitrification (PN)	PN	3.43	Swine Wastewater	None	0.56 kgNm-3d-1	0.364	0.56	0	0	4.49622	19.9118	0	0	605.824	1990.57	1259.3	1619.1	481.553	619.139	1619.1	1619.1	527.225	0.6744	0.342696	0.3432	0.3432	0.3432	15% NLR	22.2429	15	NA	NA	0.011	0.011	103.742	NA	2350
Scaglione et al., 2015	10.1016/j.biortech.2014.11.019	Pilot	Single Stage	Sequencing Batch Reactor (SBR)	SBR	2.5	Flocculent Sludge (FS)	FS	Milano, Italy	0.338	0.65	Partial Nitrification (PN)	PN	3.43	Swine Wastewater	None	0.55	0.3575	0.55	0	0	6.44542	28.544	0	0	527.595	1733.53	1072.83	1379.35	411.336	528.861	1379.35	1379.35	433.974	0.6854	0.282083	0.1573	0.1573	0.1573	7	10.2133	7	NA	NA	0.00504167	0.00504167	103.742	NA	2350
Scaglione et al., 2015	10.1016/j.biortech.2014.11.019	Pilot	Single Stage	Sequencing Batch Reactor (SBR)	SBR	2.5	Flocculent Sludge (FS)	FS	Milano, Italy	0.338	0.65	Partial Nitrification (PN)	PN	3.43	Swine Wastewater	None	0.41	0.2665	0.41	0	0	10.1369	44.8918	0	0	716.929	2355.62	1189.98	1529.98	500.447	643.432	1529.98	1529.98	302.463	0.8023	0.196601	0.0502543	0.0502543	0.0502543	3	3.73921	3	NA	NA	0.00161071	0.00161071	103.742	NA	2350
Scaglione et al., 2015	10.1016/j.biortech.2014.11.019	Lab	Single Stage	Sequencing Batch Reactor (SBR)	SBR	2.5	Flocculent Sludge (FS)	FS	Milano, Italy	0.338	0.003	Anammox (AMX)	AMX	0	Swine Wastewater	None	0.55	0.00165	0.55	0.881661	3.9045	55.2448	244.655	197.316	648.325	54.5455	179.221	558	717.429	88.1119	113.287	1369.66	1369.66	1171.76	0.1445	0.00351527	8.3e-06	8.3e-06	8.3e-06	0.08	0.553671	0.08	NA	NA	5.76e-05	5.76e-05	NA	NA	NA
Scaglione et al., 2015	10.1016/j.biortech.2014.11.019	Lab	Single Stage	Sequencing Batch Reactor (SBR)	SBR	2.5	Flocculent Sludge (FS)	FS	Milano, Italy	0.338	0.003	Anammox (AMX)	AMX	0	Swine Wastewater	None	0.61	0.00183	0.61	2.87356	12.7258	13.2867	58.8412	712.447	2340.9	2.7972	9.19081	455.876	586.127	139.161	178.921	2939.75	2939.75	2784.51	0.0528	0.00835352	2.19e-05	2.19e-05	2.19e-05	0.19	3.59788	0.19	NA	NA	0.000151774	0.000151774	NA	NA	NA
Gabarro et al., 2014	10.1016/j.biortech.2014.04.019	Pilot	Aerated	Sequencing Batch Reactor (SBR)	SBR	2.5	Flocculent Sludge (FS)	FS	Catalonia, Spain	0.256	0.1805	Partial Nitrification (PN)	PN	3.43	Landfill Leachate	None	0.989245	0.178559	0.989245	0	0	0	0	2	6.57143	845.601	2536.8	2237.65	2876.97	1115.49	1434.2	2619.37	2619.37	2224.75	0.5015	0.0712287	0.0217302	0.0217302	0.0217302	16.8357	11.1751	1.68357	1.68357	11.1751	0.361167	0.361167	39.0712	NA	5270.27
Gabarro et al., 2014	10.1016/j.biortech.2014.04.019	Pilot	Aerated	Sequencing Batch Reactor (SBR)	SBR	2.5	Flocculent Sludge (FS)	FS	Catalonia, Spain	0.256	0.1805	Partial Nitrification (PN)	PN	3.43	Landfill Leachate	None	0.989245	0.178559	0.989245	0	0	0	0	2	6.57143	845.601	2536.8	2237.65	2876.97	1115.49	1434.2	2619.37	2619.37	2224.75	0.5015	0.0712287	0.0207825	0.0207825	0.0207825	16.1014	10.6877	1.61014	1.61014	10.6877	0.345415	0.345415	39.0712	NA	5270.27
Gabarro et al., 2014	10.1016/j.biortech.2014.04.019	Pilot	Aerated	Sequencing Batch Reactor (SBR)	SBR	2.5	Flocculent Sludge (FS)	FS	Catalonia, Spain	0.256	0.1805	Partial Nitrification (PN)	PN	3.43	Landfill Leachate	None	0.989245	0.178559	0.989245	0	0	0	0	2	6.57143	845.601	2536.8	2237.65	2876.97	1115.49	1434.2	2619.37	2619.37	2224.75	0.5015	0.0712287	0.0163823	0.0163823	0.0163823	12.6923	8.42481	1.26923	1.26923	8.42481	0.272281	0.272281	39.0712	NA	5270.27
Gabarro et al., 2014	10.1016/j.biortech.2014.04.019	Pilot	Aerated	Sequencing Batch Reactor (SBR)	SBR	2.5	Flocculent Sludge (FS)	FS	Catalonia, Spain	0.256	0.1805	Partial Nitrification (PN)	PN	3.43	Landfill Leachate	None	1.01179	0.182627	1.01179	0	0	0.0800256	0.354399	2	6.57143	973.081	2919.24	2301.22	2958.71	1079.63	1388.09	2511.29	2511.29	2278.12	0.5308	0.0420876	0.021533	0.021533	0.021533	16.3112	17.5673	1.63112	1.63112	17.5673	0.357888	0.357888	39.0712	NA	4432.43
Gabarro et al., 2014	10.1016/j.biortech.2014.04.019	Pilot	Aerated	Sequencing Batch Reactor (SBR)	SBR	2.5	Flocculent Sludge (FS)	FS	Catalonia, Spain	0.256	0.1805	Partial Nitrification (PN)	PN	3.43	Landfill Leachate	None	1.01179	0.182627	1.01179	0	0	0.0800256	0.354399	2	6.57143	973.081	2919.24	2301.22	2958.71	1079.63	1388.09	2511.29	2511.29	2278.12	0.5308	0.0420876	0.0171017	0.0171017	0.0171017	12.9545	13.9522	1.29545	1.29545	13.9522	0.284239	0.284239	39.0712	NA	4432.43
Gabarro et al., 2014	10.1016/j.biortech.2014.04.019	Pilot	Aerated	Sequencing Batch Reactor (SBR)	SBR	2.5	Flocculent Sludge (FS)	FS	Catalonia, Spain	0.256	0.1805	Partial Nitrification (PN)	PN	3.43	Landfill Leachate	None	1.01179	0.182627	1.01179	0	0	0.0800256	0.354399	2	6.57143	973.081	2919.24	2301.22	2958.71	1079.63	1388.09	2511.29	2511.29	2278.12	0.5308	0.0420876	0.0168248	0.0168248	0.0168248	12.7448	13.7263	1.27448	1.27448	13.7263	0.279636	0.279636	39.0712	NA	4432.43
Gabarro et al., 2014	10.1016/j.biortech.2014.04.019	Pilot	Aerated	Sequencing Batch Reactor (SBR)	SBR	2.5	Flocculent Sludge (FS)	FS	Catalonia, Spain	0.256	0.1805	Partial Nitrification (PN)	PN	3.43	Landfill Leachate	None	1.06095	0.191501	1.06095	0	0	0	0	2	6.57143	916.123	2748.37	2230.04	2867.2	1058.17	1360.5	2313.82	2313.82	2215.16	0.5255	0.0178072	0.00893005	0.00893005	0.00893005	12.9021	30.2602	1.29021	1.29021	30.2602	0.148422	0.148422	39.0712	NA	3972.97
Gabarro et al., 2014	10.1016/j.biortech.2014.04.019	Pilot	Aerated	Sequencing Batch Reactor (SBR)	SBR	2.5	Flocculent Sludge (FS)	FS	Catalonia, Spain	0.256	0.1805	Partial Nitrification (PN)	PN	3.43	Landfill Leachate	None	1.06095	0.191501	1.06095	0	0	0	0	2	6.57143	916.123	2748.37	2230.04	2867.2	1058.17	1360.5	2313.82	2313.82	2215.16	0.5255	0.0178072	0.0196752	0.0196752	0.0196752	14.2133	33.3354	1.42133	1.42133	33.3354	0.327011	0.327011	39.0712	NA	3972.97
Gabarro et al., 2014	10.1016/j.biortech.2014.04.019	Pilot	Aerated	Sequencing Batch Reactor (SBR)	SBR	2.5	Flocculent Sludge (FS)	FS	Catalonia, Spain	0.256	0.1805	Partial Nitrification (PN)	PN	3.43	Landfill Leachate	None	1.06095	0.191501	1.06095	0	0	0	0	2	6.57143	916.123	2748.37	2230.04	2867.2	1058.17	1360.5	2313.82	2313.82	2215.16	0.5255	0.0178072	0.0100917	0.0100917	0.0100917	14.5804	34.1965	1.45804	1.45804	34.1965	0.167729	0.167729	39.0712	NA	3972.97
Gabarro et al., 2014	10.1016/j.biortech.2014.04.019	Pilot	Aerated	Sequencing Batch Reactor (SBR)	SBR	2.5	Flocculent Sludge (FS)	FS	Catalonia, Spain	0.256	0.1805	Partial Nitrification (PN)	PN	3.43	Landfill Leachate	None	1.06095	0.191501	1.06095	0	0	0	0	2	6.57143	916.123	2748.37	2230.04	2867.2	1058.17	1360.5	2313.82	2313.82	2215.16	0.5255	0.0178072	0.0102369	0.0102369	0.0102369	14.7902	34.6885	1.47902	1.47902	34.6885	0.170142	0.170142	39.0712	NA	3972.97
Gabarro et al., 2014	10.1016/j.biortech.2014.04.019	Pilot	Aerated	Sequencing Batch Reactor (SBR)	SBR	2.5	Flocculent Sludge (FS)	FS	Catalonia, Spain	0.256	0.1805	Partial Nitrification (PN)	PN	3.43	Landfill Leachate	None	1.01909	0.183946	1.01909	0	0	0	0	2	6.57143	986.796	2960.39	2137.36	2748.04	1050.72	1350.92	2501.72	2501.72	2223.68	0.5084	0.050186	0.0208516	0.0208516	0.0208516	15.6818	14.1101	1.56818	1.56818	14.1101	0.346565	0.346565	39.0712	NA	4189.19
Gabarro et al., 2014	10.1016/j.biortech.2014.04.019	Pilot	Aerated	Sequencing Batch Reactor (SBR)	SBR	2.5	Flocculent Sludge (FS)	FS	Catalonia, Spain	0.256	0.1805	Partial Nitrification (PN)	PN	3.43	Landfill Leachate	None	1.01909	0.183946	1.01909	0	0	0	0	2	6.57143	986.796	2960.39	2137.36	2748.04	1050.72	1350.92	2501.72	2501.72	2223.68	0.5084	0.050186	0.0207122	0.0207122	0.0207122	15.5769	14.0157	1.55769	1.55769	14.0157	0.344247	0.344247	39.0712	NA	4189.19
Gabarro et al., 2014	10.1016/j.biortech.2014.04.019	Pilot	Aerated	Sequencing Batch Reactor (SBR)	SBR	2.5	Flocculent Sludge (FS)	FS	Catalonia, Spain	0.256	0.1805	Partial Nitrification (PN)	PN	3.43	Landfill Leachate	None	0.969772	0.175044	0.969772	0	0	0	0	2	6.57143	929.838	2789.51	2052	2638.28	1050.58	1350.74	2393.89	2393.89	2151.75	0.488	0.0437064	0.0196434	0.0196434	0.0196434	15.5245	15.3481	1.55245	1.55245	15.3481	0.326483	0.326483	39.0712	NA	3243.24
Gabarro et al., 2014	10.1016/j.biortech.2014.04.019	Pilot	Aerated	Sequencing Batch Reactor (SBR)	SBR	2.5	Flocculent Sludge (FS)	FS	Catalonia, Spain	0.256	0.1805	Partial Nitrification (PN)	PN	3.43	Landfill Leachate	None	0.969772	0.175044	0.969772	0	0	0	0	2	6.57143	929.838	2789.51	2052	2638.28	1050.58	1350.74	2393.89	2393.89	2151.75	0.488	0.0437064	0.0195107	0.0195107	0.0195107	15.4196	15.2444	1.54196	1.54196	15.2444	0.324277	0.324277	39.0712	NA	3243.24
Gabarro et al., 2014	10.1016/j.biortech.2014.04.019	Pilot	Non-aerated	Sequencing Batch Reactor (SBR)	SBR	2.5	Flocculent Sludge (FS)	FS	Catalonia, Spain	0.256	0.1805	Partial Nitrification (PN)	PN	3.43	Landfill Leachate	None	0.989245	0.178559	0.989245	0	0	0	0	2	6.57143	845.601	2536.8	2237.65	2876.97	1115.49	1434.2	2619.37	2619.37	2224.75	0.1507	0.0712287	0.0173977	0.0173977	0.0173977	13.479	8.94701	1.3479	1.3479	8.94701	0.289158	0.289158	39.0712	NA	5270.27
Gabarro et al., 2014	10.1016/j.biortech.2014.04.019	Pilot	Non-aerated	Sequencing Batch Reactor (SBR)	SBR	2.5	Flocculent Sludge (FS)	FS	Catalonia, Spain	0.256	0.1805	Partial Nitrification (PN)	PN	3.43	Landfill Leachate	None	0.989245	0.178559	0.989245	0	0	0	0	2	6.57143	845.601	2536.8	2237.65	2876.97	1115.49	1434.2	2619.37	2619.37	2224.75	0.1507	0.0712287	0.0264689	0.0264689	0.0264689	20.507	13.612	2.0507	2.0507	13.612	0.439926	0.439926	39.0712	NA	5270.27
Gabarro et al., 2014	10.1016/j.biortech.2014.04.019	Pilot	Non-aerated	Sequencing Batch Reactor (SBR)	SBR	2.5	Flocculent Sludge (FS)	FS	Catalonia, Spain	0.256	0.1805	Partial Nitrification (PN)	PN	3.43	Landfill Leachate	None	0.989245	0.178559	0.989245	0	0	0	0	2	6.57143	845.601	2536.8	2237.65	2876.97	1115.49	1434.2	2619.37	2619.37	2224.75	0.1507	0.0712287	0.0257919	0.0257919	0.0257919	19.9825	13.2638	1.99825	1.99825	13.2638	0.428674	0.428674	39.0712	NA	5270.27
Gabarro et al., 2014	10.1016/j.biortech.2014.04.019	Pilot	Non-aerated	Sequencing Batch Reactor (SBR)	SBR	2.5	Flocculent Sludge (FS)	FS	Catalonia, Spain	0.256	0.1805	Partial Nitrification (PN)	PN	3.43	Landfill Leachate	None	1.01179	0.182627	1.01179	0	0	0.0800256	0.354399	2	6.57143	973.081	2919.24	2301.22	2958.71	1079.63	1388.09	2511.29	2511.29	2278.12	0.0928	0.0420876	0.0268643	0.0268643	0.0268643	20.3497	21.9168	2.03497	2.03497	21.9168	0.446497	0.446497	39.0712	NA	4432.43
Gabarro et al., 2014	10.1016/j.biortech.2014.04.019	Pilot	Non-aerated	Sequencing Batch Reactor (SBR)	SBR	2.5	Flocculent Sludge (FS)	FS	Catalonia, Spain	0.256	0.1805	Partial Nitrification (PN)	PN	3.43	Landfill Leachate	None	1.01179	0.182627	1.01179	0	0	0.0800256	0.354399	2	6.57143	973.081	2919.24	2301.22	2958.71	1079.63	1388.09	2511.29	2511.29	2278.12	0.0928	0.0420876	0.0281105	0.0281105	0.0281105	21.2937	22.9336	2.12937	2.12937	22.9336	0.467211	0.467211	39.0712	NA	4432.43
Gabarro et al., 2014	10.1016/j.biortech.2014.04.019	Pilot	Non-aerated	Sequencing Batch Reactor (SBR)	SBR	2.5	Flocculent Sludge (FS)	FS	Catalonia, Spain	0.256	0.1805	Partial Nitrification (PN)	PN	3.43	Landfill Leachate	None	1.01179	0.182627	1.01179	0	0	0.0800256	0.354399	2	6.57143	973.081	2919.24	2301.22	2958.71	1079.63	1388.09	2511.29	2511.29	2278.12	0.0928	0.0420876	0.0293568	0.0293568	0.0293568	22.2378	23.9503	2.22378	2.22378	23.9503	0.487925	0.487925	39.0712	NA	4432.43
Gabarro et al., 2014	10.1016/j.biortech.2014.04.019	Pilot	Non-aerated	Sequencing Batch Reactor (SBR)	SBR	2.5	Flocculent Sludge (FS)	FS	Catalonia, Spain	0.256	0.1805	Partial Nitrification (PN)	PN	3.43	Landfill Leachate	None	1.06095	0.191501	1.06095	0	0	0	0	2	6.57143	916.123	2748.37	2230.04	2867.2	1058.17	1360.5	2313.82	2313.82	2215.16	0.0426	0.0178072	0.0155731	0.0155731	0.0155731	22.5	52.7709	2.25	2.25	52.7709	0.258833	0.258833	39.0712	NA	3972.97
Gabarro et al., 2014	10.1016/j.biortech.2014.04.019	Pilot	Non-aerated	Sequencing Batch Reactor (SBR)	SBR	2.5	Flocculent Sludge (FS)	FS	Catalonia, Spain	0.256	0.1805	Partial Nitrification (PN)	PN	3.43	Landfill Leachate	None	1.06095	0.191501	1.06095	0	0	0	0	2	6.57143	916.123	2748.37	2230.04	2867.2	1058.17	1360.5	2313.82	2313.82	2215.16	0.0426	0.0178072	0.0276614	0.0276614	0.0276614	19.9825	46.8664	1.99825	1.99825	46.8664	0.459746	0.459746	39.0712	NA	3972.97
Gabarro et al., 2014	10.1016/j.biortech.2014.04.019	Pilot	Non-aerated	Sequencing Batch Reactor (SBR)	SBR	2.5	Flocculent Sludge (FS)	FS	Catalonia, Spain	0.256	0.1805	Partial Nitrification (PN)	PN	3.43	Landfill Leachate	None	1.06095	0.191501	1.06095	0	0	0	0	2	6.57143	916.123	2748.37	2230.04	2867.2	1058.17	1360.5	2313.82	2313.82	2215.16	0.0426	0.0178072	0.0140122	0.0140122	0.0140122	20.2448	47.4815	2.02448	2.02448	47.4815	0.23289	0.23289	39.0712	NA	3972.97
Gabarro et al., 2014	10.1016/j.biortech.2014.04.019	Pilot	Non-aerated	Sequencing Batch Reactor (SBR)	SBR	2.5	Flocculent Sludge (FS)	FS	Catalonia, Spain	0.256	0.1805	Partial Nitrification (PN)	PN	3.43	Landfill Leachate	None	1.06095	0.191501	1.06095	0	0	0	0	2	6.57143	916.123	2748.37	2230.04	2867.2	1058.17	1360.5	2313.82	2313.82	2215.16	0.0426	0.0178072	0.0147745	0.0147745	0.0147745	21.3462	50.0647	2.13462	2.13462	50.0647	0.24556	0.24556	39.0712	NA	3972.97
Gabarro et al., 2014	10.1016/j.biortech.2014.04.019	Pilot	Non-aerated	Sequencing Batch Reactor (SBR)	SBR	2.5	Flocculent Sludge (FS)	FS	Catalonia, Spain	0.256	0.1805	Partial Nitrification (PN)	PN	3.43	Landfill Leachate	None	1.01909	0.183946	1.01909	0	0	0	0	2	6.57143	986.796	2960.39	2137.36	2748.04	1050.72	1350.92	2501.72	2501.72	2223.68	0.1111	0.050186	0.0308939	0.0308939	0.0308939	23.2343	20.9056	2.32343	2.32343	20.9056	0.513472	0.513472	39.0712	NA	4189.19
Gabarro et al., 2014	10.1016/j.biortech.2014.04.019	Pilot	Non-aerated	Sequencing Batch Reactor (SBR)	SBR	2.5	Flocculent Sludge (FS)	FS	Catalonia, Spain	0.256	0.1805	Partial Nitrification (PN)	PN	3.43	Landfill Leachate	None	1.01909	0.183946	1.01909	0	0	0	0	2	6.57143	986.796	2960.39	2137.36	2748.04	1050.72	1350.92	2501.72	2501.72	2223.68	0.1111	0.050186	0.030615	0.030615	0.030615	23.0245	20.7168	2.30245	2.30245	20.7168	0.508836	0.508836	39.0712	NA	4189.19
Gabarro et al., 2014	10.1016/j.biortech.2014.04.019	Pilot	Non-aerated	Sequencing Batch Reactor (SBR)	SBR	2.5	Flocculent Sludge (FS)	FS	Catalonia, Spain	0.256	0.1805	Partial Nitrification (PN)	PN	3.43	Landfill Leachate	None	0.969772	0.175044	0.969772	0	0	0	0	2	6.57143	929.838	2789.51	2052	2638.28	1050.58	1350.74	2393.89	2393.89	2151.75	0.1011	0.0437064	0.0288014	0.0288014	0.0288014	22.7622	22.5036	2.27622	2.27622	22.5036	0.478694	0.478694	39.0712	NA	3243.24
Gabarro et al., 2014	10.1016/j.biortech.2014.04.019	Pilot	Non-aerated	Sequencing Batch Reactor (SBR)	SBR	2.5	Flocculent Sludge (FS)	FS	Catalonia, Spain	0.256	0.1805	Partial Nitrification (PN)	PN	3.43	Landfill Leachate	None	0.969772	0.175044	0.969772	0	0	0	0	2	6.57143	929.838	2789.51	2052	2638.28	1050.58	1350.74	2393.89	2393.89	2151.75	0.1011	0.0437064	0.0291332	0.0291332	0.0291332	23.0245	22.7629	2.30245	2.30245	22.7629	0.484209	0.484209	39.0712	NA	3243.24
Kong et al., 2013	10.1016/j.cej.2012.10.093	Lab	Single Stage	Sequencing Batch Biofilm Reactor (SBBR)	SBBR	2.5	Biofilm (BF)	BF	Jinan, China	0.6838	0.006	Partial Nitrification (PN)	PN	3.43	Synthetic Wastewater	None	3 kgNm-3d-1	0.018	3	0	0	33.4792	33.4792	0	0	266.849	266.849	505.142	505.142	240.263	240.263	392.888	392.888	124.263	0.3163	0.000745576	12.1245	12.1245	1.21e-05	0.5018315 %NL	1.03485	0.501831	NA	NA	0.000252595	0.000252595	NA	NA	0
Kong et al., 2013	10.1016/j.cej.2012.10.093	Lab	Single Stage	Sequencing Batch Biofilm Reactor (SBBR)	SBBR	2.5	Biofilm (BF)	BF	Jinan, China	0.6838	0.006	Partial Nitrification (PN)	PN	3.43	Synthetic Wastewater	None	3	0.018	3	0	0	26.5864	26.5864	0	0	245.186	245.186	498.249	498.249	240.263	240.263	387.527	387.527	125.606	0.3241	0.000753635	20.7326	20.7326	2.07e-05	0.882784	1.75065	0.882784	NA	NA	0.000431929	0.000431929	NA	NA	0
Kong et al., 2013	10.1016/j.cej.2012.10.093	Lab	Single Stage	Sequencing Batch Biofilm Reactor (SBBR)	SBBR	2.5	Biofilm (BF)	BF	Jinan, China	0.6838	0.006	Partial Nitrification (PN)	PN	3.43	Synthetic Wastewater	None	3	0.018	3	0	0	29.5405	29.5405	0	0	241.247	241.247	446.061	446.061	223.523	223.523	346.937	346.937	99.1858	0.2859	0.000595115	14.9451	14.9451	1.49e-05	0.684982	1.59809	0.684982	NA	NA	0.000311355	0.000311355	NA	NA	0
Kong et al., 2013	10.1016/j.cej.2012.10.093	Lab	Single Stage	Sequencing Batch Biofilm Reactor (SBBR)	SBBR	2.5	Biofilm (BF)	BF	Jinan, China	0.6838	0.006	Partial Nitrification (PN)	PN	3.43	Synthetic Wastewater	None	3	0.018	3	0	0	26.5864	26.5864	0	0	241.247	241.247	475.602	475.602	234.354	234.354	369.912	369.912	113.785	0.3076	0.000682709	24.2857	24.2857	2.43e-05	1.06593	2.26371	1.06593	NA	NA	0.000505952	0.000505952	NA	NA	0
Kong et al., 2013	10.1016/j.cej.2012.10.093	Lab	Single Stage	Sequencing Batch Biofilm Reactor (SBBR)	SBBR	2.5	Biofilm (BF)	BF	Jinan, China	0.6838	0.006	Partial Nitrification (PN)	PN	3.43	Synthetic Wastewater	None	3	0.018	3	0	0	26.5864	26.5864	0	0	256.018	256.018	472.648	472.648	229.431	229.431	367.615	367.615	110.821	0.3015	0.000664928	17.0696	17.0696	1.71e-05	0.761905	1.63363	0.761905	NA	NA	0.000355617	0.000355617	NA	NA	0
Kong et al., 2013	10.1016/j.cej.2012.10.093	Lab	Single Stage	Sequencing Batch Biofilm Reactor (SBBR)	SBBR	2.5	Biofilm (BF)	BF	Jinan, China	0.6838	0.006	Partial Nitrification (PN)	PN	3.43	Synthetic Wastewater	None	3	0.018	3	0	0	29.5405	29.5405	0	0	253.063	253.063	485.449	485.449	244.201	244.201	377.571	377.571	110.141	0.2917	0.000660846	16.2271	16.2271	1.62e-05	0.695971	1.56259	0.695971	NA	NA	0.000338065	0.000338065	NA	NA	0
Kong et al., 2013	10.1016/j.cej.2012.10.093	Lab	Single Stage	Sequencing Batch Biofilm Reactor (SBBR)	SBBR	2.5	Biofilm (BF)	BF	Jinan, China	0.6838	0.006	Partial Nitrification (PN)	PN	3.43	Synthetic Wastewater	None	3	0.018	3	0	0	29.5405	29.5405	0	0	245.186	245.186	468.709	468.709	254.048	254.048	364.551	364.551	91.8601	0.252	0.000551161	22.0879	22.0879	2.21e-05	0.992674	2.55024	0.992674	NA	NA	0.000460165	0.000460165	NA	NA	0
Hausherr et al., 2022	10.1016/j.wroa.2022.100145	Pilot	Aerated	Sequencing Batch Reactor (SBR)	SBR	2.5	Flocculent Sludge (FS)	FS	DuÃàbendorf, Switzerland	0.102	8	Partial Nitrification (PN)	PN	3.43	Domestic Wastewater	None	0.746304	0.746304	0.093288	0.4	1.77143	0	0	0.3	0.985714	90% nitritation efficiency	59.1429	20	25.7143	3.25	4.17857	20.7	34.983	13.733	0.9	0.109864	21.0571	0.0210571	0.0210571	5 % NH4 comsumed	5	4.5	NA	NA	0.00029246	0.00029246	NA	NA	137
Hausherr et al., 2022	10.1016/j.wroa.2022.100145	Pilot	Aerated	Sequencing Batch Reactor (SBR)	SBR	2.5	Flocculent Sludge (FS)	FS	DuÃàbendorf, Switzerland	0.102	8	Partial Nitrification (PN)	PN	3.43	Domestic Wastewater	None	0.746304	0.746304	0.093288	0.4	1.77143	0	0	0.3	0.985714	0.84	55.2	20	25.7143	3.25	4.17857	20.7	34.983	14.933	0.84	0.119464	29.0589	0.0290589	0.0290589	6.9	6.9	5.796	NA	NA	0.000403595	0.000403595	NA	NA	137
Hausherr et al., 2022	10.1016/j.wroa.2022.100145	Pilot	Aerated	Sequencing Batch Reactor (SBR)	SBR	2.5	Flocculent Sludge (FS)	FS	DuÃàbendorf, Switzerland	0.102	8	Partial Nitrification (PN)	PN	3.43	Domestic Wastewater	None	0.746304	0.746304	0.093288	0.4	1.77143	0	0	0.3	0.985714	0.45	29.5714	20	25.7143	3.25	4.17857	20.7	34.983	22.733	0.45	0.181864	72.0154	0.0720154	0.0720154	17.1	17.1	7.695	NA	NA	0.00100021	0.00100021	NA	NA	137
Hausherr et al., 2022	10.1016/j.wroa.2022.100145	Pilot	Aerated	Sequencing Batch Reactor (SBR)	SBR	2.5	Flocculent Sludge (FS)	FS	DuÃàbendorf, Switzerland	0.102	8	Partial Nitrification (PN)	PN	3.43	Domestic Wastewater	None	0.769739	0.769739	0.0962173	0.425	1.88214	0	0	0.3	0.985714	0.94	63.7018	20.625	26.5179	3.25	4.17857	21.35	36.0815	13.444	0.94	0.107552	14.8531	0.0148531	0.0148531	3.4	3.4	3.196	NA	NA	0.000206294	0.000206294	NA	NA	178.5
Hausherr et al., 2022	10.1016/j.wroa.2022.100145	Pilot	Aerated	Sequencing Batch Reactor (SBR)	SBR	2.5	Flocculent Sludge (FS)	FS	DuÃàbendorf, Switzerland	0.102	8	Partial Nitrification (PN)	PN	3.43	Domestic Wastewater	Pre-dosing	0.769739	0.769739	0.0962173	0.425	1.88214	0	0	0.3	0.985714	0.92	62.3464	20.625	26.5179	3.25	4.17857	21.35	36.0815	13.8565	0.92	0.110852	23.1534	0.0231534	0.0231534	5.3	5.3	4.876	NA	NA	0.000321575	0.000321575	NA	NA	178.5
Hausherr et al., 2022	10.1016/j.wroa.2022.100145	Pilot	Aerated	Sequencing Batch Reactor (SBR)	SBR	2.5	Flocculent Sludge (FS)	FS	DuÃàbendorf, Switzerland	0.102	8	Partial Nitrification (PN)	PN	3.43	Domestic Wastewater	Post-Dosing	0.769739	0.769739	0.0962173	0.425	1.88214	0	0	0.3	0.985714	0.87	58.958	20.625	26.5179	3.25	4.17857	21.35	36.0815	14.8878	0.87	0.119102	22.7166	0.0227166	0.0227166	5.2	5.2	4.524	NA	NA	0.000315508	0.000315508	NA	NA	178.5
Hausherr et al., 2022	10.1016/j.wroa.2022.100145	Pilot	Aerated	Sequencing Batch Reactor (SBR)	SBR	2.5	Flocculent Sludge (FS)	FS	DuÃàbendorf, Switzerland	0.102	8	Partial Nitrification (PN)	PN	3.43	Domestic Wastewater	None	0.746304	0.746304	0.093288	0.4	1.77143	0	0	0.3	0.985714	90% nitritation efficiency	59.1429	20	25.7143	400	514.286	20.7	34.983	-383.017	0.9	-3.06414	-477.714	-0.477714	-0.477714	1.2	1.33333	1.2	NA	NA	-0.00663492	-0.00663492	NA	NA	137
Hausherr et al., 2022	10.1016/j.wroa.2022.100145	Pilot	Non-aerated	Sequencing Batch Reactor (SBR)	SBR	2.5	Flocculent Sludge (FS)	FS	DuÃàbendorf, Switzerland	0.102	8	Anammox (AMX)	AMX	0	Domestic Wastewater	Intermittent Feeding	0.458188	0.458188	0.0572735	0	0	0.9	3.98571	3.575	11.7464	0.1	1.06786	3.25	4.17857	0.4	0.514286	6.825	11.5343	9.90925	0.1	0.079274	0.204939	0.000204939	0.000204939	0.286	0.286	0.040293	NA	NA	5.3e-06	5.3e-06	NA	NA	40
Fenu et al., 2020	10.1007/s11356-019-07047-0	Pilot	Aerated	Sequencing Batch Reactor (SBR)	SBR	2.5	Flocculent Sludge (FS)	FS	Aartselaar, Belgium	0.15	1.5	Partial Nitrification (PN)	PN	3.43	Domestic Wastewater	Intermittant Aeration	0.22	0.22	0.146667	0	0	32	141.714	0	0	1	3.28571	440	565.714	102	131.143	440	440	0.4575	0.6932	0.4575	0.64	0.004224	0.004224	0.587541	0.923279	0.64	NA	NA	0.0004224	0.0004224	NA	NA	955
Fenu et al., 2020	10.1007/s11356-019-07047-1	Pilot	Non-aerated	Sequencing Batch Reactor (SBR)	SBR	2.5	Flocculent Sludge (FS)	FS	Aartselaar, Belgium	0.15	1.5	Anammox (AMX)	AMX	0	Domestic Wastewater	Intermittant Aeration	0.22	0.22	0.146667	0	0	32	141.714	0	0	1	3.28571	440	565.714	102	131.143	440	440	0.4575	0.6932	0.4575	0.12	0.000792	0.000792	0.110164	0.173115	0.12	NA	NA	7.92e-05	7.92e-05	NA	NA	955
Fenu et al., 2020	10.1007/s11356-019-07047-2	Pilot	Single Stage	Sequencing Batch Reactor (SBR)	SBR	2.5	Flocculent Sludge (FS)	FS	Aartselaar, Belgium	0.15	1.5	Partial Nitrification / Anammox (PNA)	PNA	2.2	Domestic Wastewater	Intermittant Aeration	0.22	0.22	0.146667	0	0	32	141.714	0	0	1	3.28571	440	565.714	102	131.143	440	440	0.4575	0.6932	0.4575	0.76	0.005016	0.005016	0.697705	1.09639	0.76	NA	NA	0.0005016	0.0005016	NA	NA	955
Fenu et al., 2020	10.1007/s11356-019-07047-3	Pilot	Aerated	Sequencing Batch Reactor (SBR)	SBR	2.5	Flocculent Sludge (FS)	FS	Aartselaar, Belgium	0.15	1.5	Partial Nitrification (PN)	PN	3.43	Domestic Wastewater	Intermittant Aeration	0.2	0.2	0.133333	0	0	32	141.714	0	0	1	3.28571	400	514.286	102	131.143	400	400	0.3975	0.6625	0.3975	1.9	0.0114	0.0114	1.82504	2.86792	1.9	NA	NA	0.00114	0.00114	NA	NA	955
Fenu et al., 2020	10.1007/s11356-019-07047-4	Pilot	Non-aerated	Sequencing Batch Reactor (SBR)	SBR	2.5	Flocculent Sludge (FS)	FS	Aartselaar, Belgium	0.15	1.5	Anammox (AMX)	AMX	0	Domestic Wastewater	Intermittant Aeration	0.2	0.2	0.133333	0	0	32	141.714	0	0	1	3.28571	400	514.286	102	131.143	400	400	0.3975	0.6625	0.3975	0.55	0.0033	0.0033	0.528302	0.830189	0.55	NA	NA	0.00033	0.00033	NA	NA	955
Fenu et al., 2020	10.1007/s11356-019-07047-5	Pilot	Single Stage	Sequencing Batch Reactor (SBR)	SBR	2.5	Flocculent Sludge (FS)	FS	Aartselaar, Belgium	0.15	1.5	Partial Nitrification / Anammox (PNA)	PNA	2.2	Domestic Wastewater	Intermittant Aeration	0.2	0.2	0.133333	0	0	32	141.714	0	0	1	3.28571	400	514.286	102	131.143	400	400	0.3975	0.6625	0.3975	2.45	0.0147	0.0147	2.35334	3.69811	2.45	NA	NA	0.00147	0.00147	NA	NA	955
Fenu et al., 2020	10.1007/s11356-019-07047-6	Pilot	Aerated	Sequencing Batch Reactor (SBR)	SBR	2.5	Flocculent Sludge (FS)	FS	Aartselaar, Belgium	0.15	1.5	Partial Nitrification (PN)	PN	3.43	Domestic Wastewater	Intermittant Aeration	0.26	0.26	0.173333	0	0	32	141.714	0	0	1	3.28571	520	668.571	102	131.143	520	520	0.5775	0.7404	0.5775	1.36	0.010608	0.010608	1.16893	1.83688	1.36	NA	NA	0.0010608	0.0010608	NA	NA	955
Fenu et al., 2020	10.1007/s11356-019-07047-7	Pilot	Non-aerated	Sequencing Batch Reactor (SBR)	SBR	2.5	Flocculent Sludge (FS)	FS	Aartselaar, Belgium	0.15	1.5	Anammox (AMX)	AMX	0	Domestic Wastewater	Intermittant Aeration	0.26	0.26	0.173333	0	0	32	141.714	0	0	1	3.28571	520	668.571	102	131.143	520	520	0.5775	0.7404	0.5775	0.08	0.000624	0.000624	0.0687603	0.108052	0.08	NA	NA	6.24e-05	6.24e-05	NA	NA	955
Fenu et al., 2020	10.1007/s11356-019-07047-8	Pilot	Single Stage	Sequencing Batch Reactor (SBR)	SBR	2.5	Flocculent Sludge (FS)	FS	Aartselaar, Belgium	0.15	1.5	Partial Nitrification / Anammox (PNA)	PNA	2.2	Domestic Wastewater	Intermittant Aeration	0.26	0.26	0.173333	0	0	32	141.714	0	0	1	3.28571	520	668.571	102	131.143	520	520	0.5775	0.7404	0.5775	1.44	0.011232	0.011232	1.23769	1.94494	1.44	NA	NA	0.0011232	0.0011232	NA	NA	955
Fenu et al., 2020	10.1007/s11356-019-07047-9	Pilot	Aerated	Sequencing Batch Reactor (SBR)	SBR	2.5	Flocculent Sludge (FS)	FS	Aartselaar, Belgium	0.15	1.5	Partial Nitrification (PN)	PN	3.43	Domestic Wastewater	Intermittant Aeration	0.26	0.26	0.173333	0	0	32	141.714	0	0	1	3.28571	520	668.571	102	131.143	520	520	0.5775	0.7404	0.5775	2.48	0.019344	0.019344	2.13157	3.34961	2.48	NA	NA	0.0019344	0.0019344	NA	NA	955
Fenu et al., 2020	10.1007/s11356-019-07047-10	Pilot	Non-aerated	Sequencing Batch Reactor (SBR)	SBR	2.5	Flocculent Sludge (FS)	FS	Aartselaar, Belgium	0.15	1.5	Anammox (AMX)	AMX	0	Domestic Wastewater	Intermittant Aeration	0.26	0.26	0.173333	0	0	32	141.714	0	0	1	3.28571	520	668.571	102	131.143	520	520	0.5775	0.7404	0.5775	0.08	0.000624	0.000624	0.0687603	0.108052	0.08	NA	NA	6.24e-05	6.24e-05	NA	NA	955
Fenu et al., 2020	10.1007/s11356-019-07047-11	Pilot	Single Stage	Sequencing Batch Reactor (SBR)	SBR	2.5	Flocculent Sludge (FS)	FS	Aartselaar, Belgium	0.15	1.5	Partial Nitrification / Anammox (PNA)	PNA	2.2	Domestic Wastewater	Intermittant Aeration	0.26	0.26	0.173333	0	0	32	141.714	0	0	1	3.28571	520	668.571	102	131.143	520	520	0.5775	0.7404	0.5775	3.34	0.026052	0.026052	2.87074	4.51117	3.34	NA	NA	0.0026052	0.0026052	NA	NA	955
Fenu et al., 2019	10.1016/j.bej.2019.107336	Pilot	Single Stage	Sequencing Batch Reactor (SBR)	SBR	2.5	Flocculent Sludge (FS)	FS	Aartselaar, Belgium	0.15	1.5	Anammox (AMX)	AMX	0	Reject Water	None	0.25-0.5 m3/d	0.235	0.156667	NA	NA	NA	NA	NA	NA	NA	NA	NA	NA	NA	NA	NA	NA	NA	0.7269	NA	NA	NA	NA	1.3	1.3	0.944935	NA	NA	NA	NA	NA	NA	NA
Han et al., 2019	10.1016/j.psep.2019.06.019	Lab	Single Stage	Sequencing Batch Reactor (SBR)	SBR	2.5	Flocculent Sludge (FS)	FS	Nanjing, China	0.6451	0.005	Simultaneous partial Nitrification, ANAMMOX and Denitrification (SNAD)	SNAD	2.2	Synthetic Wastewater	Intermittant Aeration	0.000854425	0.000854425	0.170885	0.54485	2.41291	0.201993	0.894542	0.0172391	0.0566428	0.0576618	0.18946	21.01	27.0129	8.72493	11.2178	35.6011	35.6011	15.5218	0.564	0.000100396	202.088819 10^-9 mol/mol	1.1e-08	1.1e-08	0.00696208	0.00696208	0.0158653	NA	NA	4.39e-07	4.39e-07	NA	NA	210
Han et al., 2019	10.1016/j.psep.2019.06.019	Lab	Single Stage	Sequencing Batch Reactor (SBR)	SBR	2.5	Flocculent Sludge (FS)	FS	Nanjing, China	0.6451	0.005	Simultaneous partial Nitrification, ANAMMOX and Denitrification (SNAD)	SNAD	2.2	Synthetic Wastewater	None	0.000871863	0.000871863	0.174373	0.390698	1.73023	8.38202	37.1204	0.0160502	0.0527364	0.318626	1.04691	19.4054	24.9499	4.56304	5.86676	36.3276	36.3276	20.4095	0.4382	7.96e-05	282.263	1.53e-08	1.53e-08	0.0122661	0.0122661	0.0217162	NA	NA	6.14e-07	6.14e-07	NA	NA	208
Bao et al., 2018	10.1016/j.chemosphere.2018.08.090	Lab	Single Stage	Sequencing Batch Reactor (SBR)	SBR	2.5	Flocculent Sludge (FS)	FS	Girona, Spain	0.14	0.008	Partial Nitrification (PN)	PN	3.43	Synthetic Wastewater	None	3.97e-05	0.000953642	0.119205	0	0	0	0	0	0	NA	NA	124.669	160.289	2.98013	3.8316	124.669	124.669	2.98013	0.9761	0.00097351	0.3	2.92e-06	2.92e-06	0.3	0.3	0.292829	NA	NA	1.45e-05	1.45e-05	NA	NA	NA
Bao et al., 2018	10.1016/j.chemosphere.2018.08.090	Lab	Single Stage	Sequencing Batch Reactor (SBR)	SBR	2.5	Flocculent Sludge (FS)	FS	Girona, Spain	0.14	0.008	Partial Nitrification (PN)	PN	3.43	Synthetic Wastewater	None	4.07e-05	0.000976439	0.122055	0	0	0	0	0	0	NA	NA	127.649	164.12	6.45695	8.3018	127.649	127.649	6.45695	0.9494	0.000969536	0.7	6.79e-06	6.79e-06	0.7	0.7	0.664591	NA	NA	3.38e-05	3.38e-05	NA	NA	NA
Bao et al., 2018	10.1016/j.chemosphere.2018.08.090	Lab	Single Stage	Sequencing Batch Reactor (SBR)	SBR	2.5	Flocculent Sludge (FS)	FS	Girona, Spain	0.14	0.008	Partial Nitrification (PN)	PN	3.43	Synthetic Wastewater	None	3.96e-05	0.000949843	0.11873	0	0	0	0	0	0	NA	NA	124.172	159.65	10.4305	13.4106	124.172	124.172	10.4305	0.916	0.000909934	0.62	5.64e-06	5.64e-06	0.62	0.62	0.56792	NA	NA	2.81e-05	2.81e-05	NA	NA	NA
Bao et al., 2018	10.1016/j.chemosphere.2018.08.090	Lab	Single Stage	Sequencing Batch Reactor (SBR)	SBR	2.5	Flocculent Sludge (FS)	FS	Girona, Spain	0.14	0.008	Partial Nitrification (PN)	PN	3.43	Synthetic Wastewater	None	4.45e-05	0.00106762	0.133453	0	0	0	0	0	0	NA	NA	139.57	179.447	18.3775	23.6282	139.57	139.57	18.3775	0.8683	0.000969536	0.43	4.17e-06	4.17e-06	0.43	0.43	0.373381	NA	NA	2.08e-05	2.08e-05	NA	NA	NA
Bao et al., 2018	10.1016/j.chemosphere.2018.08.090	Lab	Single Stage	Sequencing Batch Reactor (SBR)	SBR	2.5	Flocculent Sludge (FS)	FS	Girona, Spain	0.14	0.008	Partial Nitrification (PN)	PN	3.43	Synthetic Wastewater	None	3.25e-05	0.000780795	0.0975993	0	0	0	0	0	0	NA	NA	130.132	167.313	121.192	155.818	130.132	130.132	121.192	0.0687	7.15e-05	0.15	1.07e-07	1.07e-07	0.15	0.15	0.0103053	NA	NA	4.19e-07	4.19e-07	NA	NA	NA
Bao et al., 2018	10.1016/j.chemosphere.2018.08.090	Lab	Single Stage	Sequencing Batch Reactor (SBR)	SBR	2.5	Flocculent Sludge (FS)	FS	Girona, Spain	0.14	0.008	Partial Nitrification (PN)	PN	3.43	Synthetic Wastewater	None	3.63e-05	0.000870056	0.108757	0	0	0	0	0	0	NA	NA	113.742	146.239	3.47682	4.4702	113.742	113.742	3.47682	0.9694	0.000882119	0.14	1.23e-06	1.23e-06	0.14	0.14	0.135721	NA	NA	6.15e-06	6.15e-06	NA	NA	NA
Bao et al., 2018	10.1016/j.chemosphere.2018.08.090	Lab	Single Stage	Sequencing Batch Reactor (SBR)	SBR	2.5	Flocculent Sludge (FS)	FS	Girona, Spain	0.14	0.008	Partial Nitrification (PN)	PN	3.43	Synthetic Wastewater	None	4.21e-05	0.00101063	0.126329	0	0	0	0	0	0	NA	NA	132.119	169.868	5.46358	7.0246	132.119	132.119	5.46358	0.9586	0.00101325	0.15	1.52e-06	1.52e-06	0.15	0.15	0.143797	NA	NA	7.57e-06	7.57e-06	NA	NA	NA
Bao et al., 2018	10.1016/j.chemosphere.2018.08.090	Lab	Single Stage	Sequencing Batch Reactor (SBR)	SBR	2.5	Flocculent Sludge (FS)	FS	Girona, Spain	0.14	0.008	Partial Nitrification (PN)	PN	3.43	Synthetic Wastewater	None	3.7e-05	0.000889053	0.111132	0	0	0	0	0	0	NA	NA	116.225	149.432	13.9073	17.8808	116.225	116.225	13.9073	0.8803	0.000818543	0.15	1.23e-06	1.23e-06	0.15	0.15	0.132051	NA	NA	6.11e-06	6.11e-06	NA	NA	NA
Bao et al., 2018	10.1016/j.chemosphere.2018.08.090	Lab	Single Stage	Sequencing Batch Reactor (SBR)	SBR	2.5	Flocculent Sludge (FS)	FS	Girona, Spain	0.14	0.008	Partial Nitrification (PN)	PN	3.43	Synthetic Wastewater	None	4.26e-05	0.00102203	0.127754	0	0	0	0	0	0	NA	NA	133.609	171.783	23.3444	30.0142	133.609	133.609	23.3444	0.8253	0.000882119	0.14	1.23e-06	1.23e-06	0.14	0.14	0.115539	NA	NA	6.15e-06	6.15e-06	NA	NA	NA
Li et al., 2022	10.3390/w14203195	Lab	Single Stage	Sequencing Batch Reactor (SBR)	SBR	2.5	Flocculent Sludge (FS)	FS	Beijing, China	0.558	0.012	Partial Nitrification (PN)	PN	3.43	Domestic Wastewater	None	5.14e-05	0.00123429	0.102857	0	0	0	0	0	0	19.3393	63.5435	30	38.5714	0.945946	1.21622	30	30	20.2853	0.9595	0.000116577	0.16 mgN/(MLSS L h)	NA	NA	NA	0.963721	0.933333	NA	NA	4e-05	4e-05	303	NA	182
Li et al., 2022	10.3390/w14203195	Lab	Single Stage	Sequencing Batch Reactor (SBR)	SBR	2.5	Flocculent Sludge (FS)	FS	Beijing, China	0.558	0.012	Partial Nitrification (PN)	PN	3.43	Domestic Wastewater	None	5.14e-05	0.00123429	0.102857	0	0	0	0	10	32.8571	13.2432	43.5135	20	25.7143	0	0	30	30	13.2432	1	0.000201081	0.3	3.6e-06	3.6e-06	1.1393	1.75	1.75	NA	NA	7.5e-05	7.5e-05	303	NA	182
Li et al., 2022	10.3390/w14203195	Lab	Single Stage	Sequencing Batch Reactor (SBR)	SBR	2.5	Flocculent Sludge (FS)	FS	Beijing, China	0.558	0.012	Partial Nitrification (PN)	PN	3.43	Domestic Wastewater	None	5.14e-05	0.00123429	0.102857	0	0	0	0	20	65.7143	22.659	74.4509	10	12.8571	0.101156	0.130058	30	30	22.7601	0.987	8.69e-05	0.49	5.88e-06	5.88e-06	4.30695	2.88754	2.85833	NA	NA	0.0001225	0.0001225	303	NA	182
Jia et al., 2018	10.1039/c8ew00125a	Lab	Single Stage	Sequencing Batch Reactor (SBR)	SBR	2.5	Flocculent Sludge (FS)	FS	Xuzhou, China	0.6451	0.06	Partial Nitrification (PN)	PN	3.43	Synthetic Wastewater	None	0.0005657	0.0135768	0.22628	0.05	0.221429	8.87	39.2814	0.11	0.361429	50.88	167.177	112.98	145.26	0.89	1.14429	113.14	113.14	0.464	0.464	3.14982	10.06 mg/gMLSS per cycle	0.0018108	0.0018108	0.0365839	36.5839	16.9749	NA	NA	0.002515	0.002515	NA	NA	384.83
Jia et al., 2018	10.1039/c8ew00125a	Lab	Single Stage	Sequencing Batch Reactor (SBR)	SBR	2.5	Flocculent Sludge (FS)	FS	Xuzhou, China	0.6451	0.06	Partial Nitrification (PN)	PN	3.43	Synthetic Wastewater	None	0.00056105	0.0134652	0.22442	0.05	0.221429	35.36	156.594	0.07	0.23	25.48	83.72	112.09	144.116	1.41	1.81286	112.21	112.21	0.4452	0.4452	2.99735	6.93	0.0012474	0.0012474	0.0264834	26.4834	11.7904	NA	NA	0.0017325	0.0017325	NA	NA	381.15
Jia et al., 2018	10.1039/c8ew00125a	Lab	Single Stage	Sequencing Batch Reactor (SBR)	SBR	2.5	Flocculent Sludge (FS)	FS	Xuzhou, China	0.6451	0.06	Partial Nitrification (PN)	PN	3.43	Synthetic Wastewater	None	0.0005478	0.0131472	0.21912	0.07	0.31	43.84	194.149	0.14	0.46	5.56	18.2686	109.35	140.593	14.38	18.4886	109.56	109.56	0.6578	0.6578	4.32411	3.98	0.0007164	0.0007164	0.010543	10.543	6.93518	NA	NA	0.000995	0.000995	NA	NA	391.02
Milia et al., 2018	10.5004/dwt.2018.22934	Lab	Single Stage	Completely Stirred Tank Reactor (CSTR)	CSTR	2.5	Flocculent Sludge (FS)	FS	Cagliari, Italy	0.25	0.02	Partial Nitrification (PN)	PN	3.43	Synthetic Wastewater	None	1.5 gN/Ld	0.03	1.5	0	0	12	53.1429	0	0	749	2461	1522	1956.86	806	1036.29	1522	1522	1567	0.4704	0.0009	2.52 mgN/L/d	5e-05	7.86e-05	0.36	0.765251	0.36	NA	NA	0.000165	0.000165	NA	NA	NA
Milia et al., 2018	10.5004/dwt.2018.22934	Lab	Single Stage	Completely Stirred Tank Reactor (CSTR)	CSTR	2.5	Flocculent Sludge (FS)	FS	Cagliari, Italy	0.25	0.02	Partial Nitrification (PN)	PN	3.43	Synthetic Wastewater	None	1.5 gN/Ld	0.03	1.5	0	0	12	53.1429	0	0	707	2323	1536	1974.86	819	1053	1536	1536	1538	0.4668	4e-05	2.67556	5.31e-05	8.34e-05	0.373043	0.799156	0.373043	NA	NA	0.000175185	0.000175185	NA	NA	NA
Milia et al., 2018	10.5004/dwt.2018.22934	Lab	Single Stage	Completely Stirred Tank Reactor (CSTR)	CSTR	2.5	Flocculent Sludge (FS)	FS	Cagliari, Italy	0.25	0.02	Partial Nitrification (PN)	PN	3.43	Synthetic Wastewater	None	1.5 gN/Ld	0.03	1.5	0	0	9	39.8571	0	0	709	2329.57	1490	1915.71	789	1014.43	1490	1490	1507	0.4705	0.00034	2.44222	4.85e-05	7.61e-05	0.328696	0.698654	0.328696	NA	NA	0.000159907	0.000159907	NA	NA	NA
Milia et al., 2018	10.5004/dwt.2018.22934	Lab	Single Stage	Completely Stirred Tank Reactor (CSTR)	CSTR	2.5	Flocculent Sludge (FS)	FS	Cagliari, Italy	0.25	0.02	Partial Nitrification (PN)	PN	3.43	Synthetic Wastewater	None	1.5 gN/Ld	0.03	1.5	0	0	2	8.85714	0	0	902	2963.71	1482	1905.43	580	745.714	1482	1482	1484	0.6086	4e-05	2.27111	4.51e-05	7.08e-05	0.233478	0.383608	0.233478	NA	NA	0.000148704	0.000148704	NA	NA	NA
Milia et al., 2018	10.5004/dwt.2018.22934	Lab	Single Stage	Completely Stirred Tank Reactor (CSTR)	CSTR	2.5	Flocculent Sludge (FS)	FS	Cagliari, Italy	0.25	0.02	Partial Nitrification (PN)	PN	3.43	Synthetic Wastewater	None	1.5 gN/Ld	0.03	1.5	0	0	4	17.7143	0	0	953	3131.29	1535	1973.57	598	768.857	1535	1535	1555	0.6104	0.0004	2.08444	4.14e-05	6.5e-05	0.223043	0.365391	0.223043	NA	NA	0.000136481	0.000136481	NA	NA	NA
Milia et al., 2018	10.5004/dwt.2018.22934	Lab	Single Stage	Completely Stirred Tank Reactor (CSTR)	CSTR	2.5	Flocculent Sludge (FS)	FS	Cagliari, Italy	0.25	0.02	Partial Nitrification (PN)	PN	3.43	Synthetic Wastewater	None	1.5 gN/Ld	0.03	1.5	0	0	5.39568	23.8952	0	0	399.281	1311.92	1467.63	1886.95	1084.53	1394.4	1467.63	1467.63	1489.21	0.261	0.000431655	4.58889	9.1e-05	0.000143078	0.610435	2.33857	0.610435	NA	NA	0.000300463	0.000300463	NA	NA	NA
Peng et al., 2023	10.1016/j.biortech.2022.128564	Lab	Single Stage	Sequencing Batch Reactor (SBR)	SBR	2.5	Flocculent Sludge (FS)	FS	Wuhan, China	0.4364	0.04	Partial Nitrification (PN)	PN	3.43	Synthetic Wastewater	None	0.0025	0.06	1.5	0	0	149.353	661.42	0	0	684.543	2249.21	1500	1928.57	620.745	798.101	1500	1500	1454.64	0.5862	0.00181437	1.5	0.000527553	0.000527553	1.5	2.55899	1.5	NA	NA	0.000549534	0.000549534	NA	NA	NA
Peng et al., 2023	10.1016/j.biortech.2022.128564	Lab	Single Stage	Sequencing Batch Reactor (SBR)	SBR	2.5	Flocculent Sludge (FS)	FS	Wuhan, China	0.4364	0.04	Partial Nitrification (PN)	PN	3.43	Synthetic Wastewater	None	0.0025	0.06	1.5	0	0	174.063	770.851	0	0	723.43	2376.99	1500	1928.57	493.051	633.922	1500	1500	1390.54	0.6713	0.00437824	1.50896	0.000607777	0.000607777	1.50896	2.24781	1.50896	NA	NA	0.000633101	0.000633101	NA	NA	NA
Peng et al., 2023	10.1016/j.biortech.2022.128565	Lab	Single Stage	Sequencing Batch Reactor (SBR)	SBR	2.5	Flocculent Sludge (FS)	FS	Wuhan, China	0.4364	0.04	Partial Nitrification (PN)	PN	3.43	Synthetic Wastewater	None	0.0025	0.06	1.5	0	0	262.571	1162.81	0	0	755.209	2481.4	1500	1928.57	400.799	515.313	1500	1500	1418.58	0.7328	0.00325683	1.49104	0.000655583	0.000655583	1.49104	2.03472	1.49104	NA	NA	0.000682899	0.000682899	NA	NA	NA
Peng et al., 2023	10.1016/j.biortech.2022.128566	Lab	Single Stage	Sequencing Batch Reactor (SBR)	SBR	2.5	Flocculent Sludge (FS)	FS	Wuhan, China	0.4364	0.04	Partial Nitrification (PN)	PN	3.43	Synthetic Wastewater	None	0.0025	0.06	1.5	0	0	177.408	785.664	0	0	659.42	2166.67	1500	1928.57	453.85	583.522	1500	1500	1290.68	0.6974	0.00837286	2.03284	0.00085066	0.00085066	2.03284	2.91474	2.03284	NA	NA	0.000886104	0.000886104	NA	NA	NA
Peng et al., 2023	10.1016/j.biortech.2022.128567	Lab	Single Stage	Sequencing Batch Reactor (SBR)	SBR	2.5	Flocculent Sludge (FS)	FS	Wuhan, China	0.4364	0.04	Partial Nitrification (PN)	PN	3.43	Synthetic Wastewater	None	0.0025	0.06	1.5	0	0	223.391	989.302	0	0	620.353	2038.3	1500	1928.57	552.991	710.989	1500	1500	1396.73	0.6313	0.0041306	2.39552	0.000907432	0.000907432	2.39552	3.79435	2.39552	NA	NA	0.000945242	0.000945242	NA	NA	NA
Miao et al., 2020	10.1080/09593330.2018.1551432	Lab	Single Stage	Sequencing Batch Reactor (SBR)	SBR	2.5	Flocculent Sludge (FS)	FS	Shenzhen, China	0.4715	0.06	Partial Nitrification (PN)	PN	3.43	Synthetic Wastewater	None	0.00437481	0.104995	1.74992	NA	NA	NA	NA	276.352	908.015	559.196	1837.36	306.955	394.657	0	0	583.308	583.308	559.196	1	0.00144668	1.61217	2.42e-06	2.42e-06	0.106374	0.88	0.88	NA	NA	5.04e-06	5.04e-06	NA	NA	1166.62
Du et al., 2016	10.1016/j.biortech.2015.12.044	Lab	Single Stage	Sequencing Batch Reactor (SBR)	SBR	2.5	Flocculent Sludge (FS)	FS	Beijing, China	0.5688	0.05	Partial Denitrification (PD)	PD	0	Synthetic Wastewater	None	5.53e-05	0.0013283	0.026566	20.4009	90.347	0	0	0.353774	1.1624	18.5142	60.8322	NA	NA	NA	NA	20.7547	20.7547	18.5142	1	18.5142	5.90909091 *10^-3 mg/L	NA	NA	NA	2.96982	2.96982	NA	NA	1.2398	5.17e-05	NA	NA	62.1818
Du et al., 2016	10.1016/j.biortech.2015.12.044	Lab	Single Stage	Sequencing Batch Reactor (SBR)	SBR	2.5	Flocculent Sludge (FS)	FS	Beijing, China	0.5688	0.05	Partial Denitrification (PD)	PD	0	Synthetic Wastewater	None	0.000226977	0.00544744	0.108949	84.186	372.824	0.465116	2.0598	0.930233	3.05648	73.9535	242.99	NA	NA	NA	NA	85.1163	85.1163	74.4186	0.9945	74.4186	9.18246	4.59e-07	4.59e-07	3.93e-07	1.33114	1.32379	NA	NA	2.26639	9.44e-05	NA	NA	256.364
Du et al., 2016	10.1016/j.biortech.2015.12.044	Lab	Single Stage	Sequencing Batch Reactor (SBR)	SBR	2.5	Flocculent Sludge (FS)	FS	Beijing, China	0.5688	0.05	Partial Denitrification (PD)	PD	0	Synthetic Wastewater	None	5.44e-05	0.00130566	0.0261132	20.0472	88.7803	0	0	0.353774	1.1624	9.55189	31.3848	NA	NA	NA	NA	20.4009	20.4009	9.55189	1	9.55189	9.34552	4.67e-07	4.67e-07	3.11e-06	5.64734	5.64734	NA	NA	2.31739	9.66e-05	NA	NA	85.4545
Du et al., 2016	10.1016/j.biortech.2015.12.044	Lab	Single Stage	Sequencing Batch Reactor (SBR)	SBR	2.5	Flocculent Sludge (FS)	FS	Beijing, China	0.5688	0.05	Partial Denitrification (PD)	PD	0	Synthetic Wastewater	None	0.000229457	0.00550698	0.11014	84.6512	374.884	0	0	1.39535	4.58472	49.3023	161.993	NA	NA	NA	NA	86.0465	86.0465	49.3023	1	49.3023	10.3479	5.17e-07	5.17e-07	6.68e-07	1.52007	1.52007	NA	NA	2.63088	0.00010962	NA	NA	338.182
Du et al., 2016	10.1016/j.biortech.2015.12.044	Lab	Single Stage	Sequencing Batch Reactor (SBR)	SBR	2.5	Flocculent Sludge (FS)	FS	Beijing, China	0.5688	0.05	Partial Denitrification (PD)	PD	0	Synthetic Wastewater	None	5.34e-05	0.00128152	0.0256303	20.0237	88.6764	0.118483	0.524712	0	0	0.236967	0.778605	NA	NA	NA	NA	20.0237	20.0237	0.35545	0.9941	0.35545	8.05687	4.03e-07	4.03e-07	7.21e-05	4.78138	4.75308	NA	NA	1.91436	7.98e-05	NA	NA	173.636
Du et al., 2016	10.1016/j.biortech.2015.12.044	Lab	Single Stage	Sequencing Batch Reactor (SBR)	SBR	2.5	Flocculent Sludge (FS)	FS	Beijing, China	0.5688	0.05	Partial Denitrification (PD)	PD	0	Synthetic Wastewater	None	0.000222222	0.00533333	0.106667	81.9444	362.897	0	0	1.38889	4.56349	1.38889	4.56349	NA	NA	NA	NA	83.3333	83.3333	1.38889	1	1.38889	32.1127	1.61e-06	1.61e-06	7.36e-05	5.63053	5.63053	NA	NA	9.43784	0.000393243	NA	NA	690.909
Ahn et al., 2011	10.1021/es103534g	Lab	Single Stage	Completely Stirred Tank Reactor (CSTR)	CSTR	2.5	Flocculent Sludge (FS)	FS	New York, US	0.189189	0.011	Partial Nitrification (PN)	PN	3.43	Synthetic Wastewater	None	0.000208333	0.005	0.454545	0	0	NA	NA	0	0	92.2849	1268.67	500	642.857	83.6795	104.917	500	500	467.72	0.8326	0.00355079	1.78674	8.22e-05	8.22e-05	1.49514	2.14588	1.78674	NA	NA	0.00028317	0.00028317	NA	NA	NA
Ahn et al., 2011	10.1021/es103534g	Lab	Single Stage	Completely Stirred Tank Reactor (CSTR)	CSTR	2.5	Flocculent Sludge (FS)	FS	New York, US	0.189189	0.011	Partial Nitrification (PN)	PN	3.43	Synthetic Wastewater	None	0.000208333	0.005	0.454545	0	0	NA	NA	0	0	92.2849	1183.19	500	642.857	78.0415	141.162	500	500	469.895	0.8439	0.00331155	0.720461	3.09e-05	3.09e-05	0.562259	0.853711	0.720461	NA	NA	0.000106488	0.000106488	NA	NA	NA
Ahn et al., 2011	10.1021/es103534g	Lab	Single Stage	Completely Stirred Tank Reactor (CSTR)	CSTR	2.5	Flocculent Sludge (FS)	FS	New York, US	0.189189	0.011	Partial Nitrification (PN)	PN	3.43	Synthetic Wastewater	None	0.000208333	0.005	0.454545	0	0	NA	NA	0	0	95.2522	1393.05	500	642.857	89.0208	70.5808	500	500	478.867	0.822	0.00232458	0.489914	2.4e-05	2.4e-05	0.436125	0.596032	0.489914	NA	NA	8.26e-05	8.26e-05	NA	NA	NA
Ahn et al., 2011	10.1021/es103534g	Lab	Single Stage	Completely Stirred Tank Reactor (CSTR)	CSTR	2.5	Flocculent Sludge (FS)	FS	New York, US	0.189189	0.011	Partial Nitrification (PN)	PN	3.43	Synthetic Wastewater	None	0.000208333	0.005	0.454545	0	0	NA	NA	0	0	93.7685	1225.07	500	642.857	79.5252	131.624	500	500	475.222	0.8409	0.00272557	0.74928	3.28e-05	3.28e-05	0.595866	0.890992	0.74928	NA	NA	0.000112853	0.000112853	NA	NA	NA
Shi et al., 2011	10.1016/j.biortech.2010.11.081	Lab	Single Stage	Sequencing Batch Reactor (SBR)	SBR	2.5	Granular Sludge (GS)	GS	Jinan, China	0.6838	0.035	Partial Nitrification (PN)	PN	3.43	Synthetic Wastewater	Granular Sludge	0.000665179	0.0159643	0.456122	0	0	5.24476	6.74326	0	0	65.5594	215.41	152.041	195.481	1.02041	1.31195	152.041	152.041	139.796	0.9933	0.00428571	56.1189	0.00049104	0.00049104	7.2912	11.3506	11.2745	NA	NA	0.00336713	0.00336713	NA	NA	171.242
Law et al., 2011	10.1016/j.watres.2011.08.055	Lab	Single Stage	Sequencing Batch Reactor (SBR)	SBR	2.5	Flocculent Sludge (FS)	FS	Brisbane, Australia	0.81	0.008	Partial Nitrification (PN)	PN	3.43	Synthetic Wastewater	None	0.064	0.064	8	3.87033	17.14	5.08573	22.5225	433.352	1423.87	519.372	1706.51	522.709	672.054	433.653	557.554	959.931	959.931	958.111	0.1704	1.46e-05	1.88623	1.89e-06	2.96e-06	12.9538	0.234843	0.0400109	NA	NA	0.000209581	0.000209581	NA	NA	NA
Law et al., 2011	10.1016/j.watres.2011.08.055	Lab	Single Stage	Sequencing Batch Reactor (SBR)	SBR	2.5	Flocculent Sludge (FS)	FS	Brisbane, Australia	0.81	0.008	Partial Nitrification (PN)	PN	3.43	Synthetic Wastewater	None	0.064	0.064	8	9.21455	40.8073	10.4845	46.4314	445.081	1462.41	524.773	1724.25	518.03	666.038	431.762	555.122	972.326	972.326	967.019	0.1665	4.25e-05	1.47305	1.47e-06	2.31e-06	3.47007	0.187633	0.0312466	NA	NA	0.000163673	0.000163673	NA	NA	NA
Zhang et al., 2016	10.1016/j.biortech.2016.09.129	Lab	Single Stage	Attached-Film Expanded Bed (AFEB)	AFEB	1.2	Biofilm (BF)	BF	Sendai, Japan	0.516	0.005	Anammox (AMX)	AMX	0	Synthetic Wastewater	None	5 gN/L/d	0.025	5	83.004	367.589	45.9854	203.65	71.1462	233.766	10.9489	35.975	302.372	388.763	30.6569	39.4161	313	313	85.6361	0.8564	0.0013402	0.035131	6.34e-07	6.34e-07	0.0300848	0.0410236	0.035131	NA	NA	8.45e-05	8.45e-05	NA	NA	NA
Zhang et al., 2016	10.1016/j.biortech.2016.09.129	Lab	Single Stage	Attached-Film Expanded Bed (AFEB)	AFEB	1.2	Biofilm (BF)	BF	Sendai, Japan	0.516	0.005	Anammox (AMX)	AMX	0	Synthetic Wastewater	None	5	0.025	5	94.8617	420.102	85.4015	378.206	71.1462	233.766	6.56934	21.585	415.02	533.597	13.1387	16.8926	625	625	88.0995	0.881	0.00275311	0.0684129	2.61e-06	2.61e-06	0.0602715	0.0776541	0.0684129	NA	NA	0.000173836	0.000173836	NA	NA	NA
Zhang et al., 2016	10.1016/j.biortech.2016.09.129	Lab	Single Stage	Attached-Film Expanded Bed (AFEB)	AFEB	1.2	Biofilm (BF)	BF	Sendai, Japan	0.516	0.005	Anammox (AMX)	AMX	0	Synthetic Wastewater	None	5	0.025	5	130.435	577.64	100.73	446.09	88.9328	292.208	37.2263	122.315	758.893	975.72	8.75912	11.2617	1250	1250	90.0404	0.9004	0.00562753	0.27735	2.21e-05	2.21e-05	0.249727	0.308028	0.27735	NA	NA	0.000736133	0.000736133	NA	NA	NA
Zhang et al., 2016	10.1016/j.biortech.2016.09.129	Lab	Single Stage	Attached-Film Expanded Bed (AFEB)	AFEB	1.2	Biofilm (BF)	BF	Sendai, Japan	0.516	0.005	Anammox (AMX)	AMX	0	Synthetic Wastewater	None	5	0.025	5	213.439	945.229	186.131	824.296	219.368	720.779	127.007	417.31	1417	1821.85	19.708	25.3389	2500	2500	86.8865	0.8689	0.0108608	0.86718	0.000128593	0.000128593	0.753462	0.998061	0.86718	NA	NA	0.00214322	0.00214322	NA	NA	NA
Li et al., 2017	10.1038/srep42072	Lab	Single Stage	Sequencing Batch Biofilm Reactor (SBBR)	SBBR	2.5	Biofilm (BF)	BF	Chongqing, China	0.4743	0.03	Partial Nitrification / Anammox (PNA)	PNA	2.2	Synthetic Wastewater	None	0.0015198	0.0015198	0.0506601	9.57096	42.3857	30.363	134.465	0.819398	2.69231	0.698997	2.2967	89.1089	114.569	0	0	101.32	101.32	31.3531	0.6906	0.00209901	30.7368	3.07e-05	3.07e-05	0.931859	1.86372	1.287	NA	NA	4.27e-05	4.27e-05	NA	NA	NA
Ma et al., 2022	10.1016/j.cej.2021.133630	Lab	Single Stage	Membrane Aerated Biofilm Reactor (MABR)	MABR	6	Biofilm (BF)	BF	Lyngby, Denmark	0.076	0.0008	Partial Nitrification / Anammox (PNA)	PNA	2.2	Synthetic Wastewater	None	9.1 gN/m3/d	7.28e-06	0.0091	0	0	15.6584	69.3442	0	0	5.97865	19.6441	74.5907	95.9024	49.8221	64.0569	74.5907	74.5907	71.4591	0.042	2.51e-06	2.35 % load	1.4e-06	2.2e-06	55.9727	55.9727	2.35	NA	NA	1.39e-05	1.39e-05	NA	NA	NA
Ma et al., 2022	10.1016/j.cej.2021.133630	Lab	Single Stage	Membrane Aerated Biofilm Reactor (MABR)	MABR	6	Biofilm (BF)	BF	Lyngby, Denmark	0.076	0.0008	Partial Nitrification / Anammox (PNA)	PNA	2.2	Synthetic Wastewater	Intermittent Areation	9.1	7.28e-06	0.0091	0	0	9.67972	42.8673	0	0	0.854093	2.8063	74.8754	96.2684	48.968	62.9588	74.8754	74.8754	59.5018	0.2053	1.23e-05	0.3	1.8e-07	2.82e-07	1.46111	1.46111	0.3	NA	NA	1.78e-06	1.78e-06	NA	NA	NA
Ma et al., 2022	10.1016/j.cej.2021.133630	Lab	Single Stage	Membrane Aerated Biofilm Reactor (MABR)	MABR	6	Biofilm (BF)	BF	Lyngby, Denmark	0.076	0.0008	Partial Nitrification / Anammox (PNA)	PNA	2.2	Synthetic Wastewater	None	9.1	7.28e-06	0.0091	0	0	15.089	66.8226	0	0	0	0	71.7438	92.242	36.4413	46.8531	71.7438	71.7438	51.5302	0.2817	1.62e-05	0.35	2.01e-07	3.16e-07	1.24225	1.24225	0.35	NA	NA	1.99e-06	1.99e-06	NA	NA	NA
Ma et al., 2022	10.1016/j.cej.2021.133630	Lab	Single Stage	Membrane Aerated Biofilm Reactor (MABR)	MABR	6	Biofilm (BF)	BF	Lyngby, Denmark	0.076	0.0008	Partial Nitrification / Anammox (PNA)	PNA	2.2	Synthetic Wastewater	Intermittent Areation	9.1	7.28e-06	0.0091	0	0	8.54093	37.8241	0	0	0	0	74.5907	95.9024	50.1068	64.423	74.5907	74.5907	58.6477	0.2137	1.28e-05	0.18	1.07e-07	1.69e-07	0.842143	0.842143	0.18	NA	NA	1.07e-06	1.07e-06	NA	NA	NA
Ma et al., 2022	10.1016/j.cej.2021.133630	Lab	Single Stage	Membrane Aerated Biofilm Reactor (MABR)	MABR	6	Biofilm (BF)	BF	Lyngby, Denmark	0.076	0.0008	Partial Nitrification / Anammox (PNA)	PNA	2.2	Synthetic Wastewater	Intermittent Areation	9.1	7.28e-06	0.0091	0	0	11.9573	52.9537	0	0	0.569395	1.87087	75.1601	96.6345	45.8363	58.9324	75.1601	75.1601	58.363	0.2235	1.34e-05	0.05 mgN/d offgas	4.12e-07	6.48e-07	3.06665	3.0732	0.686813	NA	NA	4.09e-06	4.09e-06	NA	NA	NA
Ma et al., 2022	10.1016/j.cej.2021.133630	Lab	Single Stage	Membrane Aerated Biofilm Reactor (MABR)	MABR	6	Biofilm (BF)	BF	Lyngby, Denmark	0.076	0.0008	Partial Nitrification / Anammox (PNA)	PNA	2.2	Synthetic Wastewater	None	9.1	7.28e-06	0.0091	0	0	22.0612	97.6995	0	0	0	0	73.7766	94.8556	41.1303	52.8818	73.7766	73.7766	63.1915	0.1435	8.47e-06	0.37% load	2.18e-07	3.43e-07	2.57884	2.57884	0.37	NA	NA	2.17e-06	2.17e-06	NA	NA	NA
Ma et al., 2015	10.1016/j.watres.2014.12.006	Lab	Single Stage	Moving Bed Biofilm Reactor (MBBR)	MBBR	2.5	Biofilm (BF)	BF	New York, US	0.189189	0.006	Partial Nitrification / Anammox (PNA)	PNA	2.2	Synthetic Wastewater	None	0.32	0.00192	0.32	0	0	91.7	406.1	0	0	4.4	14.4571	502.8	646.457	12.3	15.8143	502.8	502.8	108.4	0.7844	0.0023664	4.6179402 gN/m3/d	4.16e-05	6.53e-05	1.7563	1.83974	1.44311	NA	NA	0.000192414	0.000192414	NA	NA	48
Ma et al., 2015	10.1016/j.watres.2014.12.006	Lab	Single Stage	Moving Bed Biofilm Reactor (MBBR)	MBBR	2.5	Biofilm (BF)	BF	New York, US	0.189189	0.006	Partial Nitrification / Anammox (PNA)	PNA	2.2	Synthetic Wastewater	350% Inorganic Carbon demand	0.32	0.00192	0.32	0	0	137.1	607.157	0	0	76.8	252.343	480.9	618.3	67.2	86.4	480.9	480.9	281.1	0.4155	0.0011988	5.13621	4.62e-05	7.26e-05	3.85602	3.86325	1.60507	NA	NA	0.000214009	0.000214009	NA	NA	50.6
Ma et al., 2015	10.1016/j.watres.2014.12.006	Lab	Single Stage	Moving Bed Biofilm Reactor (MBBR)	MBBR	2.5	Biofilm (BF)	BF	New York, US	0.189189	0.006	Partial Nitrification / Anammox (PNA)	PNA	2.2	Synthetic Wastewater	None	0.32	0.00192	0.32	0	0	133.3	590.329	0	0	6	19.7143	492.7	633.471	2.9	3.72857	492.7	492.7	142.2	0.7114	0.002103	1.00434	9.04e-06	1.42e-05	0.429819	0.441192	0.313858	NA	NA	4.18e-05	4.18e-05	NA	NA	114.8
Okabe et al., 2011	10.1016/j.watres.2011.09.040	Lab	Aerated	Moving Bed Biofilm Reactor (MBBR)	MBBR	2.5	Biofilm (BF)	BF	Hokkaido, Japan	0.51	0.0008	Partial Nitrification (PN)	PN	3.43	Synthetic Wastewater	None	414.634146 mL/h	0.00307898	3.84873	0	0	2.78746	12.3444	0	0	140.767	462.519	309.408	397.81	218.815	281.334	309.408	309.408	362.369	0.2928	7.25e-05	0.12307692 kg/m3/d	1.64e-05	1.64e-05	14.4092	6.94597	2.03373	NA	NA	0.005125	0.005125	NA	NA	NA
Okabe et al., 2011	10.1016/j.watres.2011.09.040	Lab	Aerated	Moving Bed Biofilm Reactor (MBBR)	MBBR	2.5	Biofilm (BF)	BF	Hokkaido, Japan	0.51	0.0008	Partial Nitrification (PN)	PN	3.43	Synthetic Wastewater	None	163.415	0.00120802	1.51002	0	0	0	0	0	0	178.397	586.162	308.014	396.018	143.554	184.569	308.014	308.014	321.951	0.5339	0.000131568	0.0811189	1.08e-05	1.08e-05	5.23138	6.40258	3.41857	NA	NA	0.00337995	0.00337995	NA	NA	NA
Okabe et al., 2011	10.1016/j.watres.2011.09.040	Lab	Aerated	Moving Bed Biofilm Reactor (MBBR)	MBBR	2.5	Biofilm (BF)	BF	Hokkaido, Japan	0.51	0.0008	Partial Nitrification (PN)	PN	3.43	Synthetic Wastewater	None	229.268	0.00179452	2.24315	0	0	2.78746	12.3444	0	0	177.003	581.583	326.132	419.313	151.916	195.321	326.132	326.132	331.707	0.5342	0.000139373	0.0909091	1.21e-05	1.21e-05	5.53444	4.82791	2.57901	NA	NA	0.00378788	0.00378788	NA	NA	NA
Okabe et al., 2011	10.1016/j.watres.2011.09.040	Lab	Aerated	Moving Bed Biofilm Reactor (MBBR)	MBBR	2.5	Biofilm (BF)	BF	Hokkaido, Japan	0.51	0.0008	Partial Nitrification (PN)	PN	3.43	Synthetic Wastewater	None	196.341	0.00312984	3.9123	0	0	1.8583	8.22963	0	0	165.389	543.421	314.518	404.38	171.429	220.408	314.518	314.518	338.676	0.4549	0.000114472	0.12307692 kg/m3/d	1.64e-05	1.64e-05	9.1227	9.6	4	NA	NA	0.005125	0.005125	NA	NA	NA
Okabe et al., 2011	10.1016/j.watres.2011.09.040	Lab	Non-aerated	Moving Bed Biofilm Reactor (MBBR)	MBBR	2.5	Biofilm (BF)	BF	Hokkaido, Japan	0.51	0.00015	Anammox (AMX)	AMX	0	Synthetic Wastewater	None	462.046	0.0039617	26.4114	7.42574	32.8854	20.4918	90.7494	142.739	469	5.7377	18.8525	207.096	266.266	113.115	145.433	357.261	357.261	139.344	0.61	3.27e-05	13.2013201 uM liquid, 517.49 ppm gas	7.14e-06	7.14e-06	13.9077	NA	NA	13.9077	13.9077	2899.69	0.189861	NA	NA	NA
Okabe et al., 2011	10.1016/j.watres.2011.09.040	Lab	Non-aerated	Moving Bed Biofilm Reactor (MBBR)	MBBR	2.5	Biofilm (BF)	BF	Hokkaido, Japan	0.51	0.00015	Anammox (AMX)	AMX	0	Synthetic Wastewater	None	207.921	0.00163866	10.9244	24.7525	109.618	40.1639	177.869	158.416	520.509	71.3115	234.309	145.215	186.704	75.4098	96.9555	328.383	328.383	186.885	0.4309	2.12e-05	4.62046205, 216.50165	2.98e-06	2.98e-06	8.94309	NA	NA	8.94309	8.94309	1213.13	1213.13	NA	NA	NA
Okabe et al., 2011	10.1016/j.watres.2011.09.040	Lab	Non-aerated	Moving Bed Biofilm Reactor (MBBR)	MBBR	2.5	Biofilm (BF)	BF	Hokkaido, Japan	0.51	0.00015	Anammox (AMX)	AMX	0	Synthetic Wastewater	None	237.624	0.0016516	11.0107	0.825083	3.65394	22.9508	101.639	137.789	452.735	1.63934	5.38642	150.99	194.13	14.7541	18.9696	289.604	289.604	39.3443	0.8641	3.75e-05	2.64026403, 126.732673	1.75e-06	1.75e-06	2.95915	NA	NA	2.95915	2.95915	710.115	710.115	NA	NA	NA
Okabe et al., 2011	10.1016/j.watres.2011.09.040	Lab	Non-aerated	Moving Bed Biofilm Reactor (MBBR)	MBBR	2.5	Biofilm (BF)	BF	Hokkaido, Japan	0.51	0.00015	Anammox (AMX)	AMX	0	Synthetic Wastewater	None	302.53	0.00236033	15.7356	11.0011	48.7192	27.8689	123.419	146.315	480.748	26.2295	86.1827	167.767	215.7	67.7596	87.1194	325.083	325.083	121.858	0.6251	3.05e-05	2.64026403, 126.732673	1.75e-06	1.75e-06	3.64403	0.14	0.1	3.64403	3.64403	710.115	710.115	NA	NA	NA
Wang et al., 2017	10.1016/j.chemosphere.2017.02.026	Lab	Single Stage	Sequencing Batch Biofilm Reactor (SBBR)	SBBR	2.5	Biofilm (BF)	BF	Chongqing, China	0.4743	0.015	Partial Nitrification / Anammox (PNA)	PNA	2.2	Synthetic Wastewater	NA	200 mg/L/d	0.003	0.2	10	44.2857	17.1	75.7286	8	26.2857	0	0	100	128.571	0	0	110	110	0.838	0.838	NA	5.6	NA	NA	4.6928	5.6	4.6928	NA	NA	NA	NA	NA	NA	NA
Kong et al., 2013b	10.1016/j.biortech.2012.10.011	Lab	Single Stage	Sequencing Batch Reactor (SBR)	SBR	2.5	Flocculent Sludge (FS)	FS	Jinan, China	0.6838	0.006	Partial Nitrification (PN)	PN	3.43	Synthetic Wastewater	None	0.00285303	0.00285303	0.475505	0	0	17.439	77.2299	0	0	228.729	751.539	475.505	611.363	219.859	282.676	475.505	475.505	466.028	0.5376	0.00153387	1.36607	3.9e-05	6.12e-05	2.54092	2.54092	1.36607	NA	NA	0.000425316	0.000425316	NA	NA	NA
Kong et al., 2013b	10.1016/j.biortech.2012.10.011	Lab	Single Stage	Sequencing Batch Reactor (SBR)	SBR	2.5	Flocculent Sludge (FS)	FS	Jinan, China	0.6838	0.006	Partial Nitrification (PN)	PN	3.43	Synthetic Wastewater	None	0.00302105	0.00302105	0.503509	0	0	20.4446	90.5403	0	0	240.605	790.559	503.509	647.369	232.541	298.982	503.509	503.509	493.591	0.5382	0.00162581	1.48661	4.49e-05	7.06e-05	2.7624	2.7624	1.48661	NA	NA	0.000490103	0.000490103	NA	NA	NA
Kong et al., 2013b	10.1016/j.biortech.2012.10.011	Lab	Single Stage	Sequencing Batch Reactor (SBR)	SBR	2.5	Flocculent Sludge (FS)	FS	Jinan, China	0.6838	0.006	Partial Nitrification (PN)	PN	3.43	Synthetic Wastewater	None	0.00296286	0.00296286	0.49381	0	0	29.2949	129.734	0	0	229.295	753.397	493.81	634.899	228.488	293.771	493.81	493.81	487.078	0.5373	0.00159193	1.41071	4.18e-05	6.57e-05	2.62559	2.62559	1.41071	NA	NA	0.000456123	0.000456123	NA	NA	NA
Kong et al., 2013b	10.1016/j.biortech.2012.10.011	Lab	Single Stage	Sequencing Batch Reactor (SBR)	SBR	2.5	Flocculent Sludge (FS)	FS	Jinan, China	0.6838	0.006	Partial Nitrification (PN)	PN	3.43	Synthetic Wastewater	None	0.00287061	0.00287061	0.478435	0	0	18.7572	83.0678	0	0	235.693	774.419	478.435	615.13	220.37	283.333	478.435	478.435	474.82	0.5394	0.00154839	1.88839	5.42e-05	8.52e-05	3.50096	3.50096	1.88839	NA	NA	0.000591559	0.000591559	NA	NA	NA
Kong et al., 2013b	10.1016/j.biortech.2012.10.011	Lab	Single Stage	Sequencing Batch Reactor (SBR)	SBR	2.5	Flocculent Sludge (FS)	FS	Jinan, China	0.6838	0.006	Partial Nitrification (PN)	PN	3.43	Synthetic Wastewater	None	0.00280698	0.00280698	0.46783	0	0	37.9911	168.246	0	0	258.152	848.215	467.83	601.495	229.928	295.621	467.83	467.83	526.071	0.5085	0.00142741	1.36161	3.82e-05	6.01e-05	2.67757	2.67757	1.36161	NA	NA	0.000417084	0.000417084	NA	NA	NA
Zhou et al., 2020	10.1016/j.jenvman.2020.110872	Lab	Single Stage	Sequencing Batch Biofilm Reactor (SBBR)	SBBR	2.5	Biofilm (BF)	BF	Shaanxi, China	0.6336	0.006	Nitrification / Anammox (NiA)	NiA	2.96	Synthetic Wastewater	None	0.0004	0.0004	0.0666667	0	0	2.52709	11.1914	0	0	0	0	50	64.2857	0.810114	1.04157	50	50	3.3372	0.9333	0.000295139	2.2	6.49e-06	1.02e-05	2.2	2.2	2.05316	NA	NA	9.45e-05	9.45e-05	NA	NA	125
Huang et al., 2021	10.1016/j.biortech.2021.125910	Lab	Single Stage	Sequencing Batch Biofilm Reactor (SBBR)	SBBR	2.5	Biofilm (BF)	BF	Shaanxi, China	0.6336	0.006	Partial Nitrification / Anammox (PNA)	PNA	2.2	Synthetic Wastewater	10 mgN/L NH2OH dosing	0.00177942	0.00177942	0.296569	0.0847458	0.375303	8.98305	39.7821	0.59322	1.94915	0.762712	2.50605	92	118.286	7.55556	9.71429	92.678	92.678	17.3013	0.8133	0.00045226	1.16	5.25e-06	8.24e-06	1.16	1.16	0.943449	NA	NA	0.000183201	0.000183201	NA	NA	NA
Huang et al., 2021	10.1016/j.biortech.2021.125910	Lab	Single Stage	Sequencing Batch Biofilm Reactor (SBBR)	SBBR	2.5	Biofilm (BF)	BF	Shaanxi, China	0.6336	0.006	Partial Nitrification / Anammox (PNA)	PNA	2.2	Synthetic Wastewater	10 mgN/L NH2OH dosing	0.00175056	0.00175056	0.29176	0	0	6.35593	28.1477	0.508475	1.6707	0.762712	2.50605	90.6667	116.571	4.88889	6.28571	91.1751	91.1751	12.0075	0.8683	0.000475006	1.05	4.99e-06	7.84e-06	1.05	1.05	0.911718	NA	NA	0.000174169	0.000174169	NA	NA	NA
Huang et al., 2021	10.1016/j.biortech.2021.125910	Lab	Single Stage	Sequencing Batch Biofilm Reactor (SBBR)	SBBR	2.5	Biofilm (BF)	BF	Shaanxi, China	0.6336	0.006	Partial Nitrification / Anammox (PNA)	PNA	2.2	Synthetic Wastewater	10 mgN/L NH2OH dosing	0.00175382	0.00175382	0.292303	0.0847458	0.375303	7.0339	31.1501	0.59322	1.94915	0.762712	2.50605	90.6667	116.571	1.77778	2.28571	91.3446	91.3446	9.57439	0.8952	0.000490621	0.96	4.71e-06	7.4e-06	0.96	0.96	0.859377	NA	NA	0.000164475	0.000164475	NA	NA	NA
Huang et al., 2021	10.1016/j.biortech.2021.125910	Lab	Single Stage	Sequencing Batch Biofilm Reactor (SBBR)	SBBR	2.5	Biofilm (BF)	BF	Shaanxi, China	0.6336	0.006	Partial Nitrification / Anammox (PNA)	PNA	2.2	Synthetic Wastewater	None	0.00178492	0.00178492	0.297487	0.0909091	0.402597	17.9091	79.3117	0.636364	2.09091	1	3.28571	92.2374	118.591	13.242	17.0254	92.9647	92.9647	32.1511	0.6542	0.000364882	0.23	8.39e-07	1.32e-06	0.23	0.23	0.150456	NA	NA	2.93e-05	2.93e-05	NA	NA	NA
Huang et al., 2021	10.1016/j.biortech.2021.125910	Lab	Single Stage	Sequencing Batch Biofilm Reactor (SBBR)	SBBR	2.5	Biofilm (BF)	BF	Shaanxi, China	0.6336	0.006	Partial Nitrification / Anammox (PNA)	PNA	2.2	Synthetic Wastewater	None	0.00173581	0.00173581	0.289302	0	0	9.18182	40.6623	0.909091	2.98701	1.45455	4.77922	89.4977	115.068	0	0	90.4068	90.4068	10.6364	0.8823	0.000478623	0.33	1.58e-06	2.48e-06	0.33	0.33	0.291175	NA	NA	5.52e-05	5.52e-05	NA	NA	NA
Huang et al., 2021	10.1016/j.biortech.2021.125910	Lab	Single Stage	Sequencing Batch Biofilm Reactor (SBBR)	SBBR	2.5	Biofilm (BF)	BF	Shaanxi, China	0.6336	0.006	Partial Nitrification / Anammox (PNA)	PNA	2.2	Synthetic Wastewater	None	0.00178318	0.00178318	0.297196	0	0	8.45455	37.4416	0.636364	2.09091	1.18182	3.88312	92.2374	118.591	0.456621	0.587084	92.8738	92.8738	10.093	0.8913	0.000496685	0.18	8.94e-07	1.4e-06	0.18	0.18	0.160439	NA	NA	3.12e-05	3.12e-05	NA	NA	NA
Huang et al., 2021b	10.1016/j.biortech.2021.125225	Lab	Single Stage	Sequencing Batch Biofilm Reactor (SBBR)	SBBR	2.5	Biofilm (BF)	BF	Shaanxi, China	0.6336	0.006	Partial Nitrification / Anammox (PNA)	PNA	2.2	Synthetic Wastewater	None	0.000801758	0.000801758	0.133626	1.31868	5.83987	13.1868	58.3987	1.75824	5.77708	0	0	80.4396	103.422	2.63736	3.39089	83.5165	83.5165	15.8242	0.8105	0.000406154	0.0529353	3.18e-07	3.18e-07	0.0497636	1.38455	1.12222	NA	NA	2.35648	9.82e-05	NA	NA	NA
Huang et al., 2021b	10.1016/j.biortech.2021.125225	Lab	Single Stage	Sequencing Batch Biofilm Reactor (SBBR)	SBBR	2.5	Biofilm (BF)	BF	Shaanxi, China	0.6336	0.006	Partial Nitrification / Anammox (PNA)	PNA	2.2	Synthetic Wastewater	None	0.000805978	0.000805978	0.13433	1.31868	5.83987	10.1099	44.7724	1.75824	5.77708	0	0	80.8791	103.987	0	0	83.956	83.956	10.1099	0.8796	0.000443077	0.080796	4.85e-07	4.85e-07	0.0696254	1.93716	1.70389	NA	NA	3.59673	0.000149864	NA	NA	NA
Huang et al., 2021b	10.1016/j.biortech.2021.125225	Lab	Single Stage	Sequencing Batch Biofilm Reactor (SBBR)	SBBR	2.5	Biofilm (BF)	BF	Shaanxi, China	0.6336	0.006	Partial Nitrification / Anammox (PNA)	PNA	2.2	Synthetic Wastewater	None	0.000869275	0.000869275	0.144879	3.95604	17.5196	12.7473	56.4521	4.83516	15.887	2.63736	8.66562	81.7582	105.118	3.07692	3.95604	90.5495	90.5495	18.4615	0.7961	0.000432527	0.0931343	5.59e-07	5.59e-07	0.0822153	2.28745	1.82107	NA	NA	4.14599	0.000172749	NA	NA	NA
Huang et al., 2021b	10.1016/j.biortech.2021.125225	Lab	Single Stage	Sequencing Batch Biofilm Reactor (SBBR)	SBBR	2.5	Biofilm (BF)	BF	Shaanxi, China	0.6336	0.006	Partial Nitrification / Anammox (PNA)	PNA	2.2	Synthetic Wastewater	None	0.00120102	0.00120102	0.20017	3.40426	15.076	13.617	60.304	0.425532	1.39818	0.851064	2.79635	79.5745	102.31	8.51064	10.9422	83.4043	83.4043	22.9787	0.7245	0.000362553	0.0346154	2.08e-07	2.08e-07	0.0364547	1.33087	0.964205	NA	NA	3.03294	0.000126372	NA	NA	NA
Huang et al., 2021b	10.1016/j.biortech.2021.125225	Lab	Single Stage	Sequencing Batch Biofilm Reactor (SBBR)	SBBR	2.5	Biofilm (BF)	BF	Shaanxi, China	0.6336	0.006	Partial Nitrification / Anammox (PNA)	PNA	2.2	Synthetic Wastewater	None	0.00118264	0.00118264	0.197106	1.70213	7.53799	10.6383	47.1125	0.425532	1.39818	0	0	80	102.857	1.2766	1.64134	82.1277	82.1277	11.9149	0.8549	0.000421277	0.0515385	3.09e-07	3.09e-07	0.0467112	1.70531	1.45791	NA	NA	4.51571	0.000188155	NA	NA	NA
Huang et al., 2021b	10.1016/j.biortech.2021.125225	Lab	Single Stage	Sequencing Batch Biofilm Reactor (SBBR)	SBBR	2.5	Biofilm (BF)	BF	Shaanxi, China	0.6336	0.006	Partial Nitrification / Anammox (PNA)	PNA	2.2	Synthetic Wastewater	None	0.00174026	0.00174026	0.290043	5.10638	22.614	15.7447	69.7264	4.25532	13.9818	3.82979	12.5836	81.2766	104.498	2.97872	3.82979	90.6383	90.6383	22.5532	0.7512	0.000408511	0.0557692	3.35e-07	3.35e-07	0.0521252	1.42722	1.07209	NA	NA	4.8864	0.0002036	NA	NA	NA
Wang et al., 2019	10.1016/j.jes.2019.03.016	Lab	Single Stage	Upflow Anaerobic Sludge Blanket (UASB)	UASB	NA	Granular Sludge (GS)	GS	Beijing, China	0.5688	0.001	Anammox (AMX)	AMX	0	Synthetic Wastewater	None	2.3 kgN/m3/d	0.0023	2.3	0	0	5.4755	24.2487	59.0778	194.113	0	0	37.7522	48.5385	3.45821	4.44627	96.5418	96.5418	0.823	0.823	9.57e-05	0.05 mgN/h in gas, 0.29 mg/N/h in liquid	NA	NA	NA	0.0633948	0.0521739	0.354783	0.431085	5e-05	5e-05	NA	NA	NA
Qian et al., 2018	10.1016/j.bej.2018.07.025	Lab	Single Stage	Upflow Anaerobic Sludge Blanket (UASB)	UASB	NA	Granular Sludge (GS)	GS	Shenzhen, China	0.4715	0.0012	Thiosulfate-Driven Denitritation-anammox (TDD-AMX)	TDD_AMX	2.2	Synthetic Wastewater	Thiosulfate dosing	0.0005256	0.0005256	0.438	0	0	0.750469	3.32351	25	82.1429	0.836	13.4714	48	61.7143	46.1847	59.3804	73	73	51.0352	0.3009	2.64e-05	0.84% load	7.36e-07	1.16e-06	2.79174	2.79174	0.84	NA	NA	0.0002409	0.0002409	NA	NA	NA
Qian et al., 2018	10.1016/j.bej.2018.07.025	Lab	Single Stage	Upflow Anaerobic Sludge Blanket (UASB)	UASB	NA	Granular Sludge (GS)	GS	Shenzhen, China	0.4715	0.0012	Thiosulfate-Driven Denitritation-anammox (TDD-AMX)	TDD_AMX	2.2	Synthetic Wastewater	Thiosulfate dosing	0.0007056	0.0007056	0.588	0	0	1.57598	6.97936	50	164.286	0.863	22.5071	48	61.7143	45.9438	59.0706	98	98	54.3698	0.4452	5.24e-05	0.8	9.41e-07	1.48e-06	1.79692	1.79692	0.8	NA	NA	0.000308	0.000308	NA	NA	NA
Qian et al., 2018	10.1016/j.bej.2018.07.025	Lab	Single Stage	Upflow Anaerobic Sludge Blanket (UASB)	UASB	NA	Granular Sludge (GS)	GS	Shenzhen, China	0.4715	0.0012	Thiosulfate-Driven Denitritation-anammox (TDD-AMX)	TDD_AMX	2.2	Synthetic Wastewater	Thiosulfate dosing	0.0007056	0.0007056	0.588	0	0	2.10131	9.30582	50	164.286	0.891	17.9071	48	61.7143	48.0723	61.8072	98	98	55.6236	0.4324	5.09e-05	0.78	9.17e-07	1.44e-06	1.80383	1.80383	0.78	NA	NA	0.0003003	0.0003003	NA	NA	NA
Qian et al., 2018	10.1016/j.bej.2018.07.025	Lab	Single Stage	Upflow Anaerobic Sludge Blanket (UASB)	UASB	NA	Granular Sludge (GS)	GS	Shenzhen, China	0.4715	0.0012	Thiosulfate-Driven Denitritation-anammox (TDD-AMX)	TDD_AMX	2.2	Synthetic Wastewater	Thiosulfate dosing	0.0007056	0.0007056	0.588	0	0	2.10131	9.30582	50	164.286	0.941	9.69286	48	61.7143	37.5904	48.3305	98	98	42.6417	0.5649	6.64e-05	0.53	6.23e-07	9.79e-07	0.938251	0.938251	0.53	NA	NA	0.00020405	0.00020405	NA	NA	NA
Ge et al., 2009	10.2166/wst.2009.057	Lab	Single Stage	Moving Bed Biofilm Reactor (MBBR)	MBBR	2.5	Biofilm (BF)	BF	Fujisawa-shi, Japan	0.412	0.005	Anammox (AMX)	AMX	0	Synthetic Wastewater	None	0.5 kg/m3/d	0.0025	0.5	15.5039	68.66	93.0233	411.96	549.618	1805.89	13.7405	45.1472	459.184	590.379	27.2109	34.9854	1024.31	1024.31	133.975	0.8692	0.00445166	0.00857143	1.2e-06	1.2e-06	0.00857143	0.00857143	0.00745033	NA	NA	4.6e-06	4.6e-06	NA	NA	NA
Ge et al., 2009	10.2166/wst.2009.057	Lab	Single Stage	Moving Bed Biofilm Reactor (MBBR)	MBBR	2.5	Biofilm (BF)	BF	Fujisawa-shi, Japan	0.412	0.005	Anammox (AMX)	AMX	0	Synthetic Wastewater	None	2.1	0.0105	2.1	35.6589	157.918	94.5736	418.826	549.618	1805.89	9.16031	30.0981	482.993	620.991	17.0068	21.8659	1068.27	1068.27	120.741	0.887	0.00473765	0.06	8.93e-06	8.93e-06	0.06	0.06	0.0532185	NA	NA	0.000151875	0.000151875	NA	NA	NA
Ge et al., 2009	10.2166/wst.2009.057	Lab	Single Stage	Moving Bed Biofilm Reactor (MBBR)	MBBR	2.5	Biofilm (BF)	BF	Fujisawa-shi, Japan	0.412	0.005	Anammox (AMX)	AMX	0	Synthetic Wastewater	None	3.3	0.0165	3.3	13.9535	61.794	91.4729	405.094	567.939	1866.09	4.58015	15.0491	476.19	612.245	23.8095	30.6122	1058.08	1058.08	119.863	0.8867	0.0046911	0.128571	1.9e-05	1.9e-05	0.128571	0.128571	0.114007	NA	NA	0.000511809	0.000511809	NA	NA	NA
Ge et al., 2009	10.2166/wst.2009.057	Lab	Single Stage	Moving Bed Biofilm Reactor (MBBR)	MBBR	2.5	Biofilm (BF)	BF	Fujisawa-shi, Japan	0.412	0.005	Anammox (AMX)	AMX	0	Synthetic Wastewater	None	5.5	0.0275	5.5	4.65116	20.598	99.2248	439.424	577.099	1896.18	13.7405	45.1472	465.986	599.125	30.6122	39.3586	1047.74	1047.74	143.578	0.863	0.0045208	0.0057143	8.12e-07	8.12e-07	0.0057143	0.0057143	0.00493124	NA	NA	3.57e-05	3.57e-05	NA	NA	NA
Matsunaga et al., 2012	10.2166/wst.2012.222	Lab	Single Stage	Upflow Anaerobic Sludge Blanket (UASB)	UASB	NA	Granular Sludge (GS)	GS	Higashihiroshima, Japan	0.571	0.00134	Anammox (AMX)	AMX	0	Synthetic Wastewater	Degassing membrane	2.98148148 kg/m3/d	0.00399519	2.98148	NA	NA	NA	NA	NA	NA	NA	NA	NA	NA	NA	NA	633.565	633.565	1.22338	0.4103	0.000348357	6.45526614 mL/d	2.69e-06	2.69e-06	0.492219	0.491954	0.201962	NA	NA	0.000394278	0.000394278	NA	NA	NA
Matsunaga et al., 2012	10.2166/wst.2012.222	Lab	Single Stage	Upflow Anaerobic Sludge Blanket (UASB)	UASB	NA	Granular Sludge (GS)	GS	Higashihiroshima, Japan	0.571	0.00134	Anammox (AMX)	AMX	0	Synthetic Wastewater	None	2.98148148 kg/m3/d	0.00399519	2.98148	NA	NA	NA	NA	NA	NA	NA	NA	NA	NA	NA	NA	633.565	633.565	1.41782	0.4755	0.000403725	16.6025	6.93e-06	6.93e-06	1.09234	1.09179	0.519453	NA	NA	0.00101406	0.00101406	NA	NA	NA
Bao et al., 2018	10.1016/j.chemosphere.2018.08.090	Lab	Single Stage	Sequencing Batch Reactor (SBR)	SBR	2.5	Flocculent Sludge (FS)	FS	Girona, Spain	0.14	0.008	Partial Nitrification (PN)	PN	3.43	Synthetic Wastewater	None	0.00190426	0.00190426	0.238032	0	0	NA	NA	0	0	NA	NA	238.032	306.041	NA	NA	238.032	238.032	7.45591	0.9687	NA	NA	NA	NA	0.018	0.44	0.426218	NA	NA	NA	NA	NA	NA	NA
Bao et al., 2018	10.1016/j.chemosphere.2018.08.090	Lab	Single Stage	Sequencing Batch Reactor (SBR)	SBR	2.5	Flocculent Sludge (FS)	FS	Girona, Spain	0.14	0.008	Partial Nitrification (PN)	PN	3.43	Synthetic Wastewater	None	0.00207427	0.00207427	0.259283	0	0	NA	NA	0	0	NA	NA	259.283	333.364	NA	NA	259.283	259.283	12.0404	0.9536	NA	NA	NA	NA	0.033	0.85	0.810528	NA	NA	NA	NA	NA	NA	NA
Bao et al., 2018	10.1016/j.chemosphere.2018.08.090	Lab	Single Stage	Sequencing Batch Reactor (SBR)	SBR	2.5	Flocculent Sludge (FS)	FS	Girona, Spain	0.14	0.008	Partial Nitrification (PN)	PN	3.43	Synthetic Wastewater	None	0.00192266	0.00192266	0.240333	0	0	NA	NA	0	0	NA	NA	240.333	309	NA	NA	240.333	240.333	24.6688	0.8974	NA	NA	NA	NA	0	0.77	0.690964	NA	NA	NA	NA	NA	NA	NA
Bao et al., 2018	10.1016/j.chemosphere.2018.08.090	Lab	Single Stage	Sequencing Batch Reactor (SBR)	SBR	2.5	Flocculent Sludge (FS)	FS	Girona, Spain	0.14	0.008	Partial Nitrification (PN)	PN	3.43	Synthetic Wastewater	None	0.00218884	0.00218884	0.273605	0	0	NA	NA	0	0	NA	NA	273.605	351.778	NA	NA	273.605	273.605	40.7366	0.8511	NA	NA	NA	NA	0	0.57	0.485134	NA	NA	NA	NA	NA	NA	NA
Bao et al., 2018	10.1016/j.chemosphere.2018.08.090	Lab	Single Stage	Sequencing Batch Reactor (SBR)	SBR	2.5	Flocculent Sludge (FS)	FS	Girona, Spain	0.14	0.008	Partial Nitrification (PN)	PN	3.43	Synthetic Wastewater	None	0.00103512	0.00103512	0.129389	0	0	NA	NA	0	0	NA	NA	129.389	166.358	NA	NA	129.389	129.389	5.72519	0.9558	NA	NA	NA	NA	0	0.15	0.143363	NA	NA	NA	NA	NA	NA	NA
Pijuan et al., 2014	10.1016/j.watres.2013.11.009	Pilot	Single Stage	Sequencing Batch Reactor (SBR)	SBR	2.5	Flocculent Sludge (FS)	FS	Catalonia, Spain	0.256	0.15	Partial Nitrification (PN)	PN	3.43	Reject Water	None	0.198621	0.198621	1.32414	NA	NA	1.72414	7.63547	NA	NA	615.517	2022.41	662.069	851.232	44.8276	57.6355	662.069	662.069	662.069	0.9323	1.31e-10	6.0101	0.00874425	0.00874425	6.0101	6.0101	5.4869	NA	NA	0.00485792	0.00485792	NA	NA	NA
Pijuan et al., 2014	10.1016/j.watres.2013.11.009	Pilot	Single Stage	Sequencing Batch Reactor (SBR)	SBR	2.5	Flocculent Sludge (FS)	FS	Catalonia, Spain	0.256	0.15	Partial Nitrification (PN)	PN	3.43	Reject Water	None	0.247759	0.247759	1.65172	NA	NA	3.44828	15.2709	NA	NA	739.655	2430.3	825.862	1061.82	56.8966	73.1527	825.862	825.862	800	0.9311	0.00387931	4.79798	0.00869663	0.00869663	4.79798	4.79798	4.37299	NA	NA	0.00483146	0.00483146	NA	NA	NA
Pijuan et al., 2014	10.1016/j.watres.2013.11.009	Pilot	Single Stage	Sequencing Batch Reactor (SBR)	SBR	2.5	Flocculent Sludge (FS)	FS	Catalonia, Spain	0.256	0.15	Partial Nitrification (PN)	PN	3.43	Reject Water	None	0.248793	0.248793	1.65862	NA	NA	3.44828	15.2709	NA	NA	732.759	2407.64	829.31	1066.26	67.2414	86.4532	829.31	829.31	803.448	0.9189	0.00387931	4.44444	0.00798358	0.00798358	4.44444	4.44444	3.98112	NA	NA	0.00443532	0.00443532	NA	NA	NA
Pijuan et al., 2014	10.1016/j.watres.2013.11.009	Pilot	Single Stage	Sequencing Batch Reactor (SBR)	SBR	2.5	Flocculent Sludge (FS)	FS	Catalonia, Spain	0.256	0.15	Partial Nitrification (PN)	PN	3.43	Reject Water	None	0.240517	0.240517	1.60345	NA	NA	3.44828	15.2709	NA	NA	727.586	2390.64	801.724	1030.79	51.7241	66.5025	801.724	801.724	782.759	0.9355	0.00284483	4.59596	0.008125	0.008125	4.59596	4.59596	4.21473	NA	NA	0.00451389	0.00451389	NA	NA	NA
Pijuan et al., 2014	10.1016/j.watres.2013.11.009	Pilot	Single Stage	Sequencing Batch Reactor (SBR)	SBR	2.5	Flocculent Sludge (FS)	FS	Catalonia, Spain	0.256	0.15	Partial Nitrification (PN)	PN	3.43	Reject Water	None	0.232241	0.232241	1.54828	NA	NA	0	0	NA	NA	427.586	1404.93	774.138	995.32	331.034	425.616	774.138	774.138	758.621	0.5724	0.00232759	2.3569	0.00246169	0.00246169	2.3569	2.3569	1.06109	NA	NA	0.0013676	0.0013676	NA	NA	NA
Freyschmidt et al., 2022	10.2166/wst.2022.307	Pilot	Single Stage	Moving Bed Biofilm Reactor (MBBR)	MBBR	2.5	Biofilm (BF)	BF	Hannover, Germany	0.32	0.22	Partial Nitrification / Anammox (PNA)	PNA	2.2	Domestic Wastewater	Intermittent Areation	0.096	0.096	0.436364	NA	NA	NA	NA	NA	NA	NA	NA	800	1028.57	NA	NA	NA	NA	NA	NA	NA	11.7138	NA	NA	8.8	8.8	NA	NA	NA	0.359848	0.359848	NA	NA	NA
Zhang et al., 2024	10.1016/j.scitotenv.2023.167520	Lab	Single Stage	Moving Bed Biofilm Reactor (MBBR)	MBBR	2.5	Biofilm (BF)	BF	Beijing, China	0.558	0.01599	Partial Nitrification / Anammox (PNA)	PNA	2.2	Domestic Wastewater	None	0.004797	0.004797	0.3	0	0	34.2391	151.63	0	0	24.0942	79.1667	300	385.714	25.3623	32.6087	300	300	0.7236	0.7236	NA	NA	NA	NA	NA	NA	3.03676	3.03676	4.19653	NA	NA	NA	NA	80
Zhang et al., 2024	10.1016/j.scitotenv.2023.167520	Lab	Single Stage	Moving Bed Biofilm Reactor (MBBR)	MBBR	2.5	Biofilm (BF)	BF	Beijing, China	0.558	0.01599	Partial Nitrification / Anammox (PNA)	PNA	2.2	Domestic Wastewater	Reflux 100%	0.004797	0.004797	0.3	0	0	42.6523	188.889	0	0	16.3082	53.5842	300	385.714	17.5627	22.5806	300	300	0.76	0.76	NA	NA	NA	NA	NA	NA	2.7451	2.7451	3.61197	NA	NA	NA	NA	80
Zhang et al., 2024	10.1016/j.scitotenv.2023.167520	Lab	Single Stage	Moving Bed Biofilm Reactor (MBBR)	MBBR	2.5	Biofilm (BF)	BF	Beijing, China	0.558	0.01599	Partial Nitrification / Anammox (PNA)	PNA	2.2	Domestic Wastewater	Reflux 200%	0.004797	0.004797	0.3	0	0	51.0949	226.277	0	0	6.38686	20.9854	300	385.714	7.66423	9.85401	300	300	0.7831	0.7831	NA	NA	NA	NA	NA	NA	2.21324	2.21324	2.82629	NA	NA	NA	NA	80
Zhang et al., 2024	10.1016/j.scitotenv.2023.167520	Lab	Single Stage	Moving Bed Biofilm Reactor (MBBR)	MBBR	2.5	Biofilm (BF)	BF	Beijing, China	0.558	0.01599	Partial Nitrification / Anammox (PNA)	PNA	2.2	Domestic Wastewater	Reflux 300%	0.004797	0.004797	0.3	0	0	77.9197	345.073	0	0	8.94161	29.3796	300	385.714	11.4964	14.781	300	300	0.7059	0.7059	NA	NA	NA	NA	NA	NA	3.21977	3.21977	4.56134	NA	NA	NA	NA	80
Kampschreur et al., 2008	10.1016/j.watres.2007.08.022	Full	Single Stage	Completely Stirred Tank Reactor (CSTR)	CSTR	2.5	Flocculent Sludge (FS)	FS	Rotterdam, The Netherlands	0.442	1500	Partial Nitrification (PN)	PN	3.43	Reject Water	None	0.65 kgN/m3/d	975	0.65	NA	NA	22	97.4286	NA	NA	505	1659.29	1442.15	1854.2	372	478.286	NA	NA	0.34 kgN/m3/d	0.5231	NA	NA	NA	NA	NA	3.3	1.7	NA	NA	NA	NA	NA	NA	NA
Kampschreur et al., 2008	10.1016/j.watres.2007.08.022	Full	Single Stage	Completely Stirred Tank Reactor (CSTR)	CSTR	2.5	Flocculent Sludge (FS)	FS	Rotterdam, The Netherlands	0.442	70	Anammox (AMX)	AMX	0	Reject Water	None	11.47	802.9	11.47	17	75.2857	75	332.143	414	1360.29	3	9.85714	372	478.286	48	61.7143	803	803	9.67 kgN/m3/d	0.8431	NA	NA	NA	NA	NA	0.68	0.6	NA	NA	NA	NA	NA	NA	NA
Kampschreur et al., 2008	10.1016/j.watres.2007.08.022	Full	Single Stage	Expanded Granular Sludge Bed (EGSB)	EGSB	NA	Granular Sludge (GS)	GS	Olburgen, The Netherlands	0.442	600	Partial Nitrification / Anammox (PNA)	PNA	2.2	Reject Water	None	1.2	720	1.2	NA	NA	NA	NA	NA	NA	NA	NA	NA	NA	NA	NA	NA	NA	NA	NA	NA	NA	NA	NA	NA	0.800915	NA	NA	NA	NA	NA	NA	NA	NA
Desloover et al., 2011	10.1016/j.watres.2011.02.028	Full	Single Stage	Completely Stirred Tank Reactor (CSTR)	CSTR	2.5	Flocculent Sludge (FS)	FS	Bergen op Zoom, The Netherlands	0.442	2406.3	Partial Nitrification (PN)	PN	3.43	Industrial Wastewater	None	1851 m3/d	481.26	0.2	0.342157	1.51527	36.1967	160.299	0.414191	1.36091	116.874	384.014	236.809	304.469	79.7767	102.57	237.565	237.565	0.09 kgN/m3/d	0.45	NA	NA	NA	NA	NA	13.5	5.85	NA	NA	NA	NA	NA	NA	442
Desloover et al., 2011	10.1016/j.watres.2011.02.028	Full	Single Stage	Completely Stirred Tank Reactor (CSTR)	CSTR	2.5	Flocculent Sludge (FS)	FS	Bergen op Zoom, The Netherlands	0.442	1660.68	Anammox (AMX)	AMX	0	Industrial Wastewater	None	5931	448.384	0.27	13.3198	58.9879	3.54072	15.6803	44.8491	147.361	8.76749	28.8075	34.2269	44.0061	9.27331	11.9228	92.3959	92.3959	0.26 kgN/m3/d	0.963	NA	NA	NA	NA	NA	0	0	NA	NA	NA	NA	NA	NA	123
Chuang et al., 2007	10.1016/j.watres.2006.10.019	Lab	Single Stage	Down-flow Hanging Sponge (DHS)	DHS	NA	Biofilm (BF)	BF	Niigata, Japan	0.444	0.0025	Partial Nitrification (PN)	PN	3.43	Synthetic Wastewater	Step Feeding	6.42	0.01605	6.42	0	0	40	177.143	0	0	17	55.8571	400	514.286	338	434.571	400	400	0.91 kgN/m3/d	0.1417	NA	NA	NA	NA	4.97	4.97	0.70447	NA	NA	NA	NA	NA	NA	NA
Chuang et al., 2007	10.1016/j.watres.2006.10.019	Lab	Single Stage	Down-flow Hanging Sponge (DHS)	DHS	NA	Biofilm (BF)	BF	Niigata, Japan	0.444	0.0025	Partial Nitrification (PN)	PN	3.43	Synthetic Wastewater	Step Feeding	1.6	0.004	1.6	0	0	10	44.2857	0	0	33	108.429	100	128.571	56	72	100	100	0.7	0.4375	NA	NA	NA	NA	11.27	11.27	4.93063	NA	NA	NA	NA	NA	NA	NA
Lackner et al., 2014	10.1016/j.watres.2014.02.032	Full	Single Stage	Sequencing Batch Reactor (SBR)	SBR	2.5	Granular Sludge + Flocculent Sludge (GS+FS)	GS+FS	Amersfort, The Netherlands	0.442	780	Partial Nitrification / Anammox (PNA)	PNA	2.2	Reject Water	NA	0.65 kgN/m3/d	507	0.65	NA	NA	25	110.714	NA	NA	5	16.4286	500	642.857	150	192.857	NA	NA	NA	0.64	NA	NA	NA	NA	NA	NA	NA	NA	NA	NA	NA	NA	NA	NA
Lackner et al., 2014	10.1016/j.watres.2014.02.032	Full	Single Stage	Sequencing Batch Reactor (SBR)	SBR	2.5	Granular Sludge + Flocculent Sludge (GS+FS)	GS+FS	Apeldoorn, The Netherlands	0.442	2400	Partial Nitrification / Anammox (PNA)	PNA	2.2	Reject Water	NA	0.54	1296	0.54	NA	NA	50	221.429	NA	NA	5	16.4286	1000	1285.71	100	128.571	NA	NA	NA	0.845	NA	NA	NA	NA	NA	NA	NA	NA	NA	NA	NA	NA	NA	NA
Lackner et al., 2014	10.1016/j.watres.2014.02.032	Full	Single Stage	Sequencing Batch Reactor (SBR)	SBR	2.5	Granular Sludge + Flocculent Sludge (GS+FS)	GS+FS	Balingen, Germany	0.47	705	Partial Nitrification / Anammox (PNA)	PNA	2.2	Reject Water	NA	0.075	52.875	0.075	NA	NA	50	221.429	NA	NA	1	3.28571	500	642.857	100	128.571	NA	NA	NA	0.698	NA	NA	NA	NA	NA	NA	NA	NA	NA	NA	NA	NA	NA	NA
Lackner et al., 2014	10.1016/j.watres.2014.02.032	Full	Single Stage	Sequencing Batch Reactor (SBR)	SBR	2.5	Granular Sludge + Flocculent Sludge (GS+FS)	GS+FS	Heidelberg, Germany	0.47	1140	Partial Nitrification / Anammox (PNA)	PNA	2.2	Reject Water	NA	0.2	228	0.2	NA	NA	50	221.429	NA	NA	5	16.4286	1000	1285.71	50	64.2857	NA	NA	NA	0.895	NA	NA	NA	NA	NA	NA	NA	NA	NA	NA	NA	NA	NA	NA
Lackner et al., 2014	10.1016/j.watres.2014.02.032	Full	Single Stage	Sequencing Batch Reactor (SBR)	SBR	2.5	Flocculent Sludge (FS)	FS	Ingolstadt, Germany	0.47	1120	Partial Nitrification / Anammox (PNA)	PNA	2.2	Reject Water	NA	0.19	212.8	0.19	NA	NA	100	442.857	NA	NA	1	3.28571	1000	1285.71	150	192.857	NA	NA	NA	0.749	NA	NA	NA	NA	NA	NA	NA	NA	NA	NA	NA	NA	NA	NA
Lackner et al., 2014	10.1016/j.watres.2014.02.032	Full	Single Stage	Sequencing Batch Reactor (SBR)	SBR	2.5	Granular Sludge + Flocculent Sludge (GS+FS)	GS+FS	Nieuwegein, The Netherlands	0.442	450	Partial Nitrification / Anammox (PNA)	PNA	2.2	Reject Water	Intermittant Aeration	0.61	274.5	0.61	NA	NA	100	442.857	NA	NA	20	65.7143	1000	1285.71	200	257.143	NA	NA	NA	0.68	NA	NA	NA	NA	NA	NA	NA	NA	NA	NA	NA	NA	NA	NA
Lackner et al., 2014	10.1016/j.watres.2014.02.032	Full	Single Stage	Sequencing Batch Reactor (SBR)	SBR	2.5	Granular Sludge + Flocculent Sludge (GS+FS)	GS+FS	Plettenberg, Germany	0.47	134	Partial Nitrification / Anammox (PNA)	PNA	2.2	Reject Water	NA	0.45	60.3	0.45	NA	NA	50	221.429	NA	NA	5	16.4286	500	642.857	100	128.571	NA	NA	NA	0.69	NA	NA	NA	NA	NA	NA	NA	NA	NA	NA	NA	NA	NA	NA
Lackner et al., 2014	10.1016/j.watres.2014.02.032	Full	Single Stage	Sequencing Batch Reactor (SBR)	SBR	2.5	Flocculent Sludge (FS)	FS	Z√ºrich, Switzerland	0.16	2800	Partial Nitrification / Anammox (PNA)	PNA	2.2	Reject Water	NA	0.4	1120	0.4	NA	NA	20	88.5714	NA	NA	1	3.28571	700	900	50	64.2857	NA	NA	NA	0.8986	NA	NA	NA	NA	NA	NA	NA	NA	NA	NA	NA	NA	NA	NA
Lackner et al., 2014	10.1016/j.watres.2014.02.032	Full	Single Stage	Moving Bed Biofilm Reactor (MBBR)	MBBR	2.5	Biofilm (BF)	BF	Malm√∂, Sweden	0.022	200	Partial Nitrification / Anammox (PNA)	PNA	2.2	Reject Water	NA	1.1	220	1.1	NA	NA	100	442.857	NA	NA	5	16.4286	1000	1285.71	100	128.571	NA	NA	NA	0.795	NA	NA	NA	NA	NA	NA	NA	NA	NA	NA	NA	NA	NA	NA
Lackner et al., 2014	10.1016/j.watres.2014.02.032	Full	Single Stage	Expanded Granular Sludge Bed (EGSB)	EGSB	NA	Granular Sludge (GS)	GS	Olburgen, The Netherlands	0.442	600	Partial Nitrification / Anammox (PNA)	PNA	2.2	Industrial Wastewater	NA	1.665	999	1.665	NA	NA	25	110.714	NA	NA	25	82.1429	500	642.857	25	32.1429	NA	NA	NA	0.85	NA	NA	NA	NA	NA	NA	NA	NA	NA	NA	NA	NA	NA	NA
Lackner et al., 2014	10.1016/j.watres.2014.02.032	Full	Two Stage	Gas Lift Reactor (GLR)	GLR	1.2	Granular Sludge + Flocculent Sludge (GS+FS)	GS+FS	Lichtenvoorde, The Netherlands	0.442	225	Partial Nitrification / Anammox (PNA)	PNA	2.2	Industrial Wastewater	NA	1.335	300.375	1.335	NA	NA	25	110.714	NA	NA	10	32.8571	500	642.857	25	32.1429	NA	NA	NA	0.88	NA	NA	NA	NA	NA	NA	NA	NA	NA	NA	NA	NA	NA	NA
Lackner et al., 2014	10.1016/j.watres.2014.02.032	Full	Two Stage	Integrated Fixed-Film Activated Sludge (IFAS)	IFAS	2.5	Biofilm + Flocculent Sludge (BF+FS)	BF+FS	Landshut, Germany	0.47	783	Partial Nitrification / Anammox (PNA)	PNA	2.2	Reject Water	NA	0.88	689.04	0.88	NA	NA	25	110.714	NA	NA	1	3.28571	1500	1928.57	100	128.571	NA	NA	NA	0.916	NA	NA	NA	NA	NA	NA	NA	NA	NA	NA	NA	NA	NA	NA
Lackner et al., 2014	10.1016/j.watres.2014.02.032	Full	Two Stage	Completely Stirred Tank Reactor (CSTR)	CSTR	2.5	Granular Sludge (GS)	GS	Rotterdam, The Netherlands	0.442	2500	Partial Nitrification / Anammox (PNA)	PNA	2.2	Reject Water	NA	3.65	9125	3.65	NA	NA	100	442.857	NA	NA	5	16.4286	1000	1285.71	50	64.2857	NA	NA	NA	0.845	NA	NA	NA	NA	NA	NA	NA	NA	NA	NA	NA	NA	NA	NA
Lackner et al., 2014	10.1016/j.watres.2014.02.032	Full	Single Stage	Sequencing Batch Reactor (SBR)	SBR	2.5	Granular Sludge + Flocculent Sludge (GS+FS)	GS+FS	Bergen op Zoom, The Netherlands	0.442	7920	Partial Nitrification / Anammox (PNA)	PNA	2.2	Industrial Wastewater	NA	0.1	792	0.1	NA	NA	10	44.2857	NA	NA	NA	NA	500	642.857	5	6.42857	NA	NA	NA	0.97	NA	NA	NA	NA	NA	NA	NA	NA	NA	NA	NA	NA	NA	NA
Zhou et al., 2021	10.1002/wer.1549	Lab	Single Stage	Attached-Film Expanded Bed (AFEB)	AFEB	1.2	Biofilm (BF)	BF	Xiamen, China	0.4711	0.0025	Anammox (AMX)	AMX	0	Synthetic Wastewater	5mg/L Fe(II)	10g/L/d	0.025	10	NA	NA	32.0275	141.836	192.852	633.657	31.0653	102.072	173.196	222.68	29.1409	37.4669	350	350	0.7874	0.7874	NA	NA	NA	NA	0.05	0.05	0.0635001	NA	NA	NA	NA	NA	NA	NA
Zhou et al., 2021	10.1002/wer.1549	Lab	Single Stage	Attached-Film Expanded Bed (AFEB)	AFEB	1.2	Biofilm (BF)	BF	Xiamen, China	0.4711	0.0025	Anammox (AMX)	AMX	0	Synthetic Wastewater	20mg/L Fe(II)	10	0.025	10	NA	NA	22.543	99.8331	194.364	638.625	2.74914	9.03289	169.759	218.262	15.5326	19.9705	350	350	0.8816	0.8816	NA	NA	NA	NA	0.17	0.17	0.192831	NA	NA	NA	NA	NA	NA	NA
Ali et al., 2016	10.1016/j.watres.2016.06.034	Lab	Single Stage	Sequencing Batch Reactor (SBR)	SBR	2.5	Granular Sludge (GS)	GS	Hokkaido, Japan	0.516	0.002	Partial Nitrification / Anammox (PNA)	PNA	2.2	Synthetic Wastewater	NA	0.0012	0.0012	0.6	NA	NA	NA	NA	NA	NA	NA	NA	300	385.714	NA	NA	300	300	NA	0.7259	NA	NA	NA	NA	0.98	1.35	0.98	NA	NA	NA	NA	NA	NA	NA
Kampschreur et al., 2009	10.2166/wst.2009.608	Full	Single Stage	Completely Stirred Tank Reactor (CSTR)	CSTR	2.5	Granular Sludge (GS)	GS	Delft, The Netherlands	0.442	600	Partial Nitrification / Anammox (PNA)	PNA	2.2	Reject Water	NA	2 kgN/m3/d	1200	2	NA	NA	NA	NA	NA	NA	NA	NA	250	321.429	NA	NA	250	250	NA	0.7365	NA	NA	NA	NA	1.23	1.67	1.23	NA	NA	NA	NA	NA	NA	NA
De Clippeleir et al., 2013	10.1007/s00253-013-4744-x	Lab	Single Stage	Rotating Biological Contactor (RBC)	RBC	2.1	Biofilm (BF)	BF	Gent, Belgium	0.208	0.0025	Partial Nitrification / Anammox (PNA)	PNA	2.2	Synthetic Wastewater	NA	1169 mgN/L/d	0.0029225	1.169	NA	NA	17	75.2857	NA	NA	14	46	57.5	73.9286	9	11.5714	57.5	57.5	0.38	0.38	NA	NA	NA	NA	5.1	13.4211	5.1	NA	NA	NA	NA	NA	NA	NA
De Clippeleir et al., 2013	10.1007/s00253-013-4744-x	Lab	Single Stage	Rotating Biological Contactor (RBC)	RBC	2.1	Biofilm (BF)	BF	Gent, Belgium	0.208	0.0025	Partial Nitrification / Anammox (PNA)	PNA	2.2	Synthetic Wastewater	NA	585	0.0014625	0.585	NA	NA	37	163.857	NA	NA	13	42.7143	57.5	73.9286	1.4	1.8	57.5	57.5	0.17	0.17	NA	NA	NA	NA	6.4	37.6471	6.4	NA	NA	NA	NA	NA	NA	NA
De Clippeleir et al., 2013	10.1007/s00253-013-4744-x	Lab	Single Stage	Rotating Biological Contactor (RBC)	RBC	2.1	Biofilm (BF)	BF	Gent, Belgium	0.208	0.0025	Partial Nitrification / Anammox (PNA)	PNA	2.2	Domestic Wastewater	NA	1340	0.00335	1.34	NA	NA	18	79.7143	NA	NA	6	19.7143	34.5	44.3571	11	14.1429	34.5	34.5	0.35	0.35	NA	NA	NA	NA	5	14.2857	5	NA	NA	NA	NA	NA	NA	NA
De Clippeleir et al., 2013	10.1007/s00253-013-4744-x	Lab	Single Stage	Rotating Biological Contactor (RBC)	RBC	2.1	Biofilm (BF)	BF	Gent, Belgium	0.208	0.0025	Partial Nitrification / Anammox (PNA)	PNA	2.2	Domestic Wastewater	NA	1554	0.003885	1.554	NA	NA	16	70.8571	NA	NA	6	19.7143	34.5	44.3571	19	24.4286	34.5	34.5	0.28	0.28	NA	NA	NA	NA	4.5	16.0714	4.5	NA	NA	NA	NA	NA	NA	NA
De Clippeleir et al., 2013	10.1007/s00253-013-4744-x	Lab	Single Stage	Rotating Biological Contactor (RBC)	RBC	2.1	Biofilm (BF)	BF	Gent, Belgium	0.208	0.0025	Partial Nitrification / Anammox (PNA)	PNA	2.2	Domestic Wastewater	NA	1737	0.0043425	1.737	NA	NA	18	79.7143	NA	NA	18	59.1429	34.5	44.3571	12	15.4286	34.5	34.5	0.32	0.32	NA	NA	NA	NA	6.2	19.375	6.2	NA	NA	NA	NA	NA	NA	NA
De Clippeleir et al., 2013	10.1007/s00253-013-4744-x	Lab	Single Stage	Rotating Biological Contactor (RBC)	RBC	2.1	Biofilm (BF)	BF	Gent, Belgium	0.208	0.0025	Partial Nitrification / Anammox (PNA)	PNA	2.2	Domestic Wastewater	NA	2718	0.006795	2.718	NA	NA	20	88.5714	NA	NA	9	29.5714	34.5	44.3571	58	74.5714	34.5	34.5	0.27	0.27	NA	NA	NA	NA	3	11.1111	3	NA	NA	NA	NA	NA	NA	NA
Castro-Barros et al., 2015	10.1016/j.watres.2014.10.056	Full	Single Stage	Expanded Granular Sludge Bed (EGSB)	EGSB	NA	Granular Sludge (GS)	GS	Olburgen, The Netherlands	0.442	600	Partial Nitrification / Anammox (PNA)	PNA	2.2	Reject Water	NA	1.76 kgN/m3/d	1056	1.76	NA	NA	NA	NA	NA	NA	17.996 kg/d	5.81266	0.924	267.748	63	20.3488	NA	NA	0.744	0.744	NA	NA	NA	NA	2.5	3.36022	2.5	NA	NA	NA	NA	NA	NA	NA
Castro-Barros et al., 2015	10.1016/j.watres.2014.10.056	Full	Single Stage	Expanded Granular Sludge Bed (EGSB)	EGSB	NA	Granular Sludge (GS)	GS	Olburgen, The Netherlands	0.442	600	Partial Nitrification / Anammox (PNA)	PNA	2.2	Reject Water	NA	1.76 kgN/m3/d	1056	1.76	NA	NA	NA	NA	NA	NA	15.95	5.15181	0.924	275.398	64.8	20.9302	NA	NA	0.744	0.744	NA	NA	NA	NA	1	1.34409	1	NA	NA	NA	NA	NA	NA	NA
Arora et al., 2019	10.1021/acs.iecr.9b04591	Pilot	Single Stage	Sequencing Batch Reactor (SBR)	SBR	2.5	Flocculent Sludge (FS)	FS	Gyeongsan, Republic of Korea	0.74	0.55	Partial Nitrification / Anammox (PNA)	PNA	2.2	Reject Water	NA	0.3245	0.3245	0.59	35.5	157.214	15.9	70.4143	76	24.5478	23.4	7.55814	183.5	235.929	44.5	57.2143	295	295	0.715932	0.7159	NA	NA	NA	NA	4.4 g N2O kg‚àí1 N eliminated	0.28	0.391098	NA	NA	NA	NA	NA	NA	250
Cao et al., 2024	10.1016/j.jclepro.2023.139916	Lab	Single Stage	Sequencing Batch Reactor (SBR)	SBR	2.5	Flocculent Sludge (FS)	FS	Beijing, China	0.558	0.005	Partial Denitrification (PD)	PD	0	Synthetic Wastewater	NA	0.00286567	0.00286567	0.573134	80	354.286	NA	NA	NA	NA	NA	NA	NA	NA	NA	NA	NA	NA	NA	NA	NA	NA	NA	NA	NA	NA	NA	17.2	17.2	NA	NA	NA	NA	NA
Cao et al., 2024	10.1016/j.jclepro.2023.139916	Lab	Single Stage	Sequencing Batch Reactor (SBR)	SBR	2.5	Flocculent Sludge (FS)	FS	Beijing, China	0.558	0.005	Partial Denitrification (PD)	PD	0	Synthetic Wastewater	NA	0.00286567	0.00286567	0.573134	80	354.286	NA	NA	NA	NA	NA	NA	NA	NA	NA	NA	NA	NA	NA	NA	NA	NA	NA	NA	NA	NA	NA	10.9	10.9	NA	NA	NA	NA	NA
Cao et al., 2024	10.1016/j.jclepro.2023.139916	Lab	Single Stage	Sequencing Batch Reactor (SBR)	SBR	2.5	Flocculent Sludge (FS)	FS	Beijing, China	0.558	0.005	Partial Denitrification (PD)	PD	0	Synthetic Wastewater	NA	0.00286567	0.00286567	0.573134	80	354.286	NA	NA	NA	NA	NA	NA	NA	NA	NA	NA	NA	NA	NA	NA	NA	NA	NA	NA	NA	NA	NA	9.5	9.5	NA	NA	NA	NA	NA
Cao et al., 2024	10.1016/j.jclepro.2023.139916	Lab	Single Stage	Sequencing Batch Reactor (SBR)	SBR	2.5	Flocculent Sludge (FS)	FS	Beijing, China	0.558	0.005	Partial Denitrification (PD)	PD	0	Synthetic Wastewater	NA	0.00286567	0.00286567	0.573134	80	354.286	NA	NA	NA	NA	NA	NA	NA	NA	NA	NA	NA	NA	NA	NA	NA	NA	NA	NA	NA	NA	NA	6	6	NA	NA	NA	NA	NA
Cao et al., 2024	10.1016/j.jclepro.2023.139916	Lab	Single Stage	Sequencing Batch Reactor (SBR)	SBR	2.5	Flocculent Sludge (FS)	FS	Beijing, China	0.558	0.005	Partial Denitrification (PD)	PD	0	Synthetic Wastewater	NA	0.00286567	0.00286567	0.573134	80	354.286	NA	NA	NA	NA	NA	NA	NA	NA	NA	NA	NA	NA	NA	NA	NA	NA	NA	NA	NA	NA	NA	63.4	63.4	NA	NA	NA	NA	NA
Cao et al., 2024	10.1016/j.jclepro.2023.139916	Lab	Single Stage	Sequencing Batch Reactor (SBR)	SBR	2.5	Flocculent Sludge (FS)	FS	Beijing, China	0.558	0.005	Partial Denitrification (PD)	PD	0	Synthetic Wastewater	NA	0.00286567	0.00286567	0.573134	80	354.286	NA	NA	NA	NA	NA	NA	NA	NA	NA	NA	NA	NA	NA	NA	NA	NA	NA	NA	NA	NA	NA	39.9	39.9	NA	NA	NA	NA	NA
Cao et al., 2024	10.1016/j.jclepro.2023.139916	Lab	Single Stage	Sequencing Batch Reactor (SBR)	SBR	2.5	Flocculent Sludge (FS)	FS	Beijing, China	0.558	0.005	Partial Denitrification (PD)	PD	0	Synthetic Wastewater	NA	0.00286567	0.00286567	0.573134	80	354.286	NA	NA	NA	NA	NA	NA	NA	NA	NA	NA	NA	NA	NA	NA	NA	NA	NA	NA	NA	NA	NA	18.9	18.9	NA	NA	NA	NA	NA
Cao et al., 2024	10.1016/j.jclepro.2023.139916	Lab	Single Stage	Sequencing Batch Reactor (SBR)	SBR	2.5	Flocculent Sludge (FS)	FS	Beijing, China	0.558	0.005	Partial Denitrification (PD)	PD	0	Synthetic Wastewater	NA	0.00286567	0.00286567	0.573134	80	354.286	NA	NA	NA	NA	NA	NA	NA	NA	NA	NA	NA	NA	NA	NA	NA	NA	NA	NA	NA	NA	NA	11.4	11.4	NA	NA	NA	NA	NA
Cao et al., 2024	10.1016/j.jclepro.2023.139916	Lab	Single Stage	Sequencing Batch Reactor (SBR)	SBR	2.5	Flocculent Sludge (FS)	FS	Beijing, China	0.558	0.005	Partial Denitrification (PD)	PD	0	Synthetic Wastewater	NA	0.00286567	0.00286567	0.573134	80	354.286	NA	NA	NA	NA	NA	NA	NA	NA	NA	NA	NA	NA	NA	NA	NA	NA	NA	NA	NA	NA	NA	12.3	12.3	NA	NA	NA	NA	NA
Cao et al., 2024	10.1016/j.jclepro.2023.139916	Lab	Single Stage	Sequencing Batch Reactor (SBR)	SBR	2.5	Flocculent Sludge (FS)	FS	Beijing, China	0.558	0.005	Partial Denitrification (PD)	PD	0	Synthetic Wastewater	NA	0.000358209	0.000358209	0.0716418	10	44.2857	NA	NA	NA	NA	NA	NA	NA	NA	NA	NA	NA	NA	NA	NA	NA	NA	NA	NA	NA	NA	NA	0.1	0.1	NA	NA	NA	NA	NA
Cao et al., 2024	10.1016/j.jclepro.2023.139916	Lab	Single Stage	Sequencing Batch Reactor (SBR)	SBR	2.5	Flocculent Sludge (FS)	FS	Beijing, China	0.558	0.005	Partial Denitrification (PD)	PD	0	Synthetic Wastewater	NA	0.000716418	0.000716418	0.143284	20	88.5714	NA	NA	NA	NA	NA	NA	NA	NA	NA	NA	NA	NA	NA	NA	NA	NA	NA	NA	NA	NA	NA	0.6	0.6	NA	NA	NA	NA	NA
Cao et al., 2024	10.1016/j.jclepro.2023.139916	Lab	Single Stage	Sequencing Batch Reactor (SBR)	SBR	2.5	Flocculent Sludge (FS)	FS	Beijing, China	0.558	0.005	Partial Denitrification (PD)	PD	0	Synthetic Wastewater	NA	0.00107463	0.00107463	0.214925	30	132.857	NA	NA	NA	NA	NA	NA	NA	NA	NA	NA	NA	NA	NA	NA	NA	NA	NA	NA	NA	NA	NA	9.4	9.4	NA	NA	NA	NA	NA
Cao et al., 2024	10.1016/j.jclepro.2023.139916	Lab	Single Stage	Sequencing Batch Reactor (SBR)	SBR	2.5	Flocculent Sludge (FS)	FS	Beijing, China	0.558	0.005	Partial Denitrification (PD)	PD	0	Synthetic Wastewater	NA	0.00197015	0.00197015	0.39403	55	243.571	NA	NA	NA	NA	NA	NA	NA	NA	NA	NA	NA	NA	NA	NA	NA	NA	NA	NA	NA	NA	NA	10.2	10.2	NA	NA	NA	NA	NA
Cao et al., 2024	10.1016/j.jclepro.2023.139916	Lab	Single Stage	Sequencing Batch Reactor (SBR)	SBR	2.5	Flocculent Sludge (FS)	FS	Beijing, China	0.558	0.005	Partial Denitrification (PD)	PD	0	Synthetic Wastewater	NA	0.00286567	0.00286567	0.573134	80	354.286	NA	NA	NA	NA	NA	NA	NA	NA	NA	NA	NA	NA	NA	NA	NA	NA	NA	NA	NA	NA	NA	9.5	9.5	NA	NA	NA	NA	NA
Christensson et al., 2013	10.2166/wst.2013.156	Full	Single Stage	Moving Bed Biofilm Reactor (MBBR)	MBBR	2.5	Biofilm (BF)	BF	Malm√∂, Sweden	0.022	200	Partial Nitrification / Anammox (PNA)	PNA	2.2	Reject Water	NA	200	200	1	NA	NA	NA	NA	NA	NA	NA	NA	855	1099.29	85.5	109.929	NA	NA	0.9	0.9	NA	NA	NA	NA	0.55	0.55	0.495	NA	NA	NA	NA	NA	NA	257
Christensson et al., 2013	10.2166/wst.2013.156	Full	Single Stage	Moving Bed Biofilm Reactor (MBBR)	MBBR	2.5	Biofilm (BF)	BF	VaÃàxjoÃà, Sweden	0.022	350	Partial Nitrification / Anammox (PNA)	PNA	2.2	Reject Water	NA	320	320	0.914286	NA	NA	NA	NA	NA	NA	NA	NA	1043	1341	166.88	214.56	NA	NA	0.84	0.84	NA	NA	NA	NA	2.15	2.15	1.806	NA	NA	NA	NA	NA	NA	NA
Christensson et al., 2013	10.2166/wst.2013.156	Full	Single Stage	Moving Bed Biofilm Reactor (MBBR)	MBBR	2.5	Biofilm (BF)	BF	VaÃàxjoÃà, Sweden	0.022	350	Partial Nitrification / Anammox (PNA)	PNA	2.2	Reject Water	NA	320	320	0.914286	NA	NA	NA	NA	NA	NA	NA	NA	1043	1341	166.88	214.56	NA	NA	0.84	0.84	NA	NA	NA	NA	0.06	0.06	0.0504	NA	NA	NA	NA	NA	NA	NA
Conan et al., 2018	10.1016/j.jclepro.2018.08.258	Lab	Aerated	Sequencing Batch Reactor (SBR)	SBR	2.5	Flocculent Sludge (FS)	FS	Brittany, France	0.048	0.002	Partial Nitrification (PN)	PN	3.43	Reject Water	NA	0.48	0.00096	0.48	0	0	4	17.7143	1	3.28571	562	1846.57	1167	1500.43	596	766.286	1168	1168	NA	0.0051	NA	NA	NA	NA	NA	2.4	1.4	NA	NA	NA	NA	NA	NA	NA
Conan et al., 2018	10.1016/j.jclepro.2018.08.258	Lab	Aerated	Sequencing Batch Reactor (SBR)	SBR	2.5	Flocculent Sludge (FS)	FS	Brittany, France	0.048	0.002	Partial Nitrification (PN)	PN	3.43	Reject Water	NA	0.9	0.0018	0.9	0	0	4	17.7143	0	0	542	1780.86	1147	1474.71	603	775.286	1147	1147	NA	0.5238	NA	NA	NA	NA	NA	2.1	1.1	NA	NA	NA	NA	NA	NA	NA
Conan et al., 2018	10.1016/j.jclepro.2018.08.258	Lab	Aerated	Sequencing Batch Reactor (SBR)	SBR	2.5	Flocculent Sludge (FS)	FS	Brittany, France	0.048	0.002	Partial Nitrification (PN)	PN	3.43	Reject Water	NA	1.33	0.00266	1.33	1	4.42857	2	8.85714	0	0	533	1751.29	1153	1482.43	612	786.857	1157.43	1157.43	NA	0.4615	NA	NA	NA	NA	NA	1.3	0.6	NA	NA	NA	NA	NA	NA	NA
Conan et al., 2018	10.1016/j.jclepro.2018.08.258	Lab	Non-aerated	Sequencing Batch Reactor (SBR)	SBR	2.5	Flocculent Sludge (FS)	FS	Brittany, France	0.048	0.002	Anammox (AMX)	AMX	0	Reject Water	NA	0.64	0.00128	0.64	2	8.85714	32	141.714	275	903.571	2	6.57143	246	316.286	32	41.1429	529.857	529.857	NA	0.8754	NA	NA	NA	NA	NA	0	0	NA	NA	NA	NA	NA	NA	NA
Conan et al., 2018	10.1016/j.jclepro.2018.08.258	Lab	Non-aerated	Sequencing Batch Reactor (SBR)	SBR	2.5	Flocculent Sludge (FS)	FS	Brittany, France	0.048	0.002	Anammox (AMX)	AMX	0	Reject Water	NA	0.76	0.00152	0.76	2	8.85714	56	248	476	1564	50	164.286	458	588.857	88	113.143	942.857	942.857	NA	0.7857	NA	NA	NA	NA	NA	1.4	1.1	NA	NA	NA	NA	NA	NA	NA
Conan et al., 2018	10.1016/j.jclepro.2018.08.258	Lab	Non-aerated	Sequencing Batch Reactor (SBR)	SBR	2.5	Flocculent Sludge (FS)	FS	Brittany, France	0.048	0.002	Anammox (AMX)	AMX	0	Reject Water	NA	0.51	0.00102	0.51	2	8.85714	35	155	246	808.286	3	9.85714	243	312.429	45	57.8571	497.857	497.857	NA	0.8	NA	NA	NA	NA	NA	0.5	0.4	NA	NA	NA	NA	NA	NA	NA
Conan et al., 2018	10.1016/j.jclepro.2018.08.258	Lab	Non-aerated	Sequencing Batch Reactor (SBR)	SBR	2.5	Flocculent Sludge (FS)	FS	Brittany, France	0.048	0.002	Anammox (AMX)	AMX	0	Reject Water	NA	0.61	0.00122	0.61	2	8.85714	31	137.286	296	972.571	22	72.2857	317	407.571	116	149.143	621.857	621.857	NA	0.6939	NA	NA	NA	NA	NA	4.9	3.4	NA	NA	NA	NA	NA	NA	NA
Conan et al., 2018	10.1016/j.jclepro.2018.08.258	Lab	Single Stage	Sequencing Batch Reactor (SBR)	SBR	2.5	Flocculent Sludge (FS)	FS	Brittany, France	0.048	0.002	Partial Nitrification / Anammox (PNA)	PNA	2.2	Reject Water	NA	0.33	0.00066	0.33	1	4.42857	26	115.143	1	3.28571	17	55.8571	459	590.143	47	60.4286	464.429	464.429	NA	0.8	NA	NA	NA	NA	NA	0.5	0.4	NA	NA	NA	NA	NA	NA	NA
Conan et al., 2018	10.1016/j.jclepro.2018.08.258	Lab	Single Stage	Sequencing Batch Reactor (SBR)	SBR	2.5	Flocculent Sludge (FS)	FS	Brittany, France	0.048	0.002	Partial Nitrification / Anammox (PNA)	PNA	2.2	Reject Water	NA	0.67	0.00134	0.67	2	8.85714	60	265.714	1	3.28571	23	75.5714	911	1171.29	142	182.571	920.857	920.857	NA	0.6667	NA	NA	NA	NA	NA	1.2	0.8	NA	NA	NA	NA	NA	NA	NA
Conan et al., 2018	10.1016/j.jclepro.2018.08.258	Lab	Single Stage	Sequencing Batch Reactor (SBR)	SBR	2.5	Flocculent Sludge (FS)	FS	Brittany, France	0.048	0.002	Partial Nitrification / Anammox (PNA)	PNA	2.2	Reject Water	NA	0.42	0.00084	0.42	2	8.85714	25	110.714	1	3.28571	18	59.1429	442	568.286	118	151.714	451.857	451.857	NA	0.6667	NA	NA	NA	NA	NA	1.8	1.2	NA	NA	NA	NA	NA	NA	NA
Conan et al., 2018	10.1016/j.jclepro.2018.08.258	Lab	Single Stage	Sequencing Batch Reactor (SBR)	SBR	2.5	Flocculent Sludge (FS)	FS	Brittany, France	0.048	0.002	Partial Nitrification / Anammox (PNA)	PNA	2.2	Reject Water	NA	0.34	0.00068	0.34	2	8.85714	21	93	3	9.85714	26	85.4286	461	592.714	86	110.571	472.857	472.857	NA	0.7302	NA	NA	NA	NA	NA	6.3	4.6	NA	NA	NA	NA	NA	NA	NA
Graaff et al., 2010	10.1016/j.watres.2009.12.039	Lab	Single Stage	Completely Stirred Tank Reactor (CSTR)	CSTR	2.5	Flocculent Sludge (FS)	FS	Leeuwarden, The Netherlands	0.442	0.0032	Partial Nitrification (PN)	PN	3.43	Black Water	NA	0.52	0.001664	0.52	0	0	0	0	0	0	0.5	1.64286	0.75	0.964286	0.25	0.321429	0.75	0.75	0.666667	0.6667	NA	NA	NA	NA	1.9	2.85	1.9	NA	NA	NA	NA	NA	NA	NA
Ganesa et al., 2019	10.1016/j.chemosphere.2019.02.104	Lab	Single Stage	Sequencing Batch Reactor (SBR)	SBR	2.5	Flocculent Sludge (FS)	FS	Penang, Malaysia	0.753	0.002	Anammox (AMX)	AMX	0	Synthetic Wastewater	NA	0.000206	0.000206	0.103	0	0	NA	NA	53	174.143	79.3478	35.9643	50	64.2857	80.0752	12.8088	103	103	0.786888	0.7869	NA	0.16603774 mg/L/h	NA	NA	3.86796	4.91551	3.86796	NA	NA	NA	NA	NA	NA	NA
Ganesa et al., 2019	10.1016/j.chemosphere.2019.02.104	Lab	Single Stage	Sequencing Batch Reactor (SBR)	SBR	2.5	Flocculent Sludge (FS)	FS	Penang, Malaysia	0.753	0.002	Anammox (AMX)	AMX	0	Synthetic Wastewater	5 mg/L hydrazine	0.000206	0.000206	0.103	0	0	NA	NA	53	174.143	85.1449	25.869	50	64.2857	85.7143	9.18367	103	103	0.846933	0.8469	NA	0.0641509	NA	NA	1.49478	1.76493	1.49478	NA	NA	NA	NA	NA	NA	NA
Ganesa et al., 2019	10.1016/j.chemosphere.2019.02.104	Lab	Single Stage	Sequencing Batch Reactor (SBR)	SBR	2.5	Flocculent Sludge (FS)	FS	Penang, Malaysia	0.753	0.002	Anammox (AMX)	AMX	0	Synthetic Wastewater	10 mg/L hydrazine	0.000206	0.000206	0.103	0	0	NA	NA	53	174.143	86.5942	23.3452	50	64.2857	87.9699	7.73362	103	103	0.866051	0.8661	NA	0.0377359	NA	NA	0.879282	1.01528	0.879282	NA	NA	NA	NA	NA	NA	NA
Ganesa et al., 2019	10.1016/j.chemosphere.2019.02.104	Lab	Single Stage	Sequencing Batch Reactor (SBR)	SBR	2.5	Flocculent Sludge (FS)	FS	Penang, Malaysia	0.753	0.002	Anammox (AMX)	AMX	0	Synthetic Wastewater	15 mg/L hydrazine	0.000206	0.000206	0.103	0	0	NA	NA	53	174.143	85.5072	25.2381	50	64.2857	86.8421	8.45865	103	103	0.85445	0.8545	NA	0.0754717	NA	NA	1.75856	2.05812	1.75856	NA	NA	NA	NA	NA	NA	NA
Ganesa et al., 2019	10.1016/j.chemosphere.2019.02.104	Lab	Single Stage	Sequencing Batch Reactor (SBR)	SBR	2.5	Flocculent Sludge (FS)	FS	Penang, Malaysia	0.753	0.002	Anammox (AMX)	AMX	0	Synthetic Wastewater	20 mg/L hydrazine	0.000206	0.000206	0.103	0	0	NA	NA	53	174.143	84.7826	26.5	50	64.2857	84.9624	9.66702	103	103	0.841241	0.8412	NA	0.126415	NA	NA	2.94559	3.50149	2.94559	NA	NA	NA	NA	NA	NA	NA
Fang et al., 2020	10.1016/j.jenvman.2020.110586	Lab	Single Stage	Expanded Granular Sludge Bed (EGSB)	EGSB	NA	Granular Sludge (GS)	GS	Chongqing, China	0.4743	0.005	Partial Nitrification / Anammox (PNA)	PNA	2.2	Synthetic Wastewater	NA	746 mgN/L/d	0.00373	0.746	NA	NA	NA	NA	NA	NA	NA	NA	127.886	127.886	93.8406	7.87702	99.4667	99.4667	77.5362	0.7754	NA	NA	NA	NA	5.90066	7.6102	5.90066	NA	NA	NA	NA	NA	NA	NA
Fang et al., 2020	10.1016/j.jenvman.2020.110586	Lab	Single Stage	Expanded Granular Sludge Bed (EGSB)	EGSB	NA	Granular Sludge (GS)	GS	Chongqing, China	0.4743	0.005	Partial Nitrification / Anammox (PNA)	PNA	2.2	Synthetic Wastewater	NA	1869	0.009345	1.869	NA	NA	NA	NA	NA	NA	NA	NA	130.162	130.162	93.1159	8.96046	101.237	101.237	75.7246	0.7572	NA	NA	NA	NA	7.09272	9.36646	7.09272	NA	NA	NA	NA	NA	NA	NA
Fang et al., 2020	10.1016/j.jenvman.2020.110586	Lab	Single Stage	Expanded Granular Sludge Bed (EGSB)	EGSB	NA	Granular Sludge (GS)	GS	Chongqing, China	0.4743	0.005	Partial Nitrification / Anammox (PNA)	PNA	2.2	Synthetic Wastewater	NA	2238	0.01119	2.238	NA	NA	NA	NA	NA	NA	NA	NA	131.882	131.882	93.4783	8.60101	102.575	102.575	75.3623	0.7536	NA	NA	NA	NA	7.80795	10.3605	7.80795	NA	NA	NA	NA	NA	NA	NA
Fang et al., 2020	10.1016/j.jenvman.2020.110586	Lab	Single Stage	Expanded Granular Sludge Bed (EGSB)	EGSB	NA	Granular Sludge (GS)	GS	Chongqing, China	0.4743	0.005	Partial Nitrification / Anammox (PNA)	PNA	2.2	Synthetic Wastewater	NA	2988	0.01494	2.988	NA	NA	NA	NA	NA	NA	NA	NA	128.057	128.057	94.5652	6.95963	99.6	99.6	74.6377	0.7464	NA	NA	NA	NA	8.64238	11.5791	8.64238	NA	NA	NA	NA	NA	NA	NA
Jia et al., 2018b	10.1039/c8ew00125a	Lab	Single Stage	Expanded Granular Sludge Bed (EGSB)	EGSB	NA	Granular Sludge (GS)	GS	Gent, Belgium	0.15	0.065	Anammox (AMX)	AMX	0	Synthetic Wastewater	NA	0.37	0.02405	0.37	0	0	NA	NA	400	1314.29	0.982	23.6571	350	450	0.914	38.7	750	750	0.861	0.861	NA	NA	NA	NA	0.13	0.150987	0.13	NA	NA	NA	NA	NA	NA	0
Jia et al., 2018b	10.1039/c8ew00125a	Lab	Single Stage	Expanded Granular Sludge Bed (EGSB)	EGSB	NA	Granular Sludge (GS)	GS	Gent, Belgium	0.15	0.065	Anammox (AMX)	AMX	0	Synthetic Wastewater	NA	0.4	0.026	0.4	0	0	NA	NA	200	657.143	0.986	3.23971	200	257.143	0.809	49.1143	400	400	0.8153	0.8153	NA	NA	NA	NA	0.17	0.208512	0.17	NA	NA	NA	NA	NA	NA	8
Jia et al., 2018b	10.1039/c8ew00125a	Lab	Single Stage	Expanded Granular Sludge Bed (EGSB)	EGSB	NA	Granular Sludge (GS)	GS	Gent, Belgium	0.15	0.065	Anammox (AMX)	AMX	0	Synthetic Wastewater	NA	0.4	0.026	0.4	0	0	NA	NA	200	657.143	2.528	8.30629	200	257.143	0.816	47.3143	400	400	0.824	0.824	NA	NA	NA	NA	0.46	0.558252	0.46	NA	NA	NA	NA	NA	NA	40
Jin et al., 2016	10.1186/s40064-016-2392-1	Lab	Single Stage	Expanded Granular Sludge Bed (EGSB)	EGSB	NA	Granular Sludge (GS)	GS	Guilin, China	0.5154	0.01	Anammox (AMX)	AMX	0	Synthetic Wastewater	NA	0.00196251	0.00196251	0.196251	7.9984	35.4215	NA	NA	28.973	95.1969	NA	NA	28.4456	36.5729	NA	NA	NA	65.417	0.81	0.81	NA	NA	NA	NA	NA	0.553271	0.44815	NA	NA	NA	NA	NA	NA	NA
Jin et al., 2016	10.1186/s40064-016-2392-1	Lab	Single Stage	Expanded Granular Sludge Bed (EGSB)	EGSB	NA	Granular Sludge (GS)	GS	Guilin, China	0.5154	0.01	Anammox (AMX)	AMX	0	Synthetic Wastewater	NA	0.00195361	0.00195361	0.195361	6.63765	29.3953	NA	NA	29.4929	96.9054	NA	NA	28.9896	37.2724	NA	NA	NA	65.1202	0.81	0.81	NA	NA	NA	NA	NA	0.598131	0.484486	NA	NA	NA	NA	NA	NA	NA
Jin et al., 2016	10.1186/s40064-016-2392-1	Lab	Single Stage	Expanded Granular Sludge Bed (EGSB)	EGSB	NA	Granular Sludge (GS)	GS	Guilin, China	0.5154	0.01	Anammox (AMX)	AMX	0	Synthetic Wastewater	NA	0.00190787	0.00190787	0.190787	6.31586	27.9703	NA	NA	29.5595	97.1242	NA	NA	27.7202	35.6403	NA	NA	NA	63.5956	0.81	0.81	NA	NA	NA	NA	NA	0.642991	0.520822	NA	NA	NA	NA	NA	NA	NA
Jin et al., 2016	10.1186/s40064-016-2392-1	Lab	Single Stage	Expanded Granular Sludge Bed (EGSB)	EGSB	NA	Granular Sludge (GS)	GS	Guilin, China	0.5154	0.01	Anammox (AMX)	AMX	0	Synthetic Wastewater	NA	0.00263654	0.00263654	0.263654	7.67695	33.9979	NA	NA	43.8736	144.156	NA	NA	36.3342	46.7154	NA	NA	NA	87.8848	0.81	0.81	NA	NA	NA	NA	NA	0.650467	0.526879	NA	NA	NA	NA	NA	NA	NA
Jin et al., 2016	10.1186/s40064-016-2392-1	Lab	Single Stage	Expanded Granular Sludge Bed (EGSB)	EGSB	NA	Granular Sludge (GS)	GS	Guilin, China	0.5154	0.01	Anammox (AMX)	AMX	0	Synthetic Wastewater	NA	0.0027097	0.0027097	0.27097	8.24867	36.5298	NA	NA	44.199	145.225	NA	NA	37.8756	48.6973	NA	NA	NA	90.3233	0.81	0.81	NA	NA	NA	NA	NA	0.695327	0.563215	NA	NA	NA	NA	NA	NA	NA
Jin et al., 2016	10.1186/s40064-016-2392-1	Lab	Single Stage	Expanded Granular Sludge Bed (EGSB)	EGSB	NA	Granular Sludge (GS)	GS	Guilin, China	0.5154	0.01	Anammox (AMX)	AMX	0	Synthetic Wastewater	NA	0.00281344	0.00281344	0.281344	9.56835	42.3741	NA	NA	45.4307	149.272	NA	NA	38.7824	49.8631	NA	NA	NA	93.7815	0.81	0.81	NA	NA	NA	NA	NA	0.725234	0.587439	NA	NA	NA	NA	NA	NA	NA
Jin et al., 2016	10.1186/s40064-016-2392-1	Lab	Single Stage	Expanded Granular Sludge Bed (EGSB)	EGSB	NA	Granular Sludge (GS)	GS	Guilin, China	0.5154	0.01	Anammox (AMX)	AMX	0	Synthetic Wastewater	NA	0.00284765	0.00284765	0.284765	8.71771	38.607	NA	NA	43.8852	144.194	NA	NA	42.3187	54.4097	NA	NA	NA	94.9215	0.81	0.81	NA	NA	NA	NA	NA	0.927103	0.750953	NA	NA	NA	NA	NA	NA	NA
Jin et al., 2016	10.1186/s40064-016-2392-1	Lab	Single Stage	Expanded Granular Sludge Bed (EGSB)	EGSB	NA	Granular Sludge (GS)	GS	Guilin, China	0.5154	0.01	Anammox (AMX)	AMX	0	Synthetic Wastewater	NA	0.00316567	0.00316567	0.316567	7.74434	34.2964	NA	NA	40.8609	134.257	NA	NA	56.9171	73.1791	NA	NA	NA	105.522	0.81	0.81	NA	NA	NA	NA	NA	1.42804	1.15671	NA	NA	NA	NA	NA	NA	NA
Juan-D√≠az et al., 2022	10.1016/j.cej.2021.134087	Lab	Single Stage	Upflow Anaerobic Sludge Blanket (UASB)	UASB	NA	Granular Sludge (GS)	GS	Catalonia, NE Spain	0.14	0.012	Simultaneous partial Nitrification, ANAMMOX and Denitrification (SNAD)	SNAD	2.2	Domestic Wastewater	NA	0.17 g/L/d	0.00204	0.17	NA	NA	3	13.2857	NA	NA	1	3.28571	NA	NA	2	2.57143	5	5	0.92	0.92	NA	0.00723077	NA	NA	0.00460784	0.00500853	0.00460784	NA	NA	NA	NA	NA	NA	40
Juan-D√≠az et al., 2022	10.1016/j.cej.2021.134087	Lab	Single Stage	Upflow Anaerobic Sludge Blanket (UASB)	UASB	NA	Granular Sludge (GS)	GS	Catalonia, NE Spain	0.14	0.012	Simultaneous partial Nitrification, ANAMMOX and Denitrification (SNAD)	SNAD	2.2	Domestic Wastewater	NA	0.15	0.0018	0.15	NA	NA	7	31	NA	NA	3	9.85714	NA	NA	4	5.14286	13	13	0.79	0.79	NA	0.00455385	NA	NA	0.00328889	0.00416315	0.00328889	NA	NA	NA	NA	NA	NA	40
Juan-D√≠az et al., 2022	10.1016/j.cej.2021.134087	Lab	Single Stage	Upflow Anaerobic Sludge Blanket (UASB)	UASB	NA	Granular Sludge (GS)	GS	Catalonia, NE Spain	0.14	0.012	Simultaneous partial Nitrification, ANAMMOX and Denitrification (SNAD)	SNAD	2.2	Domestic Wastewater	NA	0.14	0.00168	0.14	NA	NA	2	8.85714	NA	NA	2	6.57143	NA	NA	5	6.42857	8	8	0.88	0.88	NA	0.00215385	NA	NA	0.00166667	0.00189394	0.00166667	NA	NA	NA	NA	NA	NA	40
Kanders et al., 2019	10.2166/wst.2019.163	Full	Single Stage	Moving Bed Biofilm Reactor (MBBR)	MBBR	2.5	Flocculent Sludge (FS)	FS	NorrkoÃàping, Sweden	0.008	1000	Partial Nitrification / Anammox (PNA)	PNA	2.2	Reject Water	Intermittant Aeration	195	195	0.195	NA	NA	257	257	NA	NA	3.9	3.9	941	941	154	154	941	941	0.67	0.67	NA	0.71	NA	NA	0.71	1.0597	0.71	NA	NA	NA	NA	NA	NA	NA
Kanders et al., 2019	10.2166/wst.2019.163	Full	Single Stage	Moving Bed Biofilm Reactor (MBBR)	MBBR	2.5	Flocculent Sludge (FS)	FS	NorrkoÃàping, Sweden	0.008	1000	Partial Nitrification / Anammox (PNA)	PNA	2.2	Reject Water	Intermittant Aeration	210	210	0.21	NA	NA	330	330	NA	NA	3.8	3.8	894	894	247	247	894	894	0.5	0.5	NA	0.71	NA	NA	0.71	1.42	0.71	NA	NA	NA	NA	NA	NA	NA
Kanders et al., 2019	10.2166/wst.2019.163	Full	Single Stage	Moving Bed Biofilm Reactor (MBBR)	MBBR	2.5	Flocculent Sludge (FS)	FS	NorrkoÃàping, Sweden	0.008	1000	Partial Nitrification / Anammox (PNA)	PNA	2.2	Reject Water	Intermittant Aeration	155	155	0.155	NA	NA	73	73	NA	NA	1.8	1.8	1022	1022	124	124	1022	1022	0.86	0.86	NA	0.14	NA	NA	0.14	0.162791	0.14	NA	NA	NA	NA	NA	NA	NA
Kong et al., 2015	10.1007/s12205-014-0035-z	Lab	Single Stage	Sequencing Batch Biofilm Reactor (SBBR)	SBBR	2.5	Biofilm (BF)	BF	Shandong, China	0.6838	0.006	Partial Nitrification (PN)	PN	3.43	Synthetic Wastewater	NA	0.0012	0.0012	0.2	0	0	9.3	41.1857	0	0	76.6	251.686	200	257.143	0.558	113.657	200	200	0.558	0.558	NA	1.2	NA	NA	1.2	2.15054	1.2	NA	NA	NA	NA	NA	NA	NA
Kong et al., 2015	10.1007/s12205-014-0035-z	Lab	Single Stage	Sequencing Batch Biofilm Reactor (SBBR)	SBBR	2.5	Biofilm (BF)	BF	Shandong, China	0.6838	0.006	Partial Nitrification (PN)	PN	3.43	Synthetic Wastewater	NA	0.0018	0.0018	0.3	0	0	15.4	68.2	0	0	79.6	261.543	300	385.714	0.43	219.857	300	300	0.43	0.43	NA	1.3	NA	NA	1.3	3.02326	1.3	NA	NA	NA	NA	NA	NA	NA
Kong et al., 2015	10.1007/s12205-014-0035-z	Lab	Single Stage	Sequencing Batch Biofilm Reactor (SBBR)	SBBR	2.5	Biofilm (BF)	BF	Shandong, China	0.6838	0.006	Partial Nitrification (PN)	PN	3.43	Synthetic Wastewater	NA	0.0024	0.0024	0.4	0	0	19.5	86.3571	0	0	86.3	283.557	400	514.286	0.383	317.314	400	400	0.383	0.383	NA	1	NA	NA	1	2.61097	1	NA	NA	NA	NA	NA	NA	NA
Kong et al., 2015	10.1007/s12205-014-0035-z	Lab	Single Stage	Sequencing Batch Biofilm Reactor (SBBR)	SBBR	2.5	Biofilm (BF)	BF	Shandong, China	0.6838	0.006	Partial Nitrification (PN)	PN	3.43	Synthetic Wastewater	2% NaCl	0.0012	0.0012	0.2	0	0	11.5	50.9286	0	0	74.3	244.129	200	257.143	0.578	108.514	200	200	0.578	0.578	NA	1.5	NA	NA	1.5	2.59516	1.5	NA	NA	NA	NA	NA	NA	NA
Kong et al., 2015	10.1007/s12205-014-0035-z	Lab	Single Stage	Sequencing Batch Biofilm Reactor (SBBR)	SBBR	2.5	Biofilm (BF)	BF	Shandong, China	0.6838	0.006	Partial Nitrification (PN)	PN	3.43	Synthetic Wastewater	4% NaCl	0.0012	0.0012	0.2	0	0	12.5	55.3571	0	0	71.2	233.943	200	257.143	0.568	111.086	200	200	0.568	0.568	NA	1.6	NA	NA	1.6	2.8169	1.6	NA	NA	NA	NA	NA	NA	NA
Kong et al., 2015	10.1007/s12205-014-0035-z	Lab	Single Stage	Sequencing Batch Biofilm Reactor (SBBR)	SBBR	2.5	Biofilm (BF)	BF	Shandong, China	0.6838	0.006	Partial Nitrification (PN)	PN	3.43	Synthetic Wastewater	6% NaCl	0.0012	0.0012	0.2	0	0	11.7	51.8143	0	0	69.4	228.029	200	257.143	0.582	107.486	200	200	0.582	0.582	NA	1.8	NA	NA	1.8	3.09278	1.8	NA	NA	NA	NA	NA	NA	NA
Kong et al., 2015	10.1007/s12205-014-0035-z	Lab	Single Stage	Sequencing Batch Biofilm Reactor (SBBR)	SBBR	2.5	Biofilm (BF)	BF	Shandong, China	0.6838	0.006	Partial Nitrification (PN)	PN	3.43	Synthetic Wastewater	8% NaCl	0.0012	0.0012	0.2	0	0	10.2	45.1714	0	0	67.4	221.457	200	257.143	0.571	110.314	200	200	0.571	0.571	NA	1.9	NA	NA	1.9	3.3275	1.9	NA	NA	NA	NA	NA	NA	NA
Lang et al., 2022	10.1016/j.biteb.2022.101224	Lab	Single Stage	Sequencing Batch Reactor (SBR)	SBR	2.5	Flocculent Sludge (FS)	FS	Toulouse, France	0.048	0.011	Partial Nitrification / Anammox (PNA)	PNA	2.2	Synthetic Wastewater	NA	0.001	0.001	0.0909091	0	0	112.15	496.662	0	0	14.0187	46.0614	500	500	5.60748	7.20961	500	500	0.736449	0.7364	NA	1.90654	NA	NA	1.90654	2.58883	1.90654	NA	NA	NA	NA	NA	NA	NA
Lang et al., 2022	10.1016/j.biteb.2022.101224	Lab	Single Stage	Sequencing Batch Reactor (SBR)	SBR	2.5	Flocculent Sludge (FS)	FS	Toulouse, France	0.048	0.011	Partial Nitrification / Anammox (PNA)	PNA	2.2	Synthetic Wastewater	NA	0.001	0.001	0.0909091	0	0	120.561	533.912	0	0	100.935	331.642	500	500	2.80374	3.60481	500	500	0.551402	0.5514	NA	3.70093	NA	NA	3.70093	6.71186	3.70093	NA	NA	NA	NA	NA	NA	NA
Lang et al., 2022	10.1016/j.biteb.2022.101224	Lab	Single Stage	Sequencing Batch Reactor (SBR)	SBR	2.5	Flocculent Sludge (FS)	FS	Toulouse, France	0.048	0.011	Partial Nitrification / Anammox (PNA)	PNA	2.2	Synthetic Wastewater	NA	0.001	0.001	0.0909091	0	0	70.0935	310.414	0	0	42.0561	138.184	500	500	2.80374	3.60481	500	500	0.770093	0.7701	NA	5.68224	NA	NA	5.68224	7.37864	5.68224	NA	NA	NA	NA	NA	NA	NA
Lang et al., 2022	10.1016/j.biteb.2022.101224	Lab	Single Stage	Sequencing Batch Reactor (SBR)	SBR	2.5	Flocculent Sludge (FS)	FS	Toulouse, France	0.048	0.011	Partial Nitrification / Anammox (PNA)	PNA	2.2	Synthetic Wastewater	NA	0.001	0.001	0.0909091	0	0	86.9159	384.913	0	0	33.6449	110.547	500	500	0	0	500	500	0.758879	0.7589	NA	2.16822	NA	NA	2.16822	2.85714	2.16822	NA	NA	NA	NA	NA	NA	NA
Yang et al., 2016	10.2166/wst.2016.454	Full	Single Stage	Moving Bed Biofilm Reactor (MBBR)	MBBR	2.5	Biofilm (BF)	BF	Stockholm, Sweden	0.022	700	Partial Nitrification / Anammox (PNA)	PNA	2.2	Reject Water	Intermittent Areation	189.966	189.966	0.27138	NA	NA	NA	NA	NA	NA	NA	NA	1476	1897.71	NA	NA	NA	NA	138.937	0.7314	NA	NA	NA	NA	NA	0.985194	0.720548	NA	NA	NA	NA	NA	NA	NA
Yang et al., 2016	10.2166/wst.2016.454	Full	Single Stage	Moving Bed Biofilm Reactor (MBBR)	MBBR	2.5	Biofilm (BF)	BF	Stockholm, Sweden	0.022	700	Partial Nitrification / Anammox (PNA)	PNA	2.2	Reject Water	Intermittent Areation	198.113	198.113	0.283019	NA	NA	NA	NA	NA	NA	NA	NA	1476	1897.71	NA	NA	NA	NA	156.089	0.7879	NA	NA	NA	NA	NA	0.685037	0.539726	NA	NA	NA	NA	NA	NA	NA
Yang et al., 2016	10.2166/wst.2016.454	Full	Single Stage	Moving Bed Biofilm Reactor (MBBR)	MBBR	2.5	Biofilm (BF)	BF	Stockholm, Sweden	0.022	700	Partial Nitrification / Anammox (PNA)	PNA	2.2	Reject Water	Intermittent Areation	180.961	180.961	0.258515	NA	NA	NA	NA	NA	NA	NA	NA	1476	1897.71	NA	NA	NA	NA	144.94	0.8009	NA	NA	NA	NA	NA	0.831207	0.665753	NA	NA	NA	NA	NA	NA	NA
Yang et al., 2016	10.2166/wst.2016.454	Full	Single Stage	Moving Bed Biofilm Reactor (MBBR)	MBBR	2.5	Biofilm (BF)	BF	Stockholm, Sweden	0.022	700	Partial Nitrification / Anammox (PNA)	PNA	2.2	Reject Water	Intermittent Areation	193.825	193.825	0.276893	NA	NA	NA	NA	NA	NA	NA	NA	1476	1897.71	NA	NA	NA	NA	178.816	0.9226	NA	NA	NA	NA	NA	1.0483	0.967123	NA	NA	NA	NA	NA	NA	NA
Yang et al., 2016	10.2166/wst.2016.454	Pilot	Single Stage	Moving Bed Biofilm Reactor (MBBR)	MBBR	2.5	Biofilm (BF)	BF	Stockholm, Sweden	0.022	0.2	Partial Nitrification / Anammox (PNA)	PNA	2.2	Reject Water	Intermittent Areation	80L biofilm carrier, 500m2/m3, 1.7 gN/m2/d	0.68	3.4	NA	NA	NA	NA	NA	NA	NA	NA	977	1256.14	NA	NA	NA	NA	0.883	0.883	NA	NA	NA	NA	NA	0.577576	0.51	NA	NA	NA	NA	NA	NA	681
Yang et al., 2016	10.2166/wst.2016.454	Pilot	Single Stage	Moving Bed Biofilm Reactor (MBBR)	MBBR	2.5	Biofilm (BF)	BF	Stockholm, Sweden	0.022	0.2	Partial Nitrification / Anammox (PNA)	PNA	2.2	Reject Water	Intermittent Areation	80L biofilm carrier, 500m2/m3, 2.5 gN/m2/d	1	5	NA	NA	NA	NA	NA	NA	NA	NA	977	1256.14	NA	NA	NA	NA	0.802	0.802	NA	NA	NA	NA	NA	1.60848	1.29	NA	NA	NA	NA	NA	NA	681
Yang et al., 2016	10.2166/wst.2016.454	Pilot	Single Stage	Moving Bed Biofilm Reactor (MBBR)	MBBR	2.5	Biofilm (BF)	BF	Stockholm, Sweden	0.022	0.2	Partial Nitrification / Anammox (PNA)	PNA	2.2	Reject Water	Intermittent Areation	80L biofilm carrier, 500m2/m5, 3.3 gN/m2/d	1.32	6.6	NA	NA	NA	NA	NA	NA	NA	NA	977	1256.14	NA	NA	NA	NA	0.768	0.768	NA	NA	NA	NA	NA	1.45833	1.12	NA	NA	NA	NA	NA	NA	681
Yang et al., 2013	10.2166/wst.2013.232	Pilot	Single Stage	Moving Bed Biofilm Reactor (MBBR)	MBBR	2.5	Biofilm (BF)	BF	Stockholm, Sweden	0.022	0.2	Partial Nitrification / Anammox (PNA)	PNA	2.2	Reject Water	Intermittent Areation	2.3	0.92	4.6	1.84	8.14857	NA	NA	0.04	0.131429	NA	NA	977.1	1256.27	NA	NA	978.98	NA	0.82	0.82	NA	NA	NA	NA	0.65	0.792683	0.65	NA	NA	NA	NA	NA	NA	681
Yang et al., 2013	10.2166/wst.2013.232	Pilot	Single Stage	Moving Bed Biofilm Reactor (MBBR)	MBBR	2.5	Biofilm (BF)	BF	Stockholm, Sweden	0.022	0.2	Partial Nitrification / Anammox (PNA)	PNA	2.2	Reject Water	Intermittent Areation	2.8	1.12	5.6	1.84	8.14857	NA	NA	0.04	0.131429	NA	NA	977.1	1256.27	NA	NA	978.98	NA	0.82	0.82	NA	NA	NA	NA	1.7	2.07317	1.7	NA	NA	NA	NA	NA	NA	681
Yang et al., 2013	10.2166/wst.2013.232	Pilot	Single Stage	Moving Bed Biofilm Reactor (MBBR)	MBBR	2.5	Biofilm (BF)	BF	Stockholm, Sweden	0.022	0.2	Partial Nitrification / Anammox (PNA)	PNA	2.2	Reject Water	NA	2.1	0.84	4.2	1.84	8.14857	NA	NA	0.04	0.131429	NA	NA	977.1	1256.27	NA	NA	978.98	NA	0.82	0.82	NA	NA	NA	NA	0.4	0.487805	0.4	NA	NA	NA	NA	NA	NA	681
Yang et al., 2013	10.2166/wst.2013.232	Pilot	Single Stage	Moving Bed Biofilm Reactor (MBBR)	MBBR	2.5	Biofilm (BF)	BF	Stockholm, Sweden	0.022	0.2	Partial Nitrification / Anammox (PNA)	PNA	2.2	Reject Water	NA	2.1	0.84	4.2	1.84	8.14857	NA	NA	0.04	0.131429	NA	NA	977.1	1256.27	NA	NA	978.98	NA	0.82	0.82	NA	NA	NA	NA	1.6	1.95122	1.6	NA	NA	NA	NA	NA	NA	681
Yang et al., 2013	10.2166/wst.2013.232	Pilot	Single Stage	Moving Bed Biofilm Reactor (MBBR)	MBBR	2.5	Biofilm (BF)	BF	Stockholm, Sweden	0.022	0.2	Partial Nitrification / Anammox (PNA)	PNA	2.2	Reject Water	Intermittent Areation	1.7	0.68	3.4	1.84	8.14857	61.5	272.357	0.04	0.131429	6.1	20.0429	977.1	1256.27	25.3	32.5286	978.98	NA	0.883	0.883	NA	NA	NA	NA	0.51	0.577576	0.51	NA	NA	NA	NA	NA	NA	681
Yang et al., 2013	10.2166/wst.2013.232	Pilot	Single Stage	Moving Bed Biofilm Reactor (MBBR)	MBBR	2.5	Biofilm (BF)	BF	Stockholm, Sweden	0.022	0.2	Partial Nitrification / Anammox (PNA)	PNA	2.2	Reject Water	Intermittent Areation	2.5	1	5	1.84	8.14857	54.7	242.243	0.04	0.131429	6.12	20.1086	977.1	1256.27	95.5	122.786	978.98	NA	0.802	0.802	NA	NA	NA	NA	1.29	1.60848	1.29	NA	NA	NA	NA	NA	NA	681
Yang et al., 2013	10.2166/wst.2013.232	Pilot	Single Stage	Moving Bed Biofilm Reactor (MBBR)	MBBR	2.5	Biofilm (BF)	BF	Stockholm, Sweden	0.022	0.2	Partial Nitrification / Anammox (PNA)	PNA	2.2	Reject Water	Intermittent Areation	3.3	1.32	6.6	1.84	8.14857	48.4	214.343	0.04	0.131429	6.67	21.9157	977.1	1256.27	126.6	162.771	978.98	NA	0.768	0.768	NA	NA	NA	NA	1.12	1.45833	1.12	NA	NA	NA	NA	NA	NA	681
Yang et al., 2013	10.2166/wst.2013.232	Pilot	Single Stage	Moving Bed Biofilm Reactor (MBBR)	MBBR	2.5	Biofilm (BF)	BF	Stockholm, Sweden	0.022	0.2	Partial Nitrification / Anammox (PNA)	PNA	2.2	Reject Water	Intermittent Areation	1.5	0.6	3	1.84	8.14857	130.8	579.257	0.04	0.131429	7.6	24.9714	977.1	1256.27	27.5	35.3571	978.98	NA	0.801	0.801	NA	NA	NA	NA	0.64	0.799001	0.64	NA	NA	NA	NA	NA	NA	681
Yang et al., 2013	10.2166/wst.2013.232	Pilot	Single Stage	Moving Bed Biofilm Reactor (MBBR)	MBBR	2.5	Biofilm (BF)	BF	Stockholm, Sweden	0.022	0.2	Partial Nitrification / Anammox (PNA)	PNA	2.2	Reject Water	Intermittent Areation	2.3	0.92	4.6	1.84	8.14857	86.2	381.743	0.04	0.131429	6.5	21.3571	977.1	1256.27	74.4	95.6571	978.98	NA	0.761	0.761	NA	NA	NA	NA	1.16	1.52431	1.16	NA	NA	NA	NA	NA	NA	681
Yang et al., 2013	10.2166/wst.2013.232	Pilot	Single Stage	Moving Bed Biofilm Reactor (MBBR)	MBBR	2.5	Biofilm (BF)	BF	Stockholm, Sweden	0.022	0.2	Partial Nitrification / Anammox (PNA)	PNA	2.2	Reject Water	Intermittent Areation	3.1	1.24	6.2	1.84	8.14857	72.5	321.071	0.04	0.131429	4.4	14.4571	977.1	1256.27	87.1	111.986	978.98	NA	0.815	0.815	NA	NA	NA	NA	1.11	1.36196	1.11	NA	NA	NA	NA	NA	NA	681
Yang et al., 2013	10.2166/wst.2013.232	Pilot	Single Stage	Moving Bed Biofilm Reactor (MBBR)	MBBR	2.5	Biofilm (BF)	BF	Stockholm, Sweden	0.022	0.2	Partial Nitrification / Anammox (PNA)	PNA	2.2	Reject Water	Intermittent Areation	3.7	1.48	7.4	1.84	8.14857	89.5	396.357	0.04	0.131429	7.71	25.3329	977.1	1256.27	60.2	77.4	978.98	NA	0.798	0.798	NA	NA	NA	NA	0.8	1.00251	0.8	NA	NA	NA	NA	NA	NA	681
Liu et al., 2019	10.1016/j.watres.2019.115057	Lab	Single Stage	Membrane Biofilm Reactor (MBfR)	MBfR	NA	Biofilm (BF)	BF	Queensland, Australia	0.81	6e-05	Partial Nitritation, Anammox and Methane-dependent nitrite/nitrate reduction reactions (PNAM)	PNAM	2.2	Synthetic Wastewater	NA	1.5 kgN/m3/d	9e-05	1.5	0	0	10	44.2857	0	0	NA	NA	1030	1324.29	NA	NA	1030	1030	0.98	0.98	NA	NA	NA	NA	0.34	0.346939	0.34	NA	NA	NA	NA	NA	NA	NA
Wang et al., 2016	10.1016/j.procbio.2016.02.001	Lab	Single Stage	Membrane Bioreactor (MBR)	MBR	4.26	Flocculent Sludge (FS)	FS	Dalian, China	0.5876	0.0045	Simultaneous partial Nitrification, ANAMMOX and Denitrification (SNAD)	SNAD	2.2	Synthetic Wastewater	Intermittent Areation	0.00194458	0.00194458	0.43213	0	0	9.74729	43.1666	0	0	6.49819	21.3512	288.087	370.397	0	0	288.087	288.087	0.921	0.921	NA	NA	NA	NA	2	2.17155	2	NA	NA	NA	NA	NA	NA	150.542
Ma et al., 2013	10.1016/j.biortech.2012.11.025	Lab	Single Stage	Upflow Anaerobic Sludge Blanket (UASB)	UASB	NA	Granular Sludge (GS)	GS	Beijing, China	0.5688	0.008	Anammox (AMX)	AMX	0	Domestic Wastewater	NA	NRR = 5.72kgN/m3/d	0.0745342	9.31678	12.5247	55.4664	13.7489	60.8879	15.9865	52.527	0.977477	3.21171	19.6502	25.2646	1.63229	2.09865	48.1614	48.1614	0.6139	0.6139	NA	NA	NA	NA	0.006	0.00977284	0.006	NA	NA	NA	NA	NA	NA	NA
Mi et al., 2017	10.2166/wst.2017.517	Lab	Single Stage	Continuous-Flow Biofilm Reactor (CFBR)	CFBR	2.5	Biofilm (BF)	BF	Shaanxi, China	0.6336	0.007	Partial Nitrification / Anammox (PNA)	PNA	2.2	Synthetic Wastewater	NA	0.57	0.00399	0.57	0	0	32.22	32.22	0	0	51.0968	167.889	210	210	187	23	163.333	163.333	0.8103	0.8103	NA	NA	NA	NA	2.17687	2.6865	2.17687	NA	NA	NA	NA	NA	NA	NA
Mi et al., 2017	10.2166/wst.2017.517	Lab	Single Stage	Continuous-Flow Biofilm Reactor (CFBR)	CFBR	2.5	Biofilm (BF)	BF	Shaanxi, China	0.6336	0.007	Partial Nitrification / Anammox (PNA)	PNA	2.2	Synthetic Wastewater	NA	0.38	0.00266	0.38	0	0	16.27	16.27	0	0	20.9032	68.682	136	136	119.87	16.13	105.778	105.778	0.8527	0.8527	NA	NA	NA	NA	2.84014	3.33076	2.84014	NA	NA	NA	NA	NA	NA	NA
Mi et al., 2017	10.2166/wst.2017.517	Lab	Single Stage	Continuous-Flow Biofilm Reactor (CFBR)	CFBR	2.5	Biofilm (BF)	BF	Shaanxi, China	0.6336	0.007	Partial Nitrification / Anammox (PNA)	PNA	2.2	Synthetic Wastewater	NA	0.26	0.00182	0.26	0	0	10.79	10.79	0	0	15.4839	50.8756	100	100	80.94	19.06	77.7778	77.7778	0.8388	0.8388	NA	NA	NA	NA	2.85714	3.40623	2.85714	NA	NA	NA	NA	NA	NA	NA
Mi et al., 2017	10.2166/wst.2017.517	Lab	Single Stage	Continuous-Flow Biofilm Reactor (CFBR)	CFBR	2.5	Biofilm (BF)	BF	Shaanxi, China	0.6336	0.007	Partial Nitrification / Anammox (PNA)	PNA	2.2	Synthetic Wastewater	NA	0.19	0.00133	0.19	0	0	8.1	8.1	0	0	5.41935	17.8065	70	70	53.16	16.84	54.4444	54.4444	0.8491	0.8491	NA	NA	NA	NA	3.28231	3.86564	3.28231	NA	NA	NA	NA	NA	NA	NA
Mi et al., 2017	10.2166/wst.2017.517	Lab	Single Stage	Continuous-Flow Biofilm Reactor (CFBR)	CFBR	2.5	Biofilm (BF)	BF	Shaanxi, China	0.6336	0.007	Partial Nitrification / Anammox (PNA)	PNA	2.2	Synthetic Wastewater	NA	0.13	0.00091	0.13	0	0	6.12	6.12	0	0	10.8387	35.6129	50	50	44.5	5.5	38.8889	38.8889	0.8572	0.8572	NA	NA	NA	NA	4.5068	5.25759	4.5068	NA	NA	NA	NA	NA	NA	NA
Mi et al., 2017	10.2166/wst.2017.517	Lab	Single Stage	Continuous-Flow Biofilm Reactor (CFBR)	CFBR	2.5	Biofilm (BF)	BF	Shaanxi, China	0.6336	0.007	Partial Nitrification / Anammox (PNA)	PNA	2.2	Synthetic Wastewater	NA	0.11	0.00077	0.11	0	0	4.16	4.16	0	0	7.74194	25.4378	30	30	28.14	1.86	23.3333	23.3333	0.8465	0.8465	NA	NA	NA	NA	6.0034	7.09203	6.0034	NA	NA	NA	NA	NA	NA	NA
Mi et al., 2017	10.2166/wst.2017.517	Lab	Single Stage	Continuous-Flow Biofilm Reactor (CFBR)	CFBR	2.5	Biofilm (BF)	BF	Shaanxi, China	0.6336	0.007	Partial Nitrification / Anammox (PNA)	PNA	2.2	Synthetic Wastewater	NA	0.16	0.00112	0.16	0	0	4.33	4.33	0	0	5.41935	17.8065	30	30	26.54	3.46	23.3333	23.3333	0.8693	0.8693	NA	NA	NA	NA	5.15306	5.92783	5.15306	NA	NA	NA	NA	NA	NA	NA
Mi et al., 2017	10.2166/wst.2017.517	Lab	Single Stage	Continuous-Flow Biofilm Reactor (CFBR)	CFBR	2.5	Biofilm (BF)	BF	Shaanxi, China	0.6336	0.007	Partial Nitrification / Anammox (PNA)	PNA	2.2	Synthetic Wastewater	NA	0.32	0.00224	0.32	0	0	3.08	3.08	0	0	5.41935	17.8065	30	30	29.04	0.96	23.3333	23.3333	0.8448	0.8448	NA	NA	NA	NA	3.84354	4.54964	3.84354	NA	NA	NA	NA	NA	NA	NA
Panwivia et al., 2014	10.1080/10934529.2014.882674	Lab	Single Stage	Sequencing Batch Reactor (SBR)	SBR	2.5	Flocculent Sludge (FS)	FS	Bangkok, Thailand	0.4394	0.003	Anammox (AMX)	AMX	0	Synthetic Wastewater	NA	0.000309	0.000309	0.103	0	0	NA	NA	103	338.429	NA	NA	103	132.429	NA	NA	206	206	NA	NA	NA	NA	NA	NA	0.02	NA	0.02	NA	NA	NA	NA	NA	NA	NA
Panwivia et al., 2014	10.1080/10934529.2014.882674	Lab	Single Stage	Sequencing Batch Reactor (SBR)	SBR	2.5	Flocculent Sludge (FS)	FS	Bangkok, Thailand	0.4394	0.003	Anammox (AMX)	AMX	0	Synthetic Wastewater	NA	0.0007245	0.0007245	0.2415	0	0	NA	NA	273	897	NA	NA	210	270	NA	NA	483	483	NA	NA	NA	NA	NA	NA	0.025	NA	0.025	NA	NA	NA	NA	NA	NA	NA
Panwivia et al., 2014	10.1080/10934529.2014.882674	Lab	Single Stage	Sequencing Batch Reactor (SBR)	SBR	2.5	Flocculent Sludge (FS)	FS	Bangkok, Thailand	0.4394	0.003	Anammox (AMX)	AMX	0	Synthetic Wastewater	NA	0.0004725	0.0004725	0.1575	0	0	NA	NA	210	690	100	328.571	105	135	30	38.5714	315	315	0.5873	0.5873	NA	NA	NA	NA	0.2	0.340541	0.2	NA	NA	NA	NA	NA	NA	NA
Panwivia et al., 2014	10.1080/10934529.2014.882674	Lab	Single Stage	Sequencing Batch Biofilm Reactor (SBBR)	SBBR	2.5	Biofilm (BF)	BF	Bangkok, Thailand	0.4394	0.003	Anammox (AMX)	AMX	0	Synthetic Wastewater	NA	0.000309	0.000309	0.103	0	0	NA	NA	103	338.429	NA	NA	103	132.429	NA	NA	206	206	NA	NA	NA	NA	NA	NA	0.014	NA	0.014	NA	NA	NA	NA	NA	NA	NA
Panwivia et al., 2014	10.1080/10934529.2014.882674	Lab	Single Stage	Sequencing Batch Biofilm Reactor (SBBR)	SBBR	2.5	Biofilm (BF)	BF	Bangkok, Thailand	0.4394	0.003	Anammox (AMX)	AMX	0	Synthetic Wastewater	NA	0.0007245	0.0007245	0.2415	0	0	NA	NA	273	897	10	32.8571	210	270	10	12.8571	483	483	0.9586	0.9586	NA	NA	NA	NA	0.022	0.0229503	0.022	NA	NA	NA	NA	NA	NA	NA
Panwivia et al., 2014	10.1080/10934529.2014.882674	Lab	Single Stage	Sequencing Batch Biofilm Reactor (SBBR)	SBBR	2.5	Biofilm (BF)	BF	Bangkok, Thailand	0.4394	0.003	Anammox (AMX)	AMX	0	Synthetic Wastewater	NA	0.0004725	0.0004725	0.1575	0	0	NA	NA	210	690	40	131.429	105	135	3	3.85714	315	315	0.8635	0.8635	NA	NA	NA	NA	0.16	0.185294	0.16	NA	NA	NA	NA	NA	NA	NA
Panwivia et al., 2014	10.1080/10934529.2014.882674	Lab	Single Stage	Sequencing Batch Reactor (SBR)	SBR	2.5	Flocculent Sludge (FS)	FS	Bangkok, Thailand	0.4394	0.003	Anammox (AMX)	AMX	0	Synthetic Wastewater	NA	0.0007245	0.0007245	0.2415	0	0	NA	NA	210	690	NA	NA	273	351	NA	NA	483	483	NA	NA	NA	NA	NA	NA	0.044	NA	0.044	NA	NA	NA	NA	NA	NA	NA
Panwivia et al., 2014	10.1080/10934529.2014.882674	Lab	Single Stage	Sequencing Batch Reactor (SBR)	SBR	2.5	Flocculent Sludge (FS)	FS	Bangkok, Thailand	0.4394	0.003	Anammox (AMX)	AMX	0	Synthetic Wastewater	NA	0.0007245	0.0007245	0.2415	0	0	NA	NA	210	690	NA	NA	273	351	NA	NA	483	483	NA	NA	NA	NA	NA	NA	0.038	NA	0.038	NA	NA	NA	NA	NA	NA	NA
Panwivia et al., 2014	10.1080/10934529.2014.882674	Lab	Single Stage	Sequencing Batch Reactor (SBR)	SBR	2.5	Flocculent Sludge (FS)	FS	Bangkok, Thailand	0.4394	0.003	Anammox (AMX)	AMX	0	Synthetic Wastewater	NA	0.0007245	0.0007245	0.2415	0	0	NA	NA	210	690	NA	NA	273	351	NA	NA	483	483	NA	NA	NA	NA	NA	NA	0.035	NA	0.035	NA	NA	NA	NA	NA	NA	NA
Panwivia et al., 2014	10.1080/10934529.2014.882674	Lab	Single Stage	Sequencing Batch Reactor (SBR)	SBR	2.5	Flocculent Sludge (FS)	FS	Bangkok, Thailand	0.4394	0.003	Anammox (AMX)	AMX	0	Synthetic Wastewater	NA	0.0007245	0.0007245	0.2415	0	0	NA	NA	210	690	NA	NA	273	351	NA	NA	483	483	NA	NA	NA	NA	NA	NA	0.029	NA	0.029	NA	NA	NA	NA	NA	NA	NA
Panwivia et al., 2014	10.1080/10934529.2014.882674	Lab	Single Stage	Sequencing Batch Biofilm Reactor (SBBR)	SBBR	2.5	Biofilm (BF)	BF	Bangkok, Thailand	0.4394	0.003	Anammox (AMX)	AMX	0	Synthetic Wastewater	NA	0.0007245	0.0007245	0.2415	0	0	NA	NA	210	690	10	32.8571	273	351	10	12.8571	483	483	0.9586	0.9586	NA	NA	NA	NA	0.03	0.0312959	0.03	NA	NA	NA	NA	NA	NA	NA
Panwivia et al., 2014	10.1080/10934529.2014.882674	Lab	Single Stage	Sequencing Batch Biofilm Reactor (SBBR)	SBBR	2.5	Biofilm (BF)	BF	Bangkok, Thailand	0.4394	0.003	Anammox (AMX)	AMX	0	Synthetic Wastewater	NA	0.0007245	0.0007245	0.2415	0	0	NA	NA	210	690	10	32.8571	273	351	10	12.8571	483	483	0.9586	0.9586	NA	NA	NA	NA	0.02	0.0208639	0.02	NA	NA	NA	NA	NA	NA	NA
Panwivia et al., 2014	10.1080/10934529.2014.882674	Lab	Single Stage	Sequencing Batch Biofilm Reactor (SBBR)	SBBR	2.5	Biofilm (BF)	BF	Bangkok, Thailand	0.4394	0.003	Anammox (AMX)	AMX	0	Synthetic Wastewater	NA	0.0007245	0.0007245	0.2415	0	0	NA	NA	210	690	10	32.8571	273	351	10	12.8571	483	483	0.9586	0.9586	NA	NA	NA	NA	0.028	0.0292095	0.028	NA	NA	NA	NA	NA	NA	NA
Panwivia et al., 2014	10.1080/10934529.2014.882674	Lab	Single Stage	Sequencing Batch Biofilm Reactor (SBBR)	SBBR	2.5	Biofilm (BF)	BF	Bangkok, Thailand	0.4394	0.003	Anammox (AMX)	AMX	0	Synthetic Wastewater	NA	0.0007245	0.0007245	0.2415	0	0	NA	NA	210	690	10	32.8571	273	351	10	12.8571	483	483	0.9586	0.9586	NA	NA	NA	NA	0.023	0.0239935	0.023	NA	NA	NA	NA	NA	NA	NA
N√†cher bet al., 2010	10.1021/es1013467	Lab	Non-aerated	Membrane Aerated Biofilm Reactor (MABR)	MABR	6	Biofilm (BF)	BF	Lundtofte, Denmark	0.373	0.00241	Anammox (AMX)	AMX	0	Synthetic Wastewater	Non-aerated	0.78 gN/L/d removal	0.00272514	1.13076	0	0	85.4795	378.552	0	0	0	0	750	964.286	146.849	188.806	750	750	0.6898	0.6898	NA	NA	NA	NA	0.001	0.0014497	0.001	NA	NA	NA	NA	NA	NA	NA
N√†cher bet al., 2010	10.1021/es1013467	Lab	Aerated	Membrane Aerated Biofilm Reactor (MABR)	MABR	6	Biofilm (BF)	BF	Lundtofte, Denmark	0.373	0.00241	Partial Nitrification (PN)	PN	3.43	Synthetic Wastewater	Aerated	0.78	0.00272514	1.13076	0	0	85.4795	378.552	0	0	0	0	750	964.286	146.849	188.806	750	750	0.6898	0.6898	NA	NA	NA	NA	0.015	0.0217454	0.015	NA	NA	NA	NA	NA	NA	NA
Peng et al., 2020	10.1021/acs.est.9b06404	Lab	Single Stage	Sequencing Batch Biofilm Reactor (SBBR)	SBBR	2.5	Biofilm + Flocculent Sludge (BF+FS)	BF	Ant- werpen, Belgium	0.15	0.0045	Partial Nitrification / Anammox (PNA)	PNA	2.2	Synthetic Wastewater	NA	200mgN/L/d	0.0009	0.2	0	0	27.8226	123.214	0	0	1.78144	5.85331	50	64.2857	0.201613	0.259217	50	50	0.3402	0.3402	NA	NA	NA	NA	1.81481	5.33379	1.81481	NA	NA	NA	NA	NA	NA	NA
Peng et al., 2020	10.1021/acs.est.9b06404	Lab	Single Stage	Sequencing Batch Biofilm Reactor (SBBR)	SBBR	2.5	Biofilm + Flocculent Sludge (BF+FS)	BF	Ant- werpen, Belgium	0.15	0.0045	Partial Nitrification / Anammox (PNA)	PNA	2.2	Synthetic Wastewater	NA	200	0.0009	0.2	0	0	26.2097	116.071	0	0	1.85174	6.0843	50	64.2857	0.201613	0.259217	50	50	0.4315	0.4315	NA	NA	NA	NA	1.96296	4.54879	1.96296	NA	NA	NA	NA	NA	NA	NA
Peng et al., 2020	10.1021/acs.est.9b06404	Lab	Single Stage	Sequencing Batch Biofilm Reactor (SBBR)	SBBR	2.5	Biofilm + Flocculent Sludge (BF+FS)	BF	Ant- werpen, Belgium	0.15	0.0045	Partial Nitrification / Anammox (PNA)	PNA	2.2	Synthetic Wastewater	NA	200	0.0009	0.2	0	0	26.8145	118.75	0	0	3.0054	9.87489	50	64.2857	0.604839	0.77765	50	50	0.4481	0.4481	NA	NA	NA	NA	3.31481	7.39695	3.31481	NA	NA	NA	NA	NA	NA	NA
Peng et al., 2020	10.1021/acs.est.9b06404	Lab	Single Stage	Sequencing Batch Biofilm Reactor (SBBR)	SBBR	2.5	Biofilm + Flocculent Sludge (BF+FS)	BF	Ant- werpen, Belgium	0.15	0.0045	Partial Nitrification / Anammox (PNA)	PNA	2.2	Synthetic Wastewater	NA	200	0.0009	0.2	0	0	5.48656	24.2976	0	0	0.909513	2.9884	50	64.2857	8.53503	10.9736	50	50	0.7094	0.7094	NA	NA	NA	NA	1.50943	2.12776	1.50943	NA	NA	NA	NA	NA	NA	NA
Peng et al., 2020	10.1021/acs.est.9b06404	Lab	Single Stage	Sequencing Batch Biofilm Reactor (SBBR)	SBBR	2.5	Biofilm + Flocculent Sludge (BF+FS)	BF	Ant- werpen, Belgium	0.15	0.0045	Partial Nitrification / Anammox (PNA)	PNA	2.2	Synthetic Wastewater	NA	200	0.0009	0.2	0	0	7.92683	35.1045	0	0	1.72622	5.67186	50	64.2857	7.31645	9.40687	50	50	0.6923	0.6923	NA	NA	NA	NA	1.77358	2.56184	1.77358	NA	NA	NA	NA	NA	NA	NA
Peng et al., 2020	10.1021/acs.est.9b06404	Lab	Single Stage	Sequencing Batch Biofilm Reactor (SBBR)	SBBR	2.5	Biofilm + Flocculent Sludge (BF+FS)	BF	Ant- werpen, Belgium	0.15	0.0045	Partial Nitrification / Anammox (PNA)	PNA	2.2	Synthetic Wastewater	NA	200	0.0009	0.2	0	0	2.84118	12.5824	0	0	2.56148	8.41631	50	64.2857	11.3778	14.6286	50	50	0.6197	0.6197	NA	NA	NA	NA	2.86792	4.62824	2.86792	NA	NA	NA	NA	NA	NA	NA
Peng et al., 2020	10.1021/acs.est.9b06404	Lab	Single Stage	Sequencing Batch Biofilm Reactor (SBBR)	SBBR	2.5	Biofilm + Flocculent Sludge (BF+FS)	BF	Ant- werpen, Belgium	0.15	0.0045	Partial Nitrification / Anammox (PNA)	PNA	2.2	Synthetic Wastewater	NA	200	0.0009	0.2	0	0	2.6373	11.6795	0	0	3.50812	11.5267	50	64.2857	11.3768	14.6274	50	50	0.6667	0.6667	NA	NA	NA	NA	3.26415	4.89623	3.26415	NA	NA	NA	NA	NA	NA	NA
Peng et al., 2020	10.1021/acs.est.9b06404	Lab	Single Stage	Sequencing Batch Biofilm Reactor (SBBR)	SBBR	2.5	Biofilm + Flocculent Sludge (BF+FS)	BF	Ant- werpen, Belgium	0.15	0.0045	Partial Nitrification / Anammox (PNA)	PNA	2.2	Synthetic Wastewater	NA	200	0.0009	0.2	0	0	5.07509	22.4754	0	0	3.65661	12.0146	50	64.2857	9.95313	12.7969	50	50	0.641	0.641	NA	NA	NA	NA	3.54717	5.53358	3.54717	NA	NA	NA	NA	NA	NA	NA
Podder et al., 2020	10.1016/j.biortech.2020.123578	Lab	Single Stage	Sequencing Batch Biofilm Reactor (SBBR)	SBBR	2.5	Biofilm (BF)	BF	Utah, US	0.705295	0.002	Partial Nitrification / Anammox (PNA)	PNA	2.2	Synthetic Wastewater	Intermittant Aeration	8.9e-05	8.9e-05	0.0445055	3.663	16.2219	0.18315	0.811094	0	0	4.57875	15.0445	85.348	109.733	2.5641	3.2967	89.011	89.011	0.9177	0.9177	NA	NA	NA	NA	0.31	0.337803	0.31	NA	NA	NA	NA	NA	NA	457.949
Podder et al., 2020	10.1016/j.biortech.2020.123578	Lab	Single Stage	Sequencing Batch Biofilm Reactor (SBBR)	SBBR	2.5	Biofilm (BF)	BF	Utah, US	0.705295	0.002	Partial Nitrification / Anammox (PNA)	PNA	2.2	Synthetic Wastewater	Intermittant Aeration	8.9e-05	8.9e-05	0.0445055	3.663	16.2219	0.18315	0.811094	0	0	4.57875	15.0445	85.348	109.733	2.5641	3.2967	89.011	89.011	0.9177	0.9177	NA	NA	NA	NA	0.6	0.653812	0.6	NA	NA	NA	NA	NA	NA	457.949
Podder et al., 2020	10.1016/j.biortech.2020.123578	Lab	Single Stage	Sequencing Batch Biofilm Reactor (SBBR)	SBBR	2.5	Biofilm (BF)	BF	Utah, US	0.705295	0.002	Partial Nitrification / Anammox (PNA)	PNA	2.2	Synthetic Wastewater	Intermittant Aeration	8.9e-05	8.9e-05	0.0445055	3.663	16.2219	0.18315	0.811094	0	0	4.57875	15.0445	85.348	109.733	2.5641	3.2967	89.011	89.011	0.9177	0.9177	NA	NA	NA	NA	0.25	0.272422	0.25	NA	NA	NA	NA	NA	NA	457.949
Qiu et al., 2021	10.1016/j.jclepro.2021.126104	Lab	Single Stage	Sequencing Batch Reactor (SBR)	SBR	2.5	Flocculent Sludge (FS)	FS	Galway, Ireland	0.255	0.008	Partial Nitrification / Anammox (PNA)	PNA	2.2	Synthetic Wastewater	Intermittant Aeration	0.000827586	0.000827586	0.103448	NA	NA	NA	NA	NA	NA	NA	NA	300	385.714	NA	NA	300	300	0.75	0.75	NA	NA	NA	NA	0.57	0.76	0.57	NA	NA	NA	NA	NA	NA	100
Qiu et al., 2021	10.1016/j.jclepro.2021.126104	Lab	Single Stage	Sequencing Batch Reactor (SBR)	SBR	2.5	Flocculent Sludge (FS)	FS	Galway, Ireland	0.255	0.008	Partial Nitrification / Anammox (PNA)	PNA	2.2	Synthetic Wastewater	Intermittant Aeration	0.000827586	0.000827586	0.103448	NA	NA	NA	NA	NA	NA	NA	NA	300	385.714	NA	NA	300	300	0.75	0.75	NA	NA	NA	NA	0.39	0.52	0.39	NA	NA	NA	NA	NA	NA	0
Ramos et al., 2015	10.1016/j.procbio.2015.12.020	Lab	Single Stage	Expanded Granular Sludge Bed (EGSB)	EGSB	NA	Granular Sludge (GS)	GS	Barcelona, Spain	0.256	0.0026	Partial Nitrification (PN)	PN	3.43	Synthetic Wastewater	Aromatic compounds and salt	1.1 gN/L/d	0.00286	1.1	NA	NA	NA	NA	NA	NA	499	1639.57	1000	1285.71	419	538.714	1000	1000	0.581	0.581	NA	NA	NA	NA	6.50176	11.1906	6.50176	NA	NA	NA	NA	NA	NA	0.7 gCOD/L/d
Ramos et al., 2015	10.1016/j.procbio.2015.12.020	Lab	Single Stage	Expanded Granular Sludge Bed (EGSB)	EGSB	NA	Granular Sludge (GS)	GS	Barcelona, Spain	0.256	0.0026	Partial Nitrification (PN)	PN	3.43	Synthetic Wastewater	Aromatic compounds and salt	1.1	0.00286	1.1	NA	NA	NA	NA	NA	NA	499	1639.57	1000	1285.71	419	538.714	1000	1000	0.581	0.581	NA	NA	NA	NA	2.39395	4.1204	2.39395	NA	NA	NA	NA	NA	NA	0.7
Ramos et al., 2015	10.1016/j.procbio.2015.12.020	Lab	Single Stage	Expanded Granular Sludge Bed (EGSB)	EGSB	NA	Granular Sludge (GS)	GS	Barcelona, Spain	0.256	0.0026	Partial Nitrification (PN)	PN	3.43	Synthetic Wastewater	Aromatic compounds and salt	1.1	0.00286	1.1	NA	NA	NA	NA	NA	NA	499	1639.57	1000	1285.71	419	538.714	1000	1000	0.581	0.581	NA	NA	NA	NA	2.58438	4.44816	2.58438	NA	NA	NA	NA	NA	NA	0.7
Ramos et al., 2015	10.1016/j.procbio.2015.12.020	Lab	Single Stage	Expanded Granular Sludge Bed (EGSB)	EGSB	NA	Granular Sludge (GS)	GS	Barcelona, Spain	0.256	0.0026	Partial Nitrification (PN)	PN	3.43	Synthetic Wastewater	Aromatic compounds and salt	1.1	0.00286	1.1	NA	NA	NA	NA	NA	NA	499	1639.57	1000	1285.71	419	538.714	1000	1000	0.581	0.581	NA	NA	NA	NA	1.84987	3.18395	1.84987	NA	NA	NA	NA	NA	NA	0.7
Schoepp et al., 2018	10.2166/wst.2018.500	Pilot	Single Stage	Sequencing Batch Reactor (SBR)	SBR	2.5	Flocculent Sludge (FS)	FS	Vienna, Austria	0.059	0.375	Partial Nitrification / Anammox (PNA)	PNA	2.2	Reject Water	NA	0.51 kgN/m3/d	0.19125	0.51	3.2	14.1714	246	1089.43	3.1	10.1857	3	9.85714	1241	1595.57	56	72	1247.3	1247.3	0.76	0.76	NA	NA	NA	NA	4.3	6.8	4.3	NA	NA	NA	NA	NA	NA	NA
Schoepp et al., 2018	10.2166/wst.2018.500	Pilot	Two Stage	Sequencing Batch Reactor (SBR)	SBR	2.5	Flocculent Sludge (FS)	FS	Vienna, Austria	0.059	0.375	Partial Nitrification / Anammox (PNA)	PNA	2.2	Reject Water	NA	0.52	0.195	0.52	3.2	14.1714	286	1266.57	3.1	10.1857	1.6	5.25714	1241	1595.57	51	65.5714	1247.3	1247.3	0.71	0.71	NA	NA	NA	NA	3.7	5.2	3.7	NA	NA	NA	NA	NA	NA	NA
Schoepp et al., 2018	10.2166/wst.2018.500	Pilot	Two Stage	Completely Stirred Tank Reactor (CSTR)	CSTR	2.5	Flocculent Sludge (FS)	FS	Vienna, Austria	0.059	0.375	Partial Nitrification / Anammox (PNA)	PNA	2.2	Reject Water	NA	0.57	0.21375	0.57	3.2	14.1714	315	1395	3.1	10.1857	4.3	14.1286	1241	1595.57	84	108	1247.3	1247.3	0.69	0.69	NA	NA	NA	NA	1.8	2.8	1.8	NA	NA	NA	NA	NA	NA	NA
Suenaga et al., 2021	10.1021/acs.est.1c00674	Lab	Single Stage	Upflow Fixed-bed Anammox Reactor (UFAR)	UFAR	NA	Biofilm (BF)	BF	Tokyo, Japan	0.435	0.005	Anammox (AMX)	AMX	0	Synthetic Wastewater	NA	3.35 gN/d	0.0035	0.7	0	0	NA	NA	200	657.143	NA	NA	200	257.143	NA	NA	400	400	0.713	0.713	NA	NA	NA	NA	0.284	0.398317	0.284	NA	NA	NA	NA	NA	NA	NA
Wan et al., 2021	10.1016/j.scitotenv.2021.149092	Lab	Single Stage	Bubble Column Reactor (BCR)	BCR	2.5	Granular Sludge (GS)	GS	Tilburg, The Netherlands	0.256	0.0065	Partial Nitrification / Anammox (PNA)	PNA	2.2	Synthetic Wastewater	NA	0.00352258	0.00352258	0.541935	0	0	116.129	514.286	0	0	0	0	541.935	696.774	32.2581	41.4747	541.935	541.935	0.7262	0.7262	NA	NA	NA	NA	0.13112583 gN/d	5.12598	3.72244	NA	NA	NA	NA	NA	NA	400
Wan et al., 2021	10.1016/j.scitotenv.2021.149092	Lab	Single Stage	Bubble Column Reactor (BCR)	BCR	2.5	Granular Sludge (GS)	GS	Tilburg, The Netherlands	0.256	0.0065	Partial Nitrification / Anammox (PNA)	PNA	2.2	Synthetic Wastewater	NA	0.0052	0.0052	0.8	0	0	109.677	485.714	0	0	32.2581	105.991	800	1028.57	32.2581	41.4747	800	800	0.7823	0.7823	NA	NA	NA	NA	0.270199	6.64247	5.19613	NA	NA	NA	NA	NA	NA	748.387
Wan et al., 2021	10.1016/j.scitotenv.2021.149092	Lab	Single Stage	Bubble Column Reactor (BCR)	BCR	2.5	Granular Sludge (GS)	GS	Tilburg, The Netherlands	0.256	0.0065	Partial Nitrification / Anammox (PNA)	PNA	2.2	Synthetic Wastewater	NA	0.0052	0.0052	0.8	0	0	64.5161	285.714	0	0	83.871	275.576	800	1028.57	141.935	182.488	800	800	0.6371	0.6371	NA	NA	NA	NA	0.194702	5.87708	3.74427	NA	NA	NA	NA	NA	NA	683.871
Wan et al., 2021	10.1016/j.scitotenv.2021.149092	Lab	Single Stage	Bubble Column Reactor (BCR)	BCR	2.5	Granular Sludge (GS)	GS	Tilburg, The Netherlands	0.256	0.0065	Partial Nitrification / Anammox (PNA)	PNA	2.2	Synthetic Wastewater	NA	0.00582903	0.00582903	0.896774	0	0	25.8065	114.286	0	0	19.3548	63.5945	896.774	1153	180.645	232.258	896.774	896.774	0.7482	0.7482	NA	NA	NA	NA	0.115232	2.64215	1.97686	NA	NA	NA	NA	NA	NA	800
Wan et al., 2021	10.1016/j.scitotenv.2021.149092	Lab	Single Stage	Bubble Column Reactor (BCR)	BCR	2.5	Granular Sludge (GS)	GS	Tilburg, The Netherlands	0.256	0.0065	Partial Nitrification / Anammox (PNA)	PNA	2.2	Synthetic Wastewater	NA	0.00515806	0.00515806	0.793548	0	0	58.0645	257.143	0	0	6.45161	21.1982	793.548	1020.28	77.4194	99.5392	793.548	793.548	0.8211	0.8211	NA	NA	NA	NA	0.15894	3.75259	3.0814	NA	NA	NA	NA	NA	NA	0
Wan et al., 2021	10.1016/j.scitotenv.2021.149092	Lab	Single Stage	Bubble Column Reactor (BCR)	BCR	2.5	Granular Sludge (GS)	GS	Tilburg, The Netherlands	0.256	0.0065	Partial Nitrification / Anammox (PNA)	PNA	2.2	Synthetic Wastewater	NA	0.00515806	0.00515806	0.793548	0	0	70.9677	314.286	0	0	6.45161	21.1982	793.548	1020.28	154.839	199.078	793.548	793.548	0.7073	0.7073	NA	NA	NA	NA	0.0596027	1.63367	1.15552	NA	NA	NA	NA	NA	NA	6.45161
Wan et al., 2021	10.1016/j.scitotenv.2021.149092	Lab	Single Stage	Bubble Column Reactor (BCR)	BCR	2.5	Granular Sludge (GS)	GS	Tilburg, The Netherlands	0.256	0.0065	Partial Nitrification / Anammox (PNA)	PNA	2.2	Synthetic Wastewater	NA	0.0052	0.0052	0.8	0	0	83.871	371.429	0	0	19.3548	63.5945	800	1028.57	64.5161	82.9493	800	800	0.7903	0.7903	NA	NA	NA	NA	0.0993378	2.41717	1.91034	NA	NA	NA	NA	NA	NA	0
Wan et al., 2021	10.1016/j.scitotenv.2021.149092	Lab	Single Stage	Bubble Column Reactor (BCR)	BCR	2.5	Granular Sludge (GS)	GS	Tilburg, The Netherlands	0.256	0.0065	Partial Nitrification / Anammox (PNA)	PNA	2.2	Synthetic Wastewater	NA	0.0052	0.0052	0.8	0	0	6.45161	28.5714	0	0	6.45161	21.1982	800	1028.57	225.806	290.323	800	800	0.7016	0.7016	NA	NA	NA	NA	0.0198676	0.544557	0.382068	NA	NA	NA	NA	NA	NA	754.839
Wang et al., 2021b	10.1016/j.biortech.2021.125762	Lab	Single Stage	Sequencing Batch Reactor (SBR)	SBR	2.5	Granular Sludge (GS)	GS	Beijing, China	0.5688	0.0024	Partial Nitrification / Anammox (PNA)	PNA	2.2	Reject Water	NA	0.75	0.0018	0.75	20.4054	90.3668	74.4595	329.749	1.82432	5.99421	0.135135	0.444015	234.932	302.056	8.58108	11.0328	515.625	515.625	0.81	0.81	NA	NA	NA	NA	1.15	1.15	0.9315	NA	NA	NA	NA	NA	NA	543.042
Wang et al., 2021b	10.1016/j.biortech.2021.125762	Lab	Single Stage	Sequencing Batch Reactor (SBR)	SBR	2.5	Granular Sludge (GS)	GS	Beijing, China	0.5688	0.0024	Partial Nitrification / Anammox (PNA)	PNA	2.2	Synthetic Wastewater	NA	1.1	0.00264	1.1	41.3907	183.302	68.7086	304.281	2.48344	8.15989	0	0	245.033	315.043	19.8675	25.544	554.583	554.583	0.87	0.87	NA	NA	NA	NA	0.95	0.95	0.8265	NA	NA	NA	NA	NA	NA	454.369
Wang et al., 2019b	10.1016/j.jes.2019.03.016	Lab	Single Stage	Upflow Anaerobic Sludge Blanket (UASB)	UASB	NA	Granular Sludge (GS)	GS	Beijing, China	0.5688	0.006	Anammox (AMX)	AMX	0	Synthetic Wastewater	NA	2.3	0.0138	2.3	0	0	5.34591	23.6748	59.1195	194.25	0	0	37.7358	48.5175	3.14465	4.04313	96.8553	96.8553	0.9123	0.9123	NA	0.0100538	NA	NA	0.157266	0.172377	0.157266	NA	NA	NA	0.000150713	NA	NA	NA
Wang et al., 2016b	10.1016/j.procbio.2016.02.001	Lab	Single Stage	Membrane Bioreactor (MBR)	MBR	4.26	Flocculent Sludge (FS)	FS	Dalian, China	0.5876	0.0045	Simultaneous partial Nitrification, ANAMMOX and Denitrification (SNAD)	SNAD	2.2	Synthetic Wastewater	Intermittent Areation	0.00194149	0.00194149	0.431443	0	0	9.27835	41.0898	0	0	5.15464	16.9367	287.629	369.809	6.70103	8.61561	287.629	287.629	0.9542	0.9542	NA	NA	NA	NA	2	2.19217	2	NA	NA	NA	NA	NA	NA	151.546
Weissenbacher et al., 2010	10.2175/106143009X447867	Full	Single Stage	Sequencing Batch Reactor (SBR)	SBR	2.5	Granular Sludge + Flocculent Sludge (GS+FS)	GS	Innsbruck, Austria	0.153	500	Partial Nitrification / Anammox (PNA)	PNA	2.2	Reject Water	Intermittent Areation	230.567	230.567	0.461133	0	0	54.4	240.914	0	0	0.16587	0.545	1800	1800	11.7767	15.1415	1521.74	1521.74	0.891	0.891	NA	NA	NA	NA	1.3	1.3	1.1583	NA	NA	NA	NA	NA	NA	NA
Yan et al., 2019	10.1016/j.chemosphere.2019.04.148	Lab	Single Stage	Sequencing Batch Biofilm Reactor (SBBR)	SBBR	2.5	Biofilm (BF)	BF	Chongqing, China	0.4743	0.03	Partial Nitrification / Anammox (PNA)	PNA	2.2	Synthetic Wastewater	NA	0.0054	0.0054	0.18	12.1951	54.007	12.1951	54.007	1.26829	4.16725	0.634146	2.08362	360	462.857	0	0	360	360	0.81	0.81	0.81607419 mgN/gBiomass/h	0.01689516 mgN/gBiomass/h	NA	NA	2.08333	2.08333	1.6875	NA	NA	NA	NA	NA	NA	0
Yan et al., 2019	10.1016/j.chemosphere.2019.04.148	Lab	Single Stage	Sequencing Batch Biofilm Reactor (SBBR)	SBBR	2.5	Biofilm (BF)	BF	Chongqing, China	0.4743	0.03	Partial Nitrification / Anammox (PNA)	PNA	2.2	Synthetic Wastewater	NA	0.0054	0.0054	0.18	36.5854	162.021	2.43902	10.8014	2.53659	8.33449	0.926829	3.0453	360	462.857	0	0	360	360	0.82	0.82	0.831376	0.0153226	NA	NA	1.84304	1.84304	1.51129	NA	NA	NA	NA	NA	NA	240
Yan et al., 2019	10.1016/j.chemosphere.2019.04.148	Lab	Single Stage	Sequencing Batch Biofilm Reactor (SBBR)	SBBR	2.5	Biofilm (BF)	BF	Chongqing, China	0.4743	0.03	Partial Nitrification / Anammox (PNA)	PNA	2.2	Synthetic Wastewater	NA	0.0054	0.0054	0.18	7.31707	32.4042	4.87805	21.6028	0.878049	2.88502	0.536585	1.76307	360	462.857	0	0	360	360	0.84	0.84	0.856878	0.0141129	NA	NA	1.64701	1.64701	1.38349	NA	NA	NA	NA	NA	NA	360
Yu et al., 2025	10.1016/j.biortech.2024.132022	Lab	Single Stage	Upflow Fixed-bed Anammox Reactor (UFAR)	UFAR	NA	Biofilm (BF)	BF	Xiangtan, China	0.49	0.0002	Anammox (AMX)	AMX	0	Synthetic Wastewater	NA	1.2	0.00024	1.2	0	0	7.33333	32.4762	50	164.286	23.2877	76.5166	50	64.2857	38.6667	49.7143	100	100	0.3793	0.3793	NA	NA	NA	NA	NA	0.89	0.28	NA	NA	NA	NA	NA	NA	NA
Yu et al., 2025	10.1016/j.biortech.2024.132022	Lab	Single Stage	Upflow Fixed-bed Anammox Reactor (UFAR)	UFAR	NA	Biofilm (BF)	BF	Xiangtan, China	0.49	0.0002	Anammox (AMX)	AMX	0	Synthetic Wastewater	NA	1.2	0.00024	1.2	0	0	14	62	50	164.286	8.21918	27.0059	50	64.2857	16	20.5714	100	100	0.8399	0.8399	NA	NA	NA	NA	NA	0.21	0.15	NA	NA	NA	NA	NA	NA	NA
Yu et al., 2025	10.1016/j.biortech.2024.132022	Lab	Single Stage	Upflow Fixed-bed Anammox Reactor (UFAR)	UFAR	NA	Biofilm (BF)	BF	Xiangtan, China	0.49	0.0002	Anammox (AMX)	AMX	0	Synthetic Wastewater	NA	1.2	0.00024	1.2	0	0	8.66667	38.381	50	164.286	0.684932	2.25049	50	64.2857	8.66667	11.1429	100	100	0.867	0.867	NA	NA	NA	NA	NA	0.04	0.03	NA	NA	NA	NA	NA	NA	NA
Yu et al., 2025	10.1016/j.biortech.2024.132022	Lab	Single Stage	Upflow Fixed-bed Anammox Reactor (UFAR)	UFAR	NA	Biofilm (BF)	BF	Xiangtan, China	0.49	0.0002	Anammox (AMX)	AMX	0	Synthetic Wastewater	NA	1.2	0.00024	1.2	0	0	5.33333	23.619	50	164.286	45.2055	148.532	50	64.2857	44	56.5714	100	100	0.0493	0.0493	NA	NA	NA	NA	NA	1.36	0.26	NA	NA	NA	NA	NA	NA	NA
Yu et al., 2025	10.1016/j.biortech.2024.132022	Lab	Single Stage	Upflow Fixed-bed Anammox Reactor (UFAR)	UFAR	NA	Biofilm (BF)	BF	Xiangtan, China	0.49	0.0002	Anammox (AMX)	AMX	0	Synthetic Wastewater	NA	1.2	0.00024	1.2	0	0	2	8.85714	50	164.286	47.9452	157.534	50	64.2857	44	56.5714	100	100	0.0222	0.0222	NA	NA	NA	NA	NA	3.82	0.16	NA	NA	NA	NA	NA	NA	NA
Zhang et al., 2018	10.1016/j.biortech.2017.11.027	Lab	Single Stage	Expanded Granular Sludge Bed (EGSB)	EGSB	NA	Granular Sludge (GS)	GS	Guilin, China	0.5154	0.008	Anammox (AMX)	AMX	0	Synthetic Wastewater	20 mg/L IC	1 kgN/m3/d	0.008	1	0	0	NA	NA	120	394.286	NA	NA	100	128.571	NA	NA	220	220	0.756	0.756	NA	NA	NA	NA	NA	0.20044	0.151541	NA	NA	NA	NA	NA	NA	NA
Zhang et al., 2018	10.1016/j.biortech.2017.11.027	Lab	Single Stage	Expanded Granular Sludge Bed (EGSB)	EGSB	NA	Granular Sludge (GS)	GS	Guilin, China	0.5154	0.008	Anammox (AMX)	AMX	0	Synthetic Wastewater	55 mg/L IC	2 kgN/m3/d	0.008	1	0	0	NA	NA	120	394.286	NA	NA	100	128.571	NA	NA	220	220	0.8022	0.8022	NA	NA	NA	NA	NA	0.400879	0.321584	NA	NA	NA	NA	NA	NA	NA
Zhang et al., 2018	10.1016/j.biortech.2017.11.027	Lab	Single Stage	Expanded Granular Sludge Bed (EGSB)	EGSB	NA	Granular Sludge (GS)	GS	Guilin, China	0.5154	0.008	Anammox (AMX)	AMX	0	Synthetic Wastewater	130 mg/L IC	3 kgN/m3/d	0.008	1	0	0	NA	NA	120	394.286	NA	NA	100	128.571	NA	NA	220	220	0.8857	0.8857	NA	NA	NA	NA	NA	0.598681	0.530261	NA	NA	NA	NA	NA	NA	NA
Zhang et al., 2018	10.1016/j.biortech.2017.11.027	Lab	Single Stage	Expanded Granular Sludge Bed (EGSB)	EGSB	NA	Granular Sludge (GS)	GS	Guilin, China	0.5154	0.008	Anammox (AMX)	AMX	0	Synthetic Wastewater	180 mg/L IC	4 kgN/m3/d	0.008	1	0	0	NA	NA	120	394.286	NA	NA	100	128.571	NA	NA	220	220	0.8857	0.8857	NA	NA	NA	NA	NA	0.949451	0.840942	NA	NA	NA	NA	NA	NA	NA
Zhang et al., 2024b	10.1016/j.watres.2024.121491	Lab	Three Stage	Continuous-Flow Biofilm Reactor (CFBR)	AOBR	2.5	Biofilm (BF)	BF	Guangzhou, China	0.4403	0.006	Partial Denitrification / Anammox (PdNA)	PdNA	2.96	Synthetic Wastewater	NA	0.00454909	0.00454909	0.758182	0.909091	4.02597	NA	NA	NA	NA	1.3	4.27143	62.2727	80.0649	9.31818	11.9805	63.1818	63.1818	0.32	0.32	NA	NA	NA	NA	NA	0.021875	0.007	NA	NA	NA	NA	NA	NA	NA
Zhang et al., 2024b	10.1016/j.watres.2024.121491	Lab	Three Stage	Continuous-Flow Biofilm Reactor (CFBR)	AOBR	2.5	Biofilm (BF)	BF	Guangzhou, China	0.4403	0.0045	Partial Nitrification / Anammox (PNA)	PNA	2.2	Synthetic Wastewater	Intermittent Areation	0.00150545	0.00150545	0.334545	5	22.1429	NA	NA	NA	NA	0.58	1.90571	15.9091	20.4545	7.72727	9.93506	20.9091	20.9091	0.272	0.272	NA	NA	NA	NA	NA	0.363971	0.099	NA	NA	NA	NA	NA	NA	NA
Zhang et al., 2024b	10.1016/j.watres.2024.121491	Lab	Three Stage	Continuous-Flow Biofilm Reactor (CFBR)	AOBR	2.5	Biofilm (BF)	BF	Guangzhou, China	0.4403	0.003	Partial Denitrification / Anammox (PdNA)	PdNA	2.96	Synthetic Wastewater	NA	0.00117818	0.00117818	0.392727	7.04545	31.2013	NA	NA	NA	NA	0.12	0.394286	9.31818	11.9805	2.5	3.21429	16.3636	16.3636	0.194	0.194	NA	NA	NA	NA	NA	0.0103093	0.002	NA	NA	NA	NA	NA	NA	NA
Zhang et al., 2024b	10.1016/j.watres.2024.121491	Lab	Three Stage	Continuous-Flow Biofilm Reactor (CFBR)	AOBR	2.5	Biofilm (BF)	BF	Guangzhou, China	0.4403	0.0045	Partial Nitrification / Anammox (PNA)	PNA	2.2	Synthetic Wastewater	Intermittent Areation	0.000981818	0.000981818	0.218182	5.90909	26.1688	NA	NA	NA	NA	0.38	1.24857	7.72727	9.93506	1.59091	2.04545	13.6364	13.6364	0.17	0.17	NA	NA	NA	NA	NA	0.511765	0.087	NA	NA	NA	NA	NA	NA	NA
Zhang et al., 2024b	10.1016/j.watres.2024.121491	Lab	Three Stage	Continuous-Flow Biofilm Reactor (CFBR)	AOBR	2.5	Biofilm (BF)	BF	Guangzhou, China	0.4403	0.003	Partial Denitrification / Anammox (PdNA)	PdNA	2.96	Synthetic Wastewater	NA	0.000850909	0.000850909	0.283636	9.31818	41.2662	NA	NA	NA	NA	0.13	0.427143	2.5	3.21429	0.454545	0.584416	11.8182	11.8182	0.045	0.045	NA	NA	NA	NA	NA	0.0888889	0.004	NA	NA	NA	NA	NA	NA	NA
Zhu et al., 2023	10.1016/j.biortech.2023.129607	Lab	Single Stage	Rotating Biological Contactor (RBC)	RBC	2.1	Biofilm (BF)	BF	Antwerpen, Belgium	0.15	0.051	Partial Nitrification / Anammox (PNA)	PNA	2.2	Synthetic Wastewater	NA	105.2 mgN/L/d	0.0053652	0.1052	9.23077	40.8791	13.9847	61.9324	2.93077	9.62967	0.916031	3.00981	47.5676	61.1583	12.9	16.5857	59.7291	59.7291	0.5588	0.5588	NA	NA	NA	NA	1.58687	1.58687	0.88678	NA	NA	NA	NA	NA	NA	NA
Zhu et al., 2023	10.1016/j.biortech.2023.129607	Lab	Single Stage	Rotating Biological Contactor (RBC)	RBC	2.1	Biofilm (BF)	BF	Antwerpen, Belgium	0.15	0.051	Partial Nitrification / Anammox (PNA)	PNA	2.2	Synthetic Wastewater	NA	105.2	0.0053652	0.1052	9.23077	40.8791	13.9847	61.9324	2.93077	9.62967	0.916031	3.00981	47.5676	61.1583	12.9	16.5857	59.7291	59.7291	0.5588	0.5588	NA	NA	NA	NA	1.85907	1.85907	1.03889	NA	NA	NA	NA	NA	NA	NA
Zhu et al., 2023	10.1016/j.biortech.2023.129607	Lab	Single Stage	Rotating Biological Contactor (RBC)	RBC	2.1	Biofilm (BF)	BF	Antwerpen, Belgium	0.15	0.051	Partial Nitrification / Anammox (PNA)	PNA	2.2	Synthetic Wastewater	NA	105.2	0.0053652	0.1052	9.23077	40.8791	13.9847	61.9324	2.93077	9.62967	0.916031	3.00981	47.5676	61.1583	12.9	16.5857	59.7291	59.7291	0.5588	0.5588	NA	NA	NA	NA	2.08494	2.08494	1.16511	NA	NA	NA	NA	NA	NA	NA
Zhu et al., 2023	10.1016/j.biortech.2023.129607	Lab	Single Stage	Rotating Biological Contactor (RBC)	RBC	2.1	Biofilm (BF)	BF	Antwerpen, Belgium	0.15	0.051	Partial Nitrification / Anammox (PNA)	PNA	2.2	Synthetic Wastewater	NA	105.2	0.0053652	0.1052	9.23077	40.8791	13.9847	61.9324	2.93077	9.62967	0.916031	3.00981	47.5676	61.1583	12.9	16.5857	59.7291	59.7291	0.5588	0.5588	NA	NA	NA	NA	2.39768	2.39768	1.33988	NA	NA	NA	NA	NA	NA	NA
Zhu et al., 2023	10.1016/j.biortech.2023.129607	Lab	Single Stage	Rotating Biological Contactor (RBC)	RBC	2.1	Biofilm (BF)	BF	Antwerpen, Belgium	0.15	0.051	Partial Nitrification / Anammox (PNA)	PNA	2.2	Synthetic Wastewater	NA	105.2	0.0053652	0.1052	9.23077	40.8791	13.9847	61.9324	2.93077	9.62967	0.916031	3.00981	47.5676	61.1583	12.9	16.5857	59.7291	59.7291	0.5588	0.5588	NA	NA	NA	NA	2.46718	2.46718	1.37872	NA	NA	NA	NA	NA	NA	NA
[truncated: 47 more columns]
